# Supplementary material for: Kelp carbon sink potential decreases with warming due to accelerating decomposition
Source: PLoS Biol. 2022 Aug 4;20(8):e3001702. doi: 10.1371/journal.pbio.3001702 (PMC9352061; doi:10.1371/journal.pbio.3001702)
Supplement: S1 Data — File containing sheets for Data A, Data B, Data C, Data D, Data E, Data F, and metadata. (XLSX) [file pbio.3001702.s011.xlsx]

## Sheet: Data A
Date	Temperature	Light	Region	Site	SiteName	retrieval	day of year
2018-05-31 23:00:00	6.877	0	Gulf of Alaska	1	Herring	1	151.958
2018-06-01	6.877	0	Gulf of Alaska	1	Herring	1	152
2018-06-01 01:00:00	6.775	0	Gulf of Alaska	1	Herring	1	152.042
2018-06-01 02:00:00	6.775	0	Gulf of Alaska	1	Herring	1	152.083
2018-06-01 03:00:00	6.775	0	Gulf of Alaska	1	Herring	1	152.125
2018-06-01 04:00:00	6.877	0	Gulf of Alaska	1	Herring	1	152.167
2018-06-01 05:00:00	6.471	0	Gulf of Alaska	1	Herring	1	152.208
2018-06-01 06:00:00	6.37	0	Gulf of Alaska	1	Herring	1	152.25
2018-06-01 07:00:00	6.471	0	Gulf of Alaska	1	Herring	1	152.292
2018-06-01 08:00:00	6.573	1	Gulf of Alaska	1	Herring	1	152.333
2018-06-01 09:00:00	6.978	5	Gulf of Alaska	1	Herring	1	152.375
2018-06-01 10:00:00	7.179	7	Gulf of Alaska	1	Herring	1	152.417
2018-06-01 11:00:00	7.28	10	Gulf of Alaska	1	Herring	1	152.458
2018-06-01 12:00:00	7.28	4	Gulf of Alaska	1	Herring	1	152.5
2018-06-01 13:00:00	7.079	4	Gulf of Alaska	1	Herring	1	152.542
2018-06-01 14:00:00	6.978	2	Gulf of Alaska	1	Herring	1	152.583
2018-06-01 15:00:00	7.079	1	Gulf of Alaska	1	Herring	1	152.625
2018-06-01 16:00:00	6.978	1	Gulf of Alaska	1	Herring	1	152.667
2018-06-01 17:00:00	6.674	1	Gulf of Alaska	1	Herring	1	152.708
2018-06-01 18:00:00	6.674	0	Gulf of Alaska	1	Herring	1	152.75
2018-06-01 19:00:00	6.471	1	Gulf of Alaska	1	Herring	1	152.792
2018-06-01 20:00:00	6.674	0	Gulf of Alaska	1	Herring	1	152.833
2018-06-01 21:00:00	7.079	0	Gulf of Alaska	1	Herring	1	152.875
2018-06-01 22:00:00	7.179	0	Gulf of Alaska	1	Herring	1	152.917
2018-06-01 23:00:00	7.481	0	Gulf of Alaska	1	Herring	1	152.958
2018-06-02	6.978	0	Gulf of Alaska	1	Herring	1	153
2018-06-02 01:00:00	7.079	0	Gulf of Alaska	1	Herring	1	153.042
2018-06-02 02:00:00	7.079	0	Gulf of Alaska	1	Herring	1	153.083
2018-06-02 03:00:00	7.079	0	Gulf of Alaska	1	Herring	1	153.125
2018-06-02 04:00:00	7.179	0	Gulf of Alaska	1	Herring	1	153.167
2018-06-02 05:00:00	6.877	0	Gulf of Alaska	1	Herring	1	153.208
2018-06-02 06:00:00	6.471	0	Gulf of Alaska	1	Herring	1	153.25
2018-06-02 07:00:00	6.674	0	Gulf of Alaska	1	Herring	1	153.292
2018-06-02 08:00:00	6.573	0	Gulf of Alaska	1	Herring	1	153.333
2018-06-02 09:00:00	6.775	3	Gulf of Alaska	1	Herring	1	153.375
2018-06-02 10:00:00	7.381	8	Gulf of Alaska	1	Herring	1	153.417
2018-06-02 11:00:00	7.983	15	Gulf of Alaska	1	Herring	1	153.458
2018-06-02 12:00:00	8.082	9	Gulf of Alaska	1	Herring	1	153.5
2018-06-02 13:00:00	7.782	11	Gulf of Alaska	1	Herring	1	153.542
2018-06-02 14:00:00	7.481	4	Gulf of Alaska	1	Herring	1	153.583
2018-06-02 15:00:00	7.381	2	Gulf of Alaska	1	Herring	1	153.625
2018-06-02 16:00:00	7.682	0	Gulf of Alaska	1	Herring	1	153.667
2018-06-02 17:00:00	7.079	1	Gulf of Alaska	1	Herring	1	153.708
2018-06-02 18:00:00	6.573	1	Gulf of Alaska	1	Herring	1	153.75
2018-06-02 19:00:00	6.471	0	Gulf of Alaska	1	Herring	1	153.792
2018-06-02 20:00:00	6.573	0	Gulf of Alaska	1	Herring	1	153.833
2018-06-02 21:00:00	6.978	0	Gulf of Alaska	1	Herring	1	153.875
2018-06-02 22:00:00	7.882	0	Gulf of Alaska	1	Herring	1	153.917
2018-06-02 23:00:00	8.282	0	Gulf of Alaska	1	Herring	1	153.958
2018-06-03	7.381	0	Gulf of Alaska	1	Herring	1	154
2018-06-03 01:00:00	7.079	0	Gulf of Alaska	1	Herring	1	154.042
2018-06-03 02:00:00	7.079	0	Gulf of Alaska	1	Herring	1	154.083
2018-06-03 03:00:00	6.978	0	Gulf of Alaska	1	Herring	1	154.125
2018-06-03 04:00:00	6.877	0	Gulf of Alaska	1	Herring	1	154.167
2018-06-03 05:00:00	6.775	0	Gulf of Alaska	1	Herring	1	154.208
2018-06-03 06:00:00	6.573	0	Gulf of Alaska	1	Herring	1	154.25
2018-06-03 07:00:00	6.471	0	Gulf of Alaska	1	Herring	1	154.292
2018-06-03 08:00:00	6.471	0	Gulf of Alaska	1	Herring	1	154.333
2018-06-03 09:00:00	7.079	1	Gulf of Alaska	1	Herring	1	154.375
2018-06-03 10:00:00	6.877	10	Gulf of Alaska	1	Herring	1	154.417
2018-06-03 11:00:00	7.481	15	Gulf of Alaska	1	Herring	1	154.458
2018-06-03 12:00:00	7.682	15	Gulf of Alaska	1	Herring	1	154.5
2018-06-03 13:00:00	7.582	8	Gulf of Alaska	1	Herring	1	154.542
2018-06-03 14:00:00	7.381	4	Gulf of Alaska	1	Herring	1	154.583
2018-06-03 15:00:00	7.28	4	Gulf of Alaska	1	Herring	1	154.625
2018-06-03 16:00:00	7.28	1	Gulf of Alaska	1	Herring	1	154.667
2018-06-03 17:00:00	7.381	10	Gulf of Alaska	1	Herring	1	154.708
2018-06-03 18:00:00	6.877	2	Gulf of Alaska	1	Herring	1	154.75
2018-06-03 19:00:00	6.775	0	Gulf of Alaska	1	Herring	1	154.792
2018-06-03 20:00:00	6.674	0	Gulf of Alaska	1	Herring	1	154.833
2018-06-03 21:00:00	6.573	0	Gulf of Alaska	1	Herring	1	154.875
2018-06-03 22:00:00	6.573	0	Gulf of Alaska	1	Herring	1	154.917
2018-06-03 23:00:00	6.978	0	Gulf of Alaska	1	Herring	1	154.958
2018-06-04	6.978	0	Gulf of Alaska	1	Herring	1	155
2018-06-04 01:00:00	7.179	0	Gulf of Alaska	1	Herring	1	155.042
2018-06-04 02:00:00	7.381	0	Gulf of Alaska	1	Herring	1	155.083
2018-06-04 03:00:00	6.978	0	Gulf of Alaska	1	Herring	1	155.125
2018-06-04 04:00:00	7.079	0	Gulf of Alaska	1	Herring	1	155.167
2018-06-04 05:00:00	6.978	0	Gulf of Alaska	1	Herring	1	155.208
2018-06-04 06:00:00	6.877	0	Gulf of Alaska	1	Herring	1	155.25
2018-06-04 07:00:00	6.573	0	Gulf of Alaska	1	Herring	1	155.292
2018-06-04 08:00:00	6.573	0	Gulf of Alaska	1	Herring	1	155.333
2018-06-04 09:00:00	6.573	1	Gulf of Alaska	1	Herring	1	155.375
2018-06-04 10:00:00	6.674	2	Gulf of Alaska	1	Herring	1	155.417
2018-06-04 11:00:00	7.079	42	Gulf of Alaska	1	Herring	1	155.458
2018-06-04 12:00:00	7.481	2	Gulf of Alaska	1	Herring	1	155.5
2018-06-04 13:00:00	7.682	5	Gulf of Alaska	1	Herring	1	155.542
2018-06-04 14:00:00	7.582	1	Gulf of Alaska	1	Herring	1	155.583
2018-06-04 15:00:00	7.682	1	Gulf of Alaska	1	Herring	1	155.625
2018-06-04 16:00:00	7.882	0	Gulf of Alaska	1	Herring	1	155.667
2018-06-04 17:00:00	7.481	0	Gulf of Alaska	1	Herring	1	155.708
2018-06-04 18:00:00	7.079	1	Gulf of Alaska	1	Herring	1	155.75
2018-06-04 19:00:00	6.775	0	Gulf of Alaska	1	Herring	1	155.792
2018-06-04 20:00:00	6.674	1	Gulf of Alaska	1	Herring	1	155.833
2018-06-04 21:00:00	6.573	0	Gulf of Alaska	1	Herring	1	155.875
2018-06-04 22:00:00	6.573	0	Gulf of Alaska	1	Herring	1	155.917
2018-06-04 23:00:00	6.674	0	Gulf of Alaska	1	Herring	1	155.958
2018-06-05	7.079	0	Gulf of Alaska	1	Herring	1	156
2018-06-05 01:00:00	6.978	0	Gulf of Alaska	1	Herring	1	156.042
2018-06-05 02:00:00	7.079	0	Gulf of Alaska	1	Herring	1	156.083
2018-06-05 03:00:00	7.28	0	Gulf of Alaska	1	Herring	1	156.125
2018-06-05 04:00:00	7.381	0	Gulf of Alaska	1	Herring	1	156.167
2018-06-05 05:00:00	7.381	0	Gulf of Alaska	1	Herring	1	156.208
2018-06-05 06:00:00	7.381	0	Gulf of Alaska	1	Herring	1	156.25
2018-06-05 07:00:00	7.28	0	Gulf of Alaska	1	Herring	1	156.292
2018-06-05 08:00:00	6.775	0	Gulf of Alaska	1	Herring	1	156.333
2018-06-05 09:00:00	6.674	1	Gulf of Alaska	1	Herring	1	156.375
2018-06-05 10:00:00	6.674	7	Gulf of Alaska	1	Herring	1	156.417
2018-06-05 11:00:00	6.775	5	Gulf of Alaska	1	Herring	1	156.458
2018-06-05 12:00:00	7.28	2	Gulf of Alaska	1	Herring	1	156.5
2018-06-05 13:00:00	7.782	0	Gulf of Alaska	1	Herring	1	156.542
2018-06-05 14:00:00	7.682	1	Gulf of Alaska	1	Herring	1	156.583
2018-06-05 15:00:00	7.582	0	Gulf of Alaska	1	Herring	1	156.625
2018-06-05 16:00:00	7.582	1	Gulf of Alaska	1	Herring	1	156.667
2018-06-05 17:00:00	7.782	0	Gulf of Alaska	1	Herring	1	156.708
2018-06-05 18:00:00	7.582	0	Gulf of Alaska	1	Herring	1	156.75
2018-06-05 19:00:00	7.381	0	Gulf of Alaska	1	Herring	1	156.792
2018-06-05 20:00:00	6.877	2	Gulf of Alaska	1	Herring	1	156.833
2018-06-05 21:00:00	6.775	0	Gulf of Alaska	1	Herring	1	156.875
2018-06-05 22:00:00	6.674	0	Gulf of Alaska	1	Herring	1	156.917
2018-06-05 23:00:00	6.674	0	Gulf of Alaska	1	Herring	1	156.958
2018-06-06	6.877	0	Gulf of Alaska	1	Herring	1	157
2018-06-06 01:00:00	7.28	0	Gulf of Alaska	1	Herring	1	157.042
2018-06-06 02:00:00	7.28	0	Gulf of Alaska	1	Herring	1	157.083
2018-06-06 03:00:00	7.481	0	Gulf of Alaska	1	Herring	1	157.125
2018-06-06 04:00:00	7.582	0	Gulf of Alaska	1	Herring	1	157.167
2018-06-06 05:00:00	7.682	0	Gulf of Alaska	1	Herring	1	157.208
2018-06-06 06:00:00	7.582	0	Gulf of Alaska	1	Herring	1	157.25
2018-06-06 07:00:00	7.481	0	Gulf of Alaska	1	Herring	1	157.292
2018-06-06 08:00:00	7.481	0	Gulf of Alaska	1	Herring	1	157.333
2018-06-06 09:00:00	6.978	1	Gulf of Alaska	1	Herring	1	157.375
2018-06-06 10:00:00	6.775	5	Gulf of Alaska	1	Herring	1	157.417
2018-06-06 11:00:00	6.978	23	Gulf of Alaska	1	Herring	1	157.458
2018-06-06 12:00:00	7.28	24	Gulf of Alaska	1	Herring	1	157.5
2018-06-06 13:00:00	7.782	14	Gulf of Alaska	1	Herring	1	157.542
2018-06-06 14:00:00	7.882	28	Gulf of Alaska	1	Herring	1	157.583
2018-06-06 15:00:00	8.282	37	Gulf of Alaska	1	Herring	1	157.625
2018-06-06 16:00:00	8.382	26	Gulf of Alaska	1	Herring	1	157.667
2018-06-06 17:00:00	7.782	13	Gulf of Alaska	1	Herring	1	157.708
2018-06-06 18:00:00	7.983	8	Gulf of Alaska	1	Herring	1	157.75
2018-06-06 19:00:00	7.882	2	Gulf of Alaska	1	Herring	1	157.792
2018-06-06 20:00:00	7.381	3	Gulf of Alaska	1	Herring	1	157.833
2018-06-06 21:00:00	6.877	1	Gulf of Alaska	1	Herring	1	157.875
2018-06-06 22:00:00	6.775	0	Gulf of Alaska	1	Herring	1	157.917
2018-06-06 23:00:00	6.775	0	Gulf of Alaska	1	Herring	1	157.958
2018-06-07	7.079	0	Gulf of Alaska	1	Herring	1	158
2018-06-07 01:00:00	7.179	0	Gulf of Alaska	1	Herring	1	158.042
2018-06-07 02:00:00	7.381	0	Gulf of Alaska	1	Herring	1	158.083
2018-06-07 03:00:00	7.481	0	Gulf of Alaska	1	Herring	1	158.125
2018-06-07 04:00:00	7.481	0	Gulf of Alaska	1	Herring	1	158.167
2018-06-07 05:00:00	8.382	0	Gulf of Alaska	1	Herring	1	158.208
2018-06-07 06:00:00	8.082	0	Gulf of Alaska	1	Herring	1	158.25
2018-06-07 07:00:00	7.782	1	Gulf of Alaska	1	Herring	1	158.292
2018-06-07 08:00:00	7.582	3	Gulf of Alaska	1	Herring	1	158.333
2018-06-07 09:00:00	7.179	5	Gulf of Alaska	1	Herring	1	158.375
2018-06-07 10:00:00	7.079	9	Gulf of Alaska	1	Herring	1	158.417
2018-06-07 11:00:00	7.179	32	Gulf of Alaska	1	Herring	1	158.458
2018-06-07 12:00:00	7.381	91	Gulf of Alaska	1	Herring	1	158.5
2018-06-07 13:00:00	7.782	24	Gulf of Alaska	1	Herring	1	158.542
2018-06-07 14:00:00	8.382	208	Gulf of Alaska	1	Herring	1	158.583
2018-06-07 15:00:00	8.68	56	Gulf of Alaska	1	Herring	1	158.625
2018-06-07 16:00:00	8.879	63	Gulf of Alaska	1	Herring	1	158.667
2018-06-07 17:00:00	8.779	41	Gulf of Alaska	1	Herring	1	158.708
2018-06-07 18:00:00	8.581	6	Gulf of Alaska	1	Herring	1	158.75
2018-06-07 19:00:00	8.282	1	Gulf of Alaska	1	Herring	1	158.792
2018-06-07 20:00:00	8.282	0	Gulf of Alaska	1	Herring	1	158.833
2018-06-07 21:00:00	7.983	0	Gulf of Alaska	1	Herring	1	158.875
2018-06-07 22:00:00	7.28	0	Gulf of Alaska	1	Herring	1	158.917
2018-06-07 23:00:00	7.079	0	Gulf of Alaska	1	Herring	1	158.958
2018-06-08	7.179	0	Gulf of Alaska	1	Herring	1	159
2018-06-08 01:00:00	7.28	0	Gulf of Alaska	1	Herring	1	159.042
2018-06-08 02:00:00	7.481	0	Gulf of Alaska	1	Herring	1	159.083
2018-06-08 03:00:00	7.882	0	Gulf of Alaska	1	Herring	1	159.125
2018-06-08 04:00:00	8.978	0	Gulf of Alaska	1	Herring	1	159.167
2018-06-08 05:00:00	9.768	0	Gulf of Alaska	1	Herring	1	159.208
2018-06-08 06:00:00	9.669	0	Gulf of Alaska	1	Herring	1	159.25
2018-06-08 07:00:00	9.571	0	Gulf of Alaska	1	Herring	1	159.292
2018-06-08 08:00:00	9.472	0	Gulf of Alaska	1	Herring	1	159.333
2018-06-08 09:00:00	8.282	0	Gulf of Alaska	1	Herring	1	159.375
2018-06-08 10:00:00	8.282	1	Gulf of Alaska	1	Herring	1	159.417
2018-06-08 11:00:00	7.481	4	Gulf of Alaska	1	Herring	1	159.458
2018-06-08 12:00:00	7.381	6	Gulf of Alaska	1	Herring	1	159.5
2018-06-08 13:00:00	7.682	14	Gulf of Alaska	1	Herring	1	159.542
2018-06-08 14:00:00	7.983	31	Gulf of Alaska	1	Herring	1	159.583
2018-06-08 15:00:00	8.481	80	Gulf of Alaska	1	Herring	1	159.625
2018-06-08 16:00:00	9.866	120	Gulf of Alaska	1	Herring	1	159.667
2018-06-08 17:00:00	10.553	56	Gulf of Alaska	1	Herring	1	159.708
2018-06-08 18:00:00	10.455	33	Gulf of Alaska	1	Herring	1	159.75
2018-06-08 19:00:00	10.063	15	Gulf of Alaska	1	Herring	1	159.792
2018-06-08 20:00:00	9.768	3	Gulf of Alaska	1	Herring	1	159.833
2018-06-08 21:00:00	9.472	0	Gulf of Alaska	1	Herring	1	159.875
2018-06-08 22:00:00	9.373	0	Gulf of Alaska	1	Herring	1	159.917
2018-06-08 23:00:00	9.176	0	Gulf of Alaska	1	Herring	1	159.958
2018-06-09	9.373	0	Gulf of Alaska	1	Herring	1	160
2018-06-09 01:00:00	8.978	0	Gulf of Alaska	1	Herring	1	160.042
2018-06-09 02:00:00	9.077	0	Gulf of Alaska	1	Herring	1	160.083
2018-06-09 03:00:00	8.978	0	Gulf of Alaska	1	Herring	1	160.125
2018-06-09 04:00:00	8.68	0	Gulf of Alaska	1	Herring	1	160.167
2018-06-09 05:00:00	9.176	0	Gulf of Alaska	1	Herring	1	160.208
2018-06-09 06:00:00	9.472	0	Gulf of Alaska	1	Herring	1	160.25
2018-06-09 07:00:00	9.669	1	Gulf of Alaska	1	Herring	1	160.292
2018-06-09 08:00:00	9.768	1	Gulf of Alaska	1	Herring	1	160.333
2018-06-09 09:00:00	9.768	4	Gulf of Alaska	1	Herring	1	160.375
2018-06-09 10:00:00	9.472	4	Gulf of Alaska	1	Herring	1	160.417
2018-06-09 11:00:00	8.879	5	Gulf of Alaska	1	Herring	1	160.458
2018-06-09 12:00:00	8.382	5	Gulf of Alaska	1	Herring	1	160.5
2018-06-09 13:00:00	8.282	6	Gulf of Alaska	1	Herring	1	160.542
2018-06-09 14:00:00	8.282	6	Gulf of Alaska	1	Herring	1	160.583
2018-06-09 15:00:00	8.382	74	Gulf of Alaska	1	Herring	1	160.625
2018-06-09 16:00:00	9.176	56	Gulf of Alaska	1	Herring	1	160.667
2018-06-09 17:00:00	9.866	22	Gulf of Alaska	1	Herring	1	160.708
2018-06-09 18:00:00	10.455	5	Gulf of Alaska	1	Herring	1	160.75
2018-06-09 19:00:00	9.965	13	Gulf of Alaska	1	Herring	1	160.792
2018-06-09 20:00:00	9.472	4	Gulf of Alaska	1	Herring	1	160.833
2018-06-09 21:00:00	9.571	1	Gulf of Alaska	1	Herring	1	160.875
2018-06-09 22:00:00	9.866	0	Gulf of Alaska	1	Herring	1	160.917
2018-06-09 23:00:00	9.768	0	Gulf of Alaska	1	Herring	1	160.958
2018-06-10	9.669	0	Gulf of Alaska	1	Herring	1	161
2018-06-10 01:00:00	8.779	0	Gulf of Alaska	1	Herring	1	161.042
2018-06-10 02:00:00	8.481	0	Gulf of Alaska	1	Herring	1	161.083
2018-06-10 03:00:00	9.176	0	Gulf of Alaska	1	Herring	1	161.125
2018-06-10 04:00:00	9.176	0	Gulf of Alaska	1	Herring	1	161.167
2018-06-10 05:00:00	9.768	0	Gulf of Alaska	1	Herring	1	161.208
2018-06-10 06:00:00	10.063	0	Gulf of Alaska	1	Herring	1	161.25
2018-06-10 07:00:00	10.161	0	Gulf of Alaska	1	Herring	1	161.292
2018-06-10 08:00:00	10.161	1	Gulf of Alaska	1	Herring	1	161.333
2018-06-10 09:00:00	10.161	7	Gulf of Alaska	1	Herring	1	161.375
2018-06-10 10:00:00	9.768	11	Gulf of Alaska	1	Herring	1	161.417
2018-06-10 11:00:00	9.571	12	Gulf of Alaska	1	Herring	1	161.458
2018-06-10 12:00:00	8.68	8	Gulf of Alaska	1	Herring	1	161.5
2018-06-10 13:00:00	8.082	13	Gulf of Alaska	1	Herring	1	161.542
2018-06-10 14:00:00	7.481	34	Gulf of Alaska	1	Herring	1	161.583
2018-06-10 15:00:00	7.882	16	Gulf of Alaska	1	Herring	1	161.625
2018-06-10 16:00:00	7.782	23	Gulf of Alaska	1	Herring	1	161.667
2018-06-10 17:00:00	9.176	10	Gulf of Alaska	1	Herring	1	161.708
2018-06-10 18:00:00	9.669	31	Gulf of Alaska	1	Herring	1	161.75
2018-06-10 19:00:00	10.455	12	Gulf of Alaska	1	Herring	1	161.792
2018-06-10 20:00:00	9.669	2	Gulf of Alaska	1	Herring	1	161.833
2018-06-10 21:00:00	9.472	0	Gulf of Alaska	1	Herring	1	161.875
2018-06-10 22:00:00	9.472	0	Gulf of Alaska	1	Herring	1	161.917
2018-06-10 23:00:00	9.077	0	Gulf of Alaska	1	Herring	1	161.958
2018-06-11	9.275	0	Gulf of Alaska	1	Herring	1	162
2018-06-11 01:00:00	8.382	0	Gulf of Alaska	1	Herring	1	162.042
2018-06-11 02:00:00	7.582	0	Gulf of Alaska	1	Herring	1	162.083
2018-06-11 03:00:00	7.682	0	Gulf of Alaska	1	Herring	1	162.125
2018-06-11 04:00:00	7.782	0	Gulf of Alaska	1	Herring	1	162.167
2018-06-11 05:00:00	8.581	0	Gulf of Alaska	1	Herring	1	162.208
2018-06-11 06:00:00	9.669	2	Gulf of Alaska	1	Herring	1	162.25
2018-06-11 07:00:00	10.063	7	Gulf of Alaska	1	Herring	1	162.292
2018-06-11 08:00:00	9.768	6	Gulf of Alaska	1	Herring	1	162.333
2018-06-11 09:00:00	9.768	3	Gulf of Alaska	1	Herring	1	162.375
2018-06-11 10:00:00	9.866	5	Gulf of Alaska	1	Herring	1	162.417
2018-06-11 11:00:00	9.373	15	Gulf of Alaska	1	Herring	1	162.458
2018-06-11 12:00:00	8.481	10	Gulf of Alaska	1	Herring	1	162.5
2018-06-11 13:00:00	8.182	7	Gulf of Alaska	1	Herring	1	162.542
2018-06-11 14:00:00	8.481	5	Gulf of Alaska	1	Herring	1	162.583
2018-06-11 15:00:00	7.582	3	Gulf of Alaska	1	Herring	1	162.625
2018-06-11 16:00:00	8.082	41	Gulf of Alaska	1	Herring	1	162.667
2018-06-11 17:00:00	8.978	28	Gulf of Alaska	1	Herring	1	162.708
2018-06-11 18:00:00	9.373	10	Gulf of Alaska	1	Herring	1	162.75
2018-06-11 19:00:00	10.259	20	Gulf of Alaska	1	Herring	1	162.792
2018-06-11 20:00:00	10.259	11	Gulf of Alaska	1	Herring	1	162.833
2018-06-11 21:00:00	10.651	3	Gulf of Alaska	1	Herring	1	162.875
2018-06-11 22:00:00	9.472	0	Gulf of Alaska	1	Herring	1	162.917
2018-06-11 23:00:00	9.176	0	Gulf of Alaska	1	Herring	1	162.958
2018-06-12	9.077	0	Gulf of Alaska	1	Herring	1	163
2018-06-12 01:00:00	7.983	0	Gulf of Alaska	1	Herring	1	163.042
2018-06-12 02:00:00	7.682	0	Gulf of Alaska	1	Herring	1	163.083
2018-06-12 03:00:00	7.582	0	Gulf of Alaska	1	Herring	1	163.125
2018-06-12 04:00:00	7.582	0	Gulf of Alaska	1	Herring	1	163.167
2018-06-12 05:00:00	7.682	0	Gulf of Alaska	1	Herring	1	163.208
2018-06-12 06:00:00	8.779	0	Gulf of Alaska	1	Herring	1	163.25
2018-06-12 07:00:00	9.965	4	Gulf of Alaska	1	Herring	1	163.292
2018-06-12 08:00:00	10.161	15	Gulf of Alaska	1	Herring	1	163.333
2018-06-12 09:00:00	9.965	5	Gulf of Alaska	1	Herring	1	163.375
2018-06-12 10:00:00	9.768	6	Gulf of Alaska	1	Herring	1	163.417
2018-06-12 11:00:00	9.472	5	Gulf of Alaska	1	Herring	1	163.458
2018-06-12 12:00:00	9.077	8	Gulf of Alaska	1	Herring	1	163.5
2018-06-12 13:00:00	8.68	6	Gulf of Alaska	1	Herring	1	163.542
2018-06-12 14:00:00	7.983	5	Gulf of Alaska	1	Herring	1	163.583
2018-06-12 15:00:00	7.882	3	Gulf of Alaska	1	Herring	1	163.625
2018-06-12 16:00:00	7.481	4	Gulf of Alaska	1	Herring	1	163.667
2018-06-12 17:00:00	7.983	13	Gulf of Alaska	1	Herring	1	163.708
2018-06-12 18:00:00	9.472	11	Gulf of Alaska	1	Herring	1	163.75
2018-06-12 19:00:00	9.275	8	Gulf of Alaska	1	Herring	1	163.792
2018-06-12 20:00:00	9.965	6	Gulf of Alaska	1	Herring	1	163.833
2018-06-12 21:00:00	10.651	3	Gulf of Alaska	1	Herring	1	163.875
2018-06-12 22:00:00	10.553	0	Gulf of Alaska	1	Herring	1	163.917
2018-06-12 23:00:00	10.063	0	Gulf of Alaska	1	Herring	1	163.958
2018-06-13	8.879	0	Gulf of Alaska	1	Herring	1	164
2018-06-13 01:00:00	8.581	0	Gulf of Alaska	1	Herring	1	164.042
2018-06-13 02:00:00	7.782	0	Gulf of Alaska	1	Herring	1	164.083
2018-06-13 03:00:00	7.481	0	Gulf of Alaska	1	Herring	1	164.125
2018-06-13 04:00:00	7.381	0	Gulf of Alaska	1	Herring	1	164.167
2018-06-13 05:00:00	7.481	0	Gulf of Alaska	1	Herring	1	164.208
2018-06-13 06:00:00	8.382	0	Gulf of Alaska	1	Herring	1	164.25
2018-06-13 07:00:00	9.373	4	Gulf of Alaska	1	Herring	1	164.292
2018-06-13 08:00:00	9.866	10	Gulf of Alaska	1	Herring	1	164.333
2018-06-13 09:00:00	10.161	41	Gulf of Alaska	1	Herring	1	164.375
2018-06-13 10:00:00	10.357	26	Gulf of Alaska	1	Herring	1	164.417
2018-06-13 11:00:00	10.063	7	Gulf of Alaska	1	Herring	1	164.458
2018-06-13 12:00:00	8.581	5	Gulf of Alaska	1	Herring	1	164.5
2018-06-13 13:00:00	8.481	7	Gulf of Alaska	1	Herring	1	164.542
2018-06-13 14:00:00	7.882	12	Gulf of Alaska	1	Herring	1	164.583
2018-06-13 15:00:00	7.682	11	Gulf of Alaska	1	Herring	1	164.625
2018-06-13 16:00:00	7.682	21	Gulf of Alaska	1	Herring	1	164.667
2018-06-13 17:00:00	7.481	16	Gulf of Alaska	1	Herring	1	164.708
2018-06-13 18:00:00	7.882	9	Gulf of Alaska	1	Herring	1	164.75
2018-06-13 19:00:00	8.879	8	Gulf of Alaska	1	Herring	1	164.792
2018-06-13 20:00:00	9.373	3	Gulf of Alaska	1	Herring	1	164.833
2018-06-13 21:00:00	10.259	6	Gulf of Alaska	1	Herring	1	164.875
2018-06-13 22:00:00	10.161	0	Gulf of Alaska	1	Herring	1	164.917
2018-06-13 23:00:00	9.768	0	Gulf of Alaska	1	Herring	1	164.958
2018-06-14	8.779	0	Gulf of Alaska	1	Herring	1	165
2018-06-14 01:00:00	8.779	0	Gulf of Alaska	1	Herring	1	165.042
2018-06-14 02:00:00	8.282	0	Gulf of Alaska	1	Herring	1	165.083
2018-06-14 03:00:00	7.582	0	Gulf of Alaska	1	Herring	1	165.125
2018-06-14 04:00:00	7.481	0	Gulf of Alaska	1	Herring	1	165.167
2018-06-14 05:00:00	7.481	0	Gulf of Alaska	1	Herring	1	165.208
2018-06-14 06:00:00	8.082	0	Gulf of Alaska	1	Herring	1	165.25
2018-06-14 07:00:00	7.882	0	Gulf of Alaska	1	Herring	1	165.292
2018-06-14 08:00:00	9.176	2	Gulf of Alaska	1	Herring	1	165.333
2018-06-14 09:00:00	9.571	48	Gulf of Alaska	1	Herring	1	165.375
2018-06-14 10:00:00	10.357	90	Gulf of Alaska	1	Herring	1	165.417
2018-06-14 11:00:00	10.455	52	Gulf of Alaska	1	Herring	1	165.458
2018-06-14 12:00:00	8.68	20	Gulf of Alaska	1	Herring	1	165.5
2018-06-14 13:00:00	8.282	7	Gulf of Alaska	1	Herring	1	165.542
2018-06-14 14:00:00	8.182	37	Gulf of Alaska	1	Herring	1	165.583
2018-06-14 15:00:00	7.882	25	Gulf of Alaska	1	Herring	1	165.625
2018-06-14 16:00:00	7.582	5	Gulf of Alaska	1	Herring	1	165.667
2018-06-14 17:00:00	7.381	16	Gulf of Alaska	1	Herring	1	165.708
2018-06-14 18:00:00	7.381	9	Gulf of Alaska	1	Herring	1	165.75
2018-06-14 19:00:00	7.582	9	Gulf of Alaska	1	Herring	1	165.792
2018-06-14 20:00:00	8.879	6	Gulf of Alaska	1	Herring	1	165.833
2018-06-14 21:00:00	9.669	1	Gulf of Alaska	1	Herring	1	165.875
2018-06-14 22:00:00	8.282	1	Gulf of Alaska	1	Herring	1	165.917
2018-06-14 23:00:00	8.481	0	Gulf of Alaska	1	Herring	1	165.958
2018-06-15	8.581	0	Gulf of Alaska	1	Herring	1	166
2018-06-15 01:00:00	8.182	0	Gulf of Alaska	1	Herring	1	166.042
2018-06-15 02:00:00	7.682	0	Gulf of Alaska	1	Herring	1	166.083
2018-06-15 03:00:00	7.582	0	Gulf of Alaska	1	Herring	1	166.125
2018-06-15 04:00:00	7.481	0	Gulf of Alaska	1	Herring	1	166.167
2018-06-15 05:00:00	7.381	0	Gulf of Alaska	1	Herring	1	166.208
2018-06-15 06:00:00	7.381	0	Gulf of Alaska	1	Herring	1	166.25
2018-06-15 07:00:00	7.28	0	Gulf of Alaska	1	Herring	1	166.292
2018-06-15 08:00:00	7.582	0	Gulf of Alaska	1	Herring	1	166.333
2018-06-15 09:00:00	7.682	2	Gulf of Alaska	1	Herring	1	166.375
2018-06-15 10:00:00	7.882	11	Gulf of Alaska	1	Herring	1	166.417
2018-06-15 11:00:00	7.983	12	Gulf of Alaska	1	Herring	1	166.458
2018-06-15 12:00:00	7.983	15	Gulf of Alaska	1	Herring	1	166.5
2018-06-15 13:00:00	7.782	17	Gulf of Alaska	1	Herring	1	166.542
2018-06-15 14:00:00	7.782	5	Gulf of Alaska	1	Herring	1	166.583
2018-06-15 15:00:00	7.682	1	Gulf of Alaska	1	Herring	1	166.625
2018-06-15 16:00:00	7.682	0	Gulf of Alaska	1	Herring	1	166.667
2018-06-15 17:00:00	7.481	0	Gulf of Alaska	1	Herring	1	166.708
2018-06-15 18:00:00	7.381	0	Gulf of Alaska	1	Herring	1	166.75
2018-06-15 19:00:00	7.381	0	Gulf of Alaska	1	Herring	1	166.792
2018-06-15 20:00:00	7.481	1	Gulf of Alaska	1	Herring	1	166.833
2018-06-15 21:00:00	7.582	1	Gulf of Alaska	1	Herring	1	166.875
2018-06-15 22:00:00	7.682	0	Gulf of Alaska	1	Herring	1	166.917
2018-06-15 23:00:00	7.582	0	Gulf of Alaska	1	Herring	1	166.958
2018-06-16	7.682	0	Gulf of Alaska	1	Herring	1	167
2018-06-16 01:00:00	7.782	0	Gulf of Alaska	1	Herring	1	167.042
2018-06-16 02:00:00	7.682	0	Gulf of Alaska	1	Herring	1	167.083
2018-06-16 03:00:00	7.682	0	Gulf of Alaska	1	Herring	1	167.125
2018-06-16 04:00:00	7.481	0	Gulf of Alaska	1	Herring	1	167.167
2018-06-16 05:00:00	7.28	0	Gulf of Alaska	1	Herring	1	167.208
2018-06-16 06:00:00	7.28	0	Gulf of Alaska	1	Herring	1	167.25
2018-06-16 07:00:00	7.28	0	Gulf of Alaska	1	Herring	1	167.292
2018-06-16 08:00:00	7.28	0	Gulf of Alaska	1	Herring	1	167.333
2018-06-16 09:00:00	7.381	4	Gulf of Alaska	1	Herring	1	167.375
2018-06-16 10:00:00	7.582	12	Gulf of Alaska	1	Herring	1	167.417
2018-06-16 11:00:00	8.182	83	Gulf of Alaska	1	Herring	1	167.458
2018-06-16 12:00:00	8.082	57	Gulf of Alaska	1	Herring	1	167.5
2018-06-16 13:00:00	7.782	5	Gulf of Alaska	1	Herring	1	167.542
2018-06-16 14:00:00	7.582	2	Gulf of Alaska	1	Herring	1	167.583
2018-06-16 15:00:00	7.682	14	Gulf of Alaska	1	Herring	1	167.625
2018-06-16 16:00:00	7.682	1	Gulf of Alaska	1	Herring	1	167.667
2018-06-16 17:00:00	7.381	0	Gulf of Alaska	1	Herring	1	167.708
2018-06-16 18:00:00	7.28	0	Gulf of Alaska	1	Herring	1	167.75
2018-06-16 19:00:00	7.381	0	Gulf of Alaska	1	Herring	1	167.792
2018-06-16 20:00:00	7.481	0	Gulf of Alaska	1	Herring	1	167.833
2018-06-16 21:00:00	7.582	0	Gulf of Alaska	1	Herring	1	167.875
2018-06-16 22:00:00	7.481	0	Gulf of Alaska	1	Herring	1	167.917
2018-06-16 23:00:00	7.582	0	Gulf of Alaska	1	Herring	1	167.958
2018-06-17	7.481	0	Gulf of Alaska	1	Herring	1	168
2018-06-17 01:00:00	7.582	0	Gulf of Alaska	1	Herring	1	168.042
2018-06-17 02:00:00	7.582	0	Gulf of Alaska	1	Herring	1	168.083
2018-06-17 03:00:00	7.582	0	Gulf of Alaska	1	Herring	1	168.125
2018-06-17 04:00:00	7.582	0	Gulf of Alaska	1	Herring	1	168.167
2018-06-17 05:00:00	7.381	0	Gulf of Alaska	1	Herring	1	168.208
2018-06-17 06:00:00	7.28	0	Gulf of Alaska	1	Herring	1	168.25
2018-06-17 07:00:00	7.381	0	Gulf of Alaska	1	Herring	1	168.292
2018-06-17 08:00:00	7.381	0	Gulf of Alaska	1	Herring	1	168.333
2018-06-17 09:00:00	7.381	0	Gulf of Alaska	1	Herring	1	168.375
2018-06-17 10:00:00	7.481	0	Gulf of Alaska	1	Herring	1	168.417
2018-06-17 11:00:00	7.481	13	Gulf of Alaska	1	Herring	1	168.458
2018-06-17 12:00:00	7.682	12	Gulf of Alaska	1	Herring	1	168.5
2018-06-17 13:00:00	7.782	5	Gulf of Alaska	1	Herring	1	168.542
2018-06-17 14:00:00	7.582	13	Gulf of Alaska	1	Herring	1	168.583
2018-06-17 15:00:00	7.481	0	Gulf of Alaska	1	Herring	1	168.625
2018-06-17 16:00:00	7.582	0	Gulf of Alaska	1	Herring	1	168.667
2018-06-17 17:00:00	7.582	0	Gulf of Alaska	1	Herring	1	168.708
2018-06-17 18:00:00	7.381	0	Gulf of Alaska	1	Herring	1	168.75
2018-06-17 19:00:00	7.28	0	Gulf of Alaska	1	Herring	1	168.792
2018-06-17 20:00:00	7.28	0	Gulf of Alaska	1	Herring	1	168.833
2018-06-17 21:00:00	7.28	0	Gulf of Alaska	1	Herring	1	168.875
2018-06-17 22:00:00	7.381	0	Gulf of Alaska	1	Herring	1	168.917
2018-06-17 23:00:00	7.481	0	Gulf of Alaska	1	Herring	1	168.958
2018-06-18	7.481	0	Gulf of Alaska	1	Herring	1	169
2018-06-18 01:00:00	7.381	0	Gulf of Alaska	1	Herring	1	169.042
2018-06-18 02:00:00	7.481	0	Gulf of Alaska	1	Herring	1	169.083
2018-06-18 03:00:00	7.481	0	Gulf of Alaska	1	Herring	1	169.125
2018-06-18 04:00:00	7.481	0	Gulf of Alaska	1	Herring	1	169.167
2018-06-18 05:00:00	7.481	0	Gulf of Alaska	1	Herring	1	169.208
2018-06-18 06:00:00	7.28	0	Gulf of Alaska	1	Herring	1	169.25
2018-06-18 07:00:00	7.28	0	Gulf of Alaska	1	Herring	1	169.292
2018-06-18 08:00:00	7.28	0	Gulf of Alaska	1	Herring	1	169.333
2018-06-18 09:00:00	7.28	0	Gulf of Alaska	1	Herring	1	169.375
2018-06-18 10:00:00	7.28	2	Gulf of Alaska	1	Herring	1	169.417
2018-06-18 11:00:00	7.481	11	Gulf of Alaska	1	Herring	1	169.458
2018-06-18 12:00:00	7.782	200	Gulf of Alaska	1	Herring	1	169.5
2018-06-18 13:00:00	7.882	608	Gulf of Alaska	1	Herring	1	169.542
2018-06-18 14:00:00	7.782	118	Gulf of Alaska	1	Herring	1	169.583
2018-06-18 15:00:00	7.682	21	Gulf of Alaska	1	Herring	1	169.625
2018-06-18 16:00:00	7.682	29	Gulf of Alaska	1	Herring	1	169.667
2018-06-18 17:00:00	7.682	17	Gulf of Alaska	1	Herring	1	169.708
2018-06-18 18:00:00	7.481	10	Gulf of Alaska	1	Herring	1	169.75
2018-06-18 19:00:00	7.381	2	Gulf of Alaska	1	Herring	1	169.792
2018-06-18 20:00:00	7.28	0	Gulf of Alaska	1	Herring	1	169.833
2018-06-18 21:00:00	7.28	0	Gulf of Alaska	1	Herring	1	169.875
2018-06-18 22:00:00	7.28	0	Gulf of Alaska	1	Herring	1	169.917
2018-06-18 23:00:00	7.28	0	Gulf of Alaska	1	Herring	1	169.958
2018-06-19	7.582	0	Gulf of Alaska	1	Herring	1	170
2018-06-19 01:00:00	7.582	0	Gulf of Alaska	1	Herring	1	170.042
2018-06-19 02:00:00	7.381	0	Gulf of Alaska	1	Herring	1	170.083
2018-06-19 03:00:00	7.481	0	Gulf of Alaska	1	Herring	1	170.125
2018-06-19 04:00:00	7.481	0	Gulf of Alaska	1	Herring	1	170.167
2018-06-19 05:00:00	7.381	0	Gulf of Alaska	1	Herring	1	170.208
2018-06-19 06:00:00	7.481	0	Gulf of Alaska	1	Herring	1	170.25
2018-06-19 07:00:00	7.28	0	Gulf of Alaska	1	Herring	1	170.292
2018-06-19 08:00:00	7.28	0	Gulf of Alaska	1	Herring	1	170.333
2018-06-19 09:00:00	7.28	1	Gulf of Alaska	1	Herring	1	170.375
2018-06-19 10:00:00	7.381	6	Gulf of Alaska	1	Herring	1	170.417
2018-06-19 11:00:00	7.381	9	Gulf of Alaska	1	Herring	1	170.458
2018-06-19 12:00:00	7.381	14	Gulf of Alaska	1	Herring	1	170.5
2018-06-19 13:00:00	7.682	100	Gulf of Alaska	1	Herring	1	170.542
2018-06-19 14:00:00	7.882	57	Gulf of Alaska	1	Herring	1	170.583
2018-06-19 15:00:00	7.983	19	Gulf of Alaska	1	Herring	1	170.625
2018-06-19 16:00:00	7.882	39	Gulf of Alaska	1	Herring	1	170.667
2018-06-19 17:00:00	7.782	5	Gulf of Alaska	1	Herring	1	170.708
2018-06-19 18:00:00	7.582	3	Gulf of Alaska	1	Herring	1	170.75
2018-06-19 19:00:00	7.381	5	Gulf of Alaska	1	Herring	1	170.792
2018-06-19 20:00:00	7.28	1	Gulf of Alaska	1	Herring	1	170.833
2018-06-19 21:00:00	7.28	0	Gulf of Alaska	1	Herring	1	170.875
2018-06-19 22:00:00	7.381	0	Gulf of Alaska	1	Herring	1	170.917
2018-06-19 23:00:00	7.381	0	Gulf of Alaska	1	Herring	1	170.958
2018-06-20	7.481	0	Gulf of Alaska	1	Herring	1	171
2018-06-20 01:00:00	7.582	0	Gulf of Alaska	1	Herring	1	171.042
2018-06-20 02:00:00	7.682	0	Gulf of Alaska	1	Herring	1	171.083
2018-06-20 03:00:00	7.582	0	Gulf of Alaska	1	Herring	1	171.125
2018-06-20 04:00:00	7.882	0	Gulf of Alaska	1	Herring	1	171.167
2018-06-20 05:00:00	7.682	0	Gulf of Alaska	1	Herring	1	171.208
2018-06-20 06:00:00	7.782	0	Gulf of Alaska	1	Herring	1	171.25
2018-06-20 07:00:00	7.682	1	Gulf of Alaska	1	Herring	1	171.292
2018-06-20 08:00:00	7.481	2	Gulf of Alaska	1	Herring	1	171.333
2018-06-20 09:00:00	7.381	5	Gulf of Alaska	1	Herring	1	171.375
2018-06-20 10:00:00	7.381	8	Gulf of Alaska	1	Herring	1	171.417
2018-06-20 11:00:00	7.481	23	Gulf of Alaska	1	Herring	1	171.458
2018-06-20 12:00:00	7.381	17	Gulf of Alaska	1	Herring	1	171.5
2018-06-20 13:00:00	7.682	72	Gulf of Alaska	1	Herring	1	171.542
2018-06-20 14:00:00	8.082	61	Gulf of Alaska	1	Herring	1	171.583
2018-06-20 15:00:00	8.282	19	Gulf of Alaska	1	Herring	1	171.625
2018-06-20 16:00:00	7.882	9	Gulf of Alaska	1	Herring	1	171.667
2018-06-20 17:00:00	7.983	19	Gulf of Alaska	1	Herring	1	171.708
2018-06-20 18:00:00	7.983	10	Gulf of Alaska	1	Herring	1	171.75
2018-06-20 19:00:00	7.983	5	Gulf of Alaska	1	Herring	1	171.792
2018-06-20 20:00:00	7.682	1	Gulf of Alaska	1	Herring	1	171.833
2018-06-20 21:00:00	7.381	1	Gulf of Alaska	1	Herring	1	171.875
2018-06-20 22:00:00	7.381	0	Gulf of Alaska	1	Herring	1	171.917
2018-06-20 23:00:00	7.481	0	Gulf of Alaska	1	Herring	1	171.958
2018-06-21	7.481	0	Gulf of Alaska	1	Herring	1	172
2018-06-21 01:00:00	7.582	0	Gulf of Alaska	1	Herring	1	172.042
2018-06-21 02:00:00	7.882	0	Gulf of Alaska	1	Herring	1	172.083
2018-06-21 03:00:00	8.082	0	Gulf of Alaska	1	Herring	1	172.125
2018-06-21 04:00:00	8.382	0	Gulf of Alaska	1	Herring	1	172.167
2018-06-21 05:00:00	8.382	0	Gulf of Alaska	1	Herring	1	172.208
2018-06-21 06:00:00	8.182	0	Gulf of Alaska	1	Herring	1	172.25
2018-06-21 07:00:00	7.882	2	Gulf of Alaska	1	Herring	1	172.292
2018-06-21 08:00:00	7.682	2	Gulf of Alaska	1	Herring	1	172.333
2018-06-21 09:00:00	7.481	1	Gulf of Alaska	1	Herring	1	172.375
2018-06-21 10:00:00	7.481	5	Gulf of Alaska	1	Herring	1	172.417
2018-06-21 11:00:00	7.381	12	Gulf of Alaska	1	Herring	1	172.458
2018-06-21 12:00:00	7.381	8	Gulf of Alaska	1	Herring	1	172.5
2018-06-21 13:00:00	7.582	14	Gulf of Alaska	1	Herring	1	172.542
2018-06-21 14:00:00	7.882	13	Gulf of Alaska	1	Herring	1	172.583
2018-06-21 15:00:00	7.983	35	Gulf of Alaska	1	Herring	1	172.625
2018-06-21 16:00:00	8.382	38	Gulf of Alaska	1	Herring	1	172.667
2018-06-21 17:00:00	8.382	24	Gulf of Alaska	1	Herring	1	172.708
2018-06-21 18:00:00	8.182	16	Gulf of Alaska	1	Herring	1	172.75
2018-06-21 19:00:00	7.983	7	Gulf of Alaska	1	Herring	1	172.792
2018-06-21 20:00:00	7.882	1	Gulf of Alaska	1	Herring	1	172.833
2018-06-21 21:00:00	7.582	0	Gulf of Alaska	1	Herring	1	172.875
2018-06-21 22:00:00	7.481	0	Gulf of Alaska	1	Herring	1	172.917
2018-06-21 23:00:00	7.481	0	Gulf of Alaska	1	Herring	1	172.958
2018-06-22	7.481	0	Gulf of Alaska	1	Herring	1	173
2018-06-22 01:00:00	7.381	0	Gulf of Alaska	1	Herring	1	173.042
2018-06-22 02:00:00	7.582	0	Gulf of Alaska	1	Herring	1	173.083
2018-06-22 03:00:00	7.882	0	Gulf of Alaska	1	Herring	1	173.125
2018-06-22 04:00:00	8.082	0	Gulf of Alaska	1	Herring	1	173.167
2018-06-22 05:00:00	8.581	0	Gulf of Alaska	1	Herring	1	173.208
2018-06-22 06:00:00	8.282	1	Gulf of Alaska	1	Herring	1	173.25
2018-06-22 07:00:00	8.182	5	Gulf of Alaska	1	Herring	1	173.292
2018-06-22 08:00:00	8.082	7	Gulf of Alaska	1	Herring	1	173.333
2018-06-22 09:00:00	7.983	8	Gulf of Alaska	1	Herring	1	173.375
2018-06-22 10:00:00	7.582	11	Gulf of Alaska	1	Herring	1	173.417
2018-06-22 11:00:00	7.481	21	Gulf of Alaska	1	Herring	1	173.458
2018-06-22 12:00:00	7.481	26	Gulf of Alaska	1	Herring	1	173.5
2018-06-22 13:00:00	7.381	20	Gulf of Alaska	1	Herring	1	173.542
2018-06-22 14:00:00	7.381	43	Gulf of Alaska	1	Herring	1	173.583
2018-06-22 15:00:00	7.682	85	Gulf of Alaska	1	Herring	1	173.625
2018-06-22 16:00:00	8.182	66	Gulf of Alaska	1	Herring	1	173.667
2018-06-22 17:00:00	8.382	63	Gulf of Alaska	1	Herring	1	173.708
2018-06-22 18:00:00	8.481	23	Gulf of Alaska	1	Herring	1	173.75
2018-06-22 19:00:00	8.082	13	Gulf of Alaska	1	Herring	1	173.792
2018-06-22 20:00:00	8.082	6	Gulf of Alaska	1	Herring	1	173.833
2018-06-22 21:00:00	7.882	2	Gulf of Alaska	1	Herring	1	173.875
2018-06-22 22:00:00	7.582	0	Gulf of Alaska	1	Herring	1	173.917
2018-06-22 23:00:00	7.481	0	Gulf of Alaska	1	Herring	1	173.958
2018-06-23	7.481	0	Gulf of Alaska	1	Herring	1	174
2018-06-23 01:00:00	7.381	0	Gulf of Alaska	1	Herring	1	174.042
2018-06-23 02:00:00	7.381	0	Gulf of Alaska	1	Herring	1	174.083
2018-06-23 03:00:00	7.381	0	Gulf of Alaska	1	Herring	1	174.125
2018-06-23 04:00:00	7.481	0	Gulf of Alaska	1	Herring	1	174.167
2018-06-23 05:00:00	7.882	0	Gulf of Alaska	1	Herring	1	174.208
2018-06-23 06:00:00	7.983	0	Gulf of Alaska	1	Herring	1	174.25
2018-06-23 07:00:00	7.983	4	Gulf of Alaska	1	Herring	1	174.292
2018-06-23 08:00:00	8.082	9	Gulf of Alaska	1	Herring	1	174.333
2018-06-23 09:00:00	8.082	11	Gulf of Alaska	1	Herring	1	174.375
2018-06-23 10:00:00	7.782	13	Gulf of Alaska	1	Herring	1	174.417
2018-06-23 11:00:00	7.782	11	Gulf of Alaska	1	Herring	1	174.458
2018-06-23 12:00:00	7.582	8	Gulf of Alaska	1	Herring	1	174.5
2018-06-23 13:00:00	7.481	10	Gulf of Alaska	1	Herring	1	174.542
2018-06-23 14:00:00	7.481	16	Gulf of Alaska	1	Herring	1	174.583
2018-06-23 15:00:00	7.481	17	Gulf of Alaska	1	Herring	1	174.625
2018-06-23 16:00:00	7.682	17	Gulf of Alaska	1	Herring	1	174.667
2018-06-23 17:00:00	8.182	22	Gulf of Alaska	1	Herring	1	174.708
2018-06-23 18:00:00	8.382	31	Gulf of Alaska	1	Herring	1	174.75
2018-06-23 19:00:00	8.182	18	Gulf of Alaska	1	Herring	1	174.792
2018-06-23 20:00:00	8.282	7	Gulf of Alaska	1	Herring	1	174.833
2018-06-23 21:00:00	7.882	1	Gulf of Alaska	1	Herring	1	174.875
2018-06-23 22:00:00	7.882	0	Gulf of Alaska	1	Herring	1	174.917
2018-06-23 23:00:00	7.882	0	Gulf of Alaska	1	Herring	1	174.958
2018-06-24	7.582	0	Gulf of Alaska	1	Herring	1	175
2018-06-24 01:00:00	7.481	0	Gulf of Alaska	1	Herring	1	175.042
2018-06-24 02:00:00	7.481	0	Gulf of Alaska	1	Herring	1	175.083
2018-06-24 03:00:00	7.481	0	Gulf of Alaska	1	Herring	1	175.125
2018-06-24 04:00:00	7.582	0	Gulf of Alaska	1	Herring	1	175.167
2018-06-24 05:00:00	7.782	0	Gulf of Alaska	1	Herring	1	175.208
2018-06-24 06:00:00	8.382	1	Gulf of Alaska	1	Herring	1	175.25
2018-06-24 07:00:00	8.68	6	Gulf of Alaska	1	Herring	1	175.292
2018-06-24 08:00:00	8.481	16	Gulf of Alaska	1	Herring	1	175.333
2018-06-24 09:00:00	8.282	10	Gulf of Alaska	1	Herring	1	175.375
2018-06-24 10:00:00	8.082	9	Gulf of Alaska	1	Herring	1	175.417
2018-06-24 11:00:00	7.882	22	Gulf of Alaska	1	Herring	1	175.458
2018-06-24 12:00:00	7.682	12	Gulf of Alaska	1	Herring	1	175.5
2018-06-24 13:00:00	7.481	25	Gulf of Alaska	1	Herring	1	175.542
2018-06-24 14:00:00	7.481	23	Gulf of Alaska	1	Herring	1	175.583
2018-06-24 15:00:00	7.481	52	Gulf of Alaska	1	Herring	1	175.625
2018-06-24 16:00:00	7.481	35	Gulf of Alaska	1	Herring	1	175.667
2018-06-24 17:00:00	7.882	23	Gulf of Alaska	1	Herring	1	175.708
2018-06-24 18:00:00	8.082	29	Gulf of Alaska	1	Herring	1	175.75
2018-06-24 19:00:00	8.082	29	Gulf of Alaska	1	Herring	1	175.792
2018-06-24 20:00:00	7.983	14	Gulf of Alaska	1	Herring	1	175.833
2018-06-24 21:00:00	8.082	4	Gulf of Alaska	1	Herring	1	175.875
2018-06-24 22:00:00	8.082	0	Gulf of Alaska	1	Herring	1	175.917
2018-06-24 23:00:00	7.682	0	Gulf of Alaska	1	Herring	1	175.958
2018-06-25	7.682	0	Gulf of Alaska	1	Herring	1	176
2018-06-25 01:00:00	7.582	0	Gulf of Alaska	1	Herring	1	176.042
2018-06-25 02:00:00	7.582	0	Gulf of Alaska	1	Herring	1	176.083
2018-06-25 03:00:00	7.481	0	Gulf of Alaska	1	Herring	1	176.125
2018-06-25 04:00:00	7.481	0	Gulf of Alaska	1	Herring	1	176.167
2018-06-25 05:00:00	7.582	0	Gulf of Alaska	1	Herring	1	176.208
2018-06-25 06:00:00	7.782	0	Gulf of Alaska	1	Herring	1	176.25
2018-06-25 07:00:00	8.382	4	Gulf of Alaska	1	Herring	1	176.292
2018-06-25 08:00:00	8.182	11	Gulf of Alaska	1	Herring	1	176.333
2018-06-25 09:00:00	8.082	20	Gulf of Alaska	1	Herring	1	176.375
2018-06-25 10:00:00	8.282	22	Gulf of Alaska	1	Herring	1	176.417
2018-06-25 11:00:00	7.983	19	Gulf of Alaska	1	Herring	1	176.458
2018-06-25 12:00:00	7.882	12	Gulf of Alaska	1	Herring	1	176.5
2018-06-25 13:00:00	7.682	7	Gulf of Alaska	1	Herring	1	176.542
2018-06-25 14:00:00	7.582	15	Gulf of Alaska	1	Herring	1	176.583
2018-06-25 15:00:00	7.481	21	Gulf of Alaska	1	Herring	1	176.625
2018-06-25 16:00:00	7.582	21	Gulf of Alaska	1	Herring	1	176.667
2018-06-25 17:00:00	7.582	29	Gulf of Alaska	1	Herring	1	176.708
2018-06-25 18:00:00	7.983	15	Gulf of Alaska	1	Herring	1	176.75
2018-06-25 19:00:00	8.481	16	Gulf of Alaska	1	Herring	1	176.792
2018-06-25 20:00:00	8.082	12	Gulf of Alaska	1	Herring	1	176.833
2018-06-25 21:00:00	7.983	7	Gulf of Alaska	1	Herring	1	176.875
2018-06-25 22:00:00	7.983	1	Gulf of Alaska	1	Herring	1	176.917
2018-06-25 23:00:00	7.983	0	Gulf of Alaska	1	Herring	1	176.958
2018-06-26	7.882	0	Gulf of Alaska	1	Herring	1	177
2018-06-26 01:00:00	7.682	0	Gulf of Alaska	1	Herring	1	177.042
2018-06-26 02:00:00	7.582	0	Gulf of Alaska	1	Herring	1	177.083
2018-06-26 03:00:00	7.582	0	Gulf of Alaska	1	Herring	1	177.125
2018-06-26 04:00:00	7.481	0	Gulf of Alaska	1	Herring	1	177.167
2018-06-26 05:00:00	7.481	0	Gulf of Alaska	1	Herring	1	177.208
2018-06-26 06:00:00	7.582	0	Gulf of Alaska	1	Herring	1	177.25
2018-06-26 07:00:00	8.082	5	Gulf of Alaska	1	Herring	1	177.292
2018-06-26 08:00:00	8.082	1	Gulf of Alaska	1	Herring	1	177.333
2018-06-26 09:00:00	8.082	20	Gulf of Alaska	1	Herring	1	177.375
2018-06-26 10:00:00	8.082	31	Gulf of Alaska	1	Herring	1	177.417
2018-06-26 11:00:00	8.082	16	Gulf of Alaska	1	Herring	1	177.458
2018-06-26 12:00:00	7.983	12	Gulf of Alaska	1	Herring	1	177.5
2018-06-26 13:00:00	7.983	8	Gulf of Alaska	1	Herring	1	177.542
2018-06-26 14:00:00	7.782	5	Gulf of Alaska	1	Herring	1	177.583
2018-06-26 15:00:00	7.682	7	Gulf of Alaska	1	Herring	1	177.625
2018-06-26 16:00:00	7.582	9	Gulf of Alaska	1	Herring	1	177.667
2018-06-26 17:00:00	7.582	12	Gulf of Alaska	1	Herring	1	177.708
2018-06-26 18:00:00	7.682	12	Gulf of Alaska	1	Herring	1	177.75
2018-06-26 19:00:00	7.983	7	Gulf of Alaska	1	Herring	1	177.792
2018-06-26 20:00:00	7.983	10	Gulf of Alaska	1	Herring	1	177.833
2018-06-26 21:00:00	8.082	2	Gulf of Alaska	1	Herring	1	177.875
2018-06-26 22:00:00	8.082	0	Gulf of Alaska	1	Herring	1	177.917
2018-06-26 23:00:00	7.882	0	Gulf of Alaska	1	Herring	1	177.958
2018-06-27	7.882	0	Gulf of Alaska	1	Herring	1	178
2018-06-27 01:00:00	7.882	0	Gulf of Alaska	1	Herring	1	178.042
2018-06-27 02:00:00	7.983	0	Gulf of Alaska	1	Herring	1	178.083
2018-06-27 03:00:00	7.582	0	Gulf of Alaska	1	Herring	1	178.125
2018-06-27 04:00:00	7.682	0	Gulf of Alaska	1	Herring	1	178.167
2018-06-27 05:00:00	7.682	0	Gulf of Alaska	1	Herring	1	178.208
2018-06-27 06:00:00	7.682	0	Gulf of Alaska	1	Herring	1	178.25
2018-06-27 07:00:00	7.782	1	Gulf of Alaska	1	Herring	1	178.292
2018-06-27 08:00:00	7.882	5	Gulf of Alaska	1	Herring	1	178.333
2018-06-27 09:00:00	7.882	11	Gulf of Alaska	1	Herring	1	178.375
2018-06-27 10:00:00	7.983	11	Gulf of Alaska	1	Herring	1	178.417
2018-06-27 11:00:00	7.882	15	Gulf of Alaska	1	Herring	1	178.458
2018-06-27 12:00:00	7.983	16	Gulf of Alaska	1	Herring	1	178.5
2018-06-27 13:00:00	7.983	13	Gulf of Alaska	1	Herring	1	178.542
2018-06-27 14:00:00	7.983	7	Gulf of Alaska	1	Herring	1	178.583
2018-06-27 15:00:00	7.682	3	Gulf of Alaska	1	Herring	1	178.625
2018-06-27 16:00:00	7.582	4	Gulf of Alaska	1	Herring	1	178.667
2018-06-27 17:00:00	7.782	1	Gulf of Alaska	1	Herring	1	178.708
2018-06-27 18:00:00	7.782	0	Gulf of Alaska	1	Herring	1	178.75
2018-06-27 19:00:00	7.782	1	Gulf of Alaska	1	Herring	1	178.792
2018-06-27 20:00:00	7.782	0	Gulf of Alaska	1	Herring	1	178.833
2018-06-27 21:00:00	7.882	0	Gulf of Alaska	1	Herring	1	178.875
2018-06-27 22:00:00	7.782	0	Gulf of Alaska	1	Herring	1	178.917
2018-06-27 23:00:00	7.882	0	Gulf of Alaska	1	Herring	1	178.958
2018-06-28	7.882	0	Gulf of Alaska	1	Herring	1	179
2018-06-28 01:00:00	7.882	0	Gulf of Alaska	1	Herring	1	179.042
2018-06-28 02:00:00	7.882	0	Gulf of Alaska	1	Herring	1	179.083
2018-06-28 03:00:00	7.782	0	Gulf of Alaska	1	Herring	1	179.125
2018-06-28 04:00:00	7.682	0	Gulf of Alaska	1	Herring	1	179.167
2018-06-28 05:00:00	7.682	0	Gulf of Alaska	1	Herring	1	179.208
2018-06-28 06:00:00	7.682	0	Gulf of Alaska	1	Herring	1	179.25
2018-06-28 07:00:00	7.682	0	Gulf of Alaska	1	Herring	1	179.292
2018-06-28 08:00:00	7.782	0	Gulf of Alaska	1	Herring	1	179.333
2018-06-28 09:00:00	7.882	0	Gulf of Alaska	1	Herring	1	179.375
2018-06-28 10:00:00	7.882	3	Gulf of Alaska	1	Herring	1	179.417
2018-06-28 11:00:00	7.882	1	Gulf of Alaska	1	Herring	1	179.458
2018-06-28 12:00:00	7.882	0	Gulf of Alaska	1	Herring	1	179.5
2018-06-28 13:00:00	7.882	0	Gulf of Alaska	1	Herring	1	179.542
2018-06-28 14:00:00	7.782	0	Gulf of Alaska	1	Herring	1	179.583
2018-06-28 15:00:00	7.882	0	Gulf of Alaska	1	Herring	1	179.625
2018-06-28 16:00:00	7.682	0	Gulf of Alaska	1	Herring	1	179.667
2018-06-28 17:00:00	7.782	0	Gulf of Alaska	1	Herring	1	179.708
2018-06-28 18:00:00	7.782	0	Gulf of Alaska	1	Herring	1	179.75
2018-06-28 19:00:00	7.682	0	Gulf of Alaska	1	Herring	1	179.792
2018-06-28 20:00:00	7.782	0	Gulf of Alaska	1	Herring	1	179.833
2018-06-28 21:00:00	7.882	0	Gulf of Alaska	1	Herring	1	179.875
2018-06-28 22:00:00	7.782	0	Gulf of Alaska	1	Herring	1	179.917
2018-06-28 23:00:00	7.882	0	Gulf of Alaska	1	Herring	1	179.958
2018-06-29	7.882	0	Gulf of Alaska	1	Herring	1	180
2018-06-29 01:00:00	7.882	0	Gulf of Alaska	1	Herring	1	180.042
2018-06-29 02:00:00	7.882	0	Gulf of Alaska	1	Herring	1	180.083
2018-06-29 03:00:00	7.882	0	Gulf of Alaska	1	Herring	1	180.125
2018-06-29 04:00:00	7.782	0	Gulf of Alaska	1	Herring	1	180.167
2018-06-29 05:00:00	7.682	0	Gulf of Alaska	1	Herring	1	180.208
2018-06-29 06:00:00	7.682	0	Gulf of Alaska	1	Herring	1	180.25
2018-06-29 07:00:00	7.782	0	Gulf of Alaska	1	Herring	1	180.292
2018-06-29 08:00:00	7.782	0	Gulf of Alaska	1	Herring	1	180.333
2018-06-29 09:00:00	7.882	0	Gulf of Alaska	1	Herring	1	180.375
2018-06-29 10:00:00	7.983	1	Gulf of Alaska	1	Herring	1	180.417
2018-06-29 11:00:00	7.983	1	Gulf of Alaska	1	Herring	1	180.458
2018-06-29 12:00:00	7.983	1	Gulf of Alaska	1	Herring	1	180.5
2018-06-29 13:00:00	7.983	1	Gulf of Alaska	1	Herring	1	180.542
2018-06-29 14:00:00	8.082	0	Gulf of Alaska	1	Herring	1	180.583
2018-06-29 15:00:00	8.082	0	Gulf of Alaska	1	Herring	1	180.625
2018-06-29 16:00:00	7.782	0	Gulf of Alaska	1	Herring	1	180.667
2018-06-29 17:00:00	7.782	0	Gulf of Alaska	1	Herring	1	180.708
2018-06-29 18:00:00	7.782	0	Gulf of Alaska	1	Herring	1	180.75
2018-06-29 19:00:00	7.782	0	Gulf of Alaska	1	Herring	1	180.792
2018-06-29 20:00:00	7.782	0	Gulf of Alaska	1	Herring	1	180.833
2018-06-29 21:00:00	7.983	0	Gulf of Alaska	1	Herring	1	180.875
2018-06-29 22:00:00	8.182	0	Gulf of Alaska	1	Herring	1	180.917
2018-06-29 23:00:00	8.182	0	Gulf of Alaska	1	Herring	1	180.958
2018-06-30	8.182	0	Gulf of Alaska	1	Herring	1	181
2018-06-30 01:00:00	8.382	0	Gulf of Alaska	1	Herring	1	181.042
2018-06-30 02:00:00	8.282	0	Gulf of Alaska	1	Herring	1	181.083
2018-06-30 03:00:00	8.182	0	Gulf of Alaska	1	Herring	1	181.125
2018-06-30 04:00:00	8.182	0	Gulf of Alaska	1	Herring	1	181.167
2018-06-30 05:00:00	7.882	0	Gulf of Alaska	1	Herring	1	181.208
2018-06-30 06:00:00	7.882	0	Gulf of Alaska	1	Herring	1	181.25
2018-06-30 07:00:00	7.882	0	Gulf of Alaska	1	Herring	1	181.292
2018-06-30 08:00:00	7.882	0	Gulf of Alaska	1	Herring	1	181.333
2018-06-30 09:00:00	8.082	1	Gulf of Alaska	1	Herring	1	181.375
2018-06-30 10:00:00	8.382	16	Gulf of Alaska	1	Herring	1	181.417
2018-06-30 11:00:00	8.779	20	Gulf of Alaska	1	Herring	1	181.458
2018-06-30 12:00:00	8.879	16	Gulf of Alaska	1	Herring	1	181.5
2018-06-30 13:00:00	8.481	8	Gulf of Alaska	1	Herring	1	181.542
2018-06-30 14:00:00	8.282	4	Gulf of Alaska	1	Herring	1	181.583
2018-06-30 15:00:00	8.282	2	Gulf of Alaska	1	Herring	1	181.625
2018-06-30 16:00:00	8.282	0	Gulf of Alaska	1	Herring	1	181.667
2018-06-30 17:00:00	7.983	0	Gulf of Alaska	1	Herring	1	181.708
2018-06-30 18:00:00	7.983	0	Gulf of Alaska	1	Herring	1	181.75
2018-06-30 19:00:00	8.082	0	Gulf of Alaska	1	Herring	1	181.792
2018-06-30 20:00:00	7.983	0	Gulf of Alaska	1	Herring	1	181.833
2018-06-30 21:00:00	8.082	0	Gulf of Alaska	1	Herring	1	181.875
2018-06-30 22:00:00	8.481	0	Gulf of Alaska	1	Herring	1	181.917
2018-06-30 23:00:00	8.581	0	Gulf of Alaska	1	Herring	1	181.958
2018-07-01	8.68	0	Gulf of Alaska	1	Herring	1	182
2018-07-01 01:00:00	8.382	0	Gulf of Alaska	1	Herring	1	182.042
2018-07-01 02:00:00	8.581	0	Gulf of Alaska	1	Herring	1	182.083
2018-07-01 03:00:00	8.481	0	Gulf of Alaska	1	Herring	1	182.125
2018-07-01 04:00:00	8.481	0	Gulf of Alaska	1	Herring	1	182.167
2018-07-01 05:00:00	8.082	0	Gulf of Alaska	1	Herring	1	182.208
2018-07-01 06:00:00	8.082	0	Gulf of Alaska	1	Herring	1	182.25
2018-07-01 07:00:00	7.983	0	Gulf of Alaska	1	Herring	1	182.292
2018-07-01 08:00:00	8.082	0	Gulf of Alaska	1	Herring	1	182.333
2018-07-01 09:00:00	8.182	0	Gulf of Alaska	1	Herring	1	182.375
2018-07-01 10:00:00	8.68	8	Gulf of Alaska	1	Herring	1	182.417
2018-07-01 11:00:00	8.978	12	Gulf of Alaska	1	Herring	1	182.458
2018-07-01 12:00:00	8.879	11	Gulf of Alaska	1	Herring	1	182.5
2018-07-01 13:00:00	8.779	9	Gulf of Alaska	1	Herring	1	182.542
2018-07-01 14:00:00	8.879	4	Gulf of Alaska	1	Herring	1	182.583
2018-07-01 15:00:00	8.779	4	Gulf of Alaska	1	Herring	1	182.625
2018-07-01 16:00:00	8.68	1	Gulf of Alaska	1	Herring	1	182.667
2018-07-01 17:00:00	8.68	0	Gulf of Alaska	1	Herring	1	182.708
2018-07-01 18:00:00	8.779	0	Gulf of Alaska	1	Herring	1	182.75
2018-07-01 19:00:00	8.382	0	Gulf of Alaska	1	Herring	1	182.792
2018-07-01 20:00:00	8.282	0	Gulf of Alaska	1	Herring	1	182.833
2018-07-01 21:00:00	8.382	0	Gulf of Alaska	1	Herring	1	182.875
2018-07-01 22:00:00	8.779	0	Gulf of Alaska	1	Herring	1	182.917
2018-07-01 23:00:00	9.176	0	Gulf of Alaska	1	Herring	1	182.958
2018-07-02	9.176	0	Gulf of Alaska	1	Herring	1	183
2018-07-02 01:00:00	8.779	0	Gulf of Alaska	1	Herring	1	183.042
2018-07-02 02:00:00	9.373	0	Gulf of Alaska	1	Herring	1	183.083
2018-07-02 03:00:00	8.779	0	Gulf of Alaska	1	Herring	1	183.125
2018-07-02 04:00:00	8.779	0	Gulf of Alaska	1	Herring	1	183.167
2018-07-02 05:00:00	8.779	0	Gulf of Alaska	1	Herring	1	183.208
2018-07-02 06:00:00	8.382	0	Gulf of Alaska	1	Herring	1	183.25
2018-07-02 07:00:00	8.581	0	Gulf of Alaska	1	Herring	1	183.292
2018-07-02 08:00:00	8.68	0	Gulf of Alaska	1	Herring	1	183.333
2018-07-02 09:00:00	8.581	0	Gulf of Alaska	1	Herring	1	183.375
2018-07-02 10:00:00	8.779	1	Gulf of Alaska	1	Herring	1	183.417
2018-07-02 11:00:00	9.373	10	Gulf of Alaska	1	Herring	1	183.458
2018-07-02 12:00:00	9.275	13	Gulf of Alaska	1	Herring	1	183.5
2018-07-02 13:00:00	9.275	11	Gulf of Alaska	1	Herring	1	183.542
2018-07-02 14:00:00	9.472	7	Gulf of Alaska	1	Herring	1	183.583
2018-07-02 15:00:00	9.472	3	Gulf of Alaska	1	Herring	1	183.625
2018-07-02 16:00:00	9.176	2	Gulf of Alaska	1	Herring	1	183.667
2018-07-02 17:00:00	9.176	1	Gulf of Alaska	1	Herring	1	183.708
2018-07-02 18:00:00	8.779	0	Gulf of Alaska	1	Herring	1	183.75
2018-07-02 19:00:00	8.581	0	Gulf of Alaska	1	Herring	1	183.792
2018-07-02 20:00:00	8.68	0	Gulf of Alaska	1	Herring	1	183.833
2018-07-02 21:00:00	8.581	0	Gulf of Alaska	1	Herring	1	183.875
2018-07-02 22:00:00	8.68	0	Gulf of Alaska	1	Herring	1	183.917
2018-07-02 23:00:00	9.275	0	Gulf of Alaska	1	Herring	1	183.958
2018-07-03	9.275	0	Gulf of Alaska	1	Herring	1	184
2018-07-03 01:00:00	9.176	0	Gulf of Alaska	1	Herring	1	184.042
2018-07-03 02:00:00	9.077	0	Gulf of Alaska	1	Herring	1	184.083
2018-07-03 03:00:00	9.669	0	Gulf of Alaska	1	Herring	1	184.125
2018-07-03 04:00:00	9.077	0	Gulf of Alaska	1	Herring	1	184.167
2018-07-03 05:00:00	8.978	0	Gulf of Alaska	1	Herring	1	184.208
2018-07-03 06:00:00	8.779	0	Gulf of Alaska	1	Herring	1	184.25
2018-07-03 07:00:00	8.581	0	Gulf of Alaska	1	Herring	1	184.292
2018-07-03 08:00:00	8.68	0	Gulf of Alaska	1	Herring	1	184.333
2018-07-03 09:00:00	8.978	0	Gulf of Alaska	1	Herring	1	184.375
2018-07-03 10:00:00	8.879	3	Gulf of Alaska	1	Herring	1	184.417
2018-07-03 11:00:00	9.275	7	Gulf of Alaska	1	Herring	1	184.458
2018-07-03 12:00:00	9.768	13	Gulf of Alaska	1	Herring	1	184.5
2018-07-03 13:00:00	9.768	12	Gulf of Alaska	1	Herring	1	184.542
2018-07-03 14:00:00	10.455	7	Gulf of Alaska	1	Herring	1	184.583
2018-07-03 15:00:00	9.866	5	Gulf of Alaska	1	Herring	1	184.625
2018-07-03 16:00:00	9.373	2	Gulf of Alaska	1	Herring	1	184.667
2018-07-03 17:00:00	9.373	0	Gulf of Alaska	1	Herring	1	184.708
2018-07-03 18:00:00	9.176	0	Gulf of Alaska	1	Herring	1	184.75
2018-07-03 19:00:00	8.879	0	Gulf of Alaska	1	Herring	1	184.792
2018-07-03 20:00:00	8.879	0	Gulf of Alaska	1	Herring	1	184.833
2018-07-03 21:00:00	8.879	0	Gulf of Alaska	1	Herring	1	184.875
2018-07-03 22:00:00	8.779	0	Gulf of Alaska	1	Herring	1	184.917
2018-07-03 23:00:00	9.472	0	Gulf of Alaska	1	Herring	1	184.958
2018-07-04	9.669	0	Gulf of Alaska	1	Herring	1	185
2018-07-04 01:00:00	9.965	0	Gulf of Alaska	1	Herring	1	185.042
2018-07-04 02:00:00	9.768	0	Gulf of Alaska	1	Herring	1	185.083
2018-07-04 03:00:00	10.259	0	Gulf of Alaska	1	Herring	1	185.125
2018-07-04 04:00:00	9.866	0	Gulf of Alaska	1	Herring	1	185.167
2018-07-04 05:00:00	9.373	0	Gulf of Alaska	1	Herring	1	185.208
2018-07-04 06:00:00	9.275	0	Gulf of Alaska	1	Herring	1	185.25
2018-07-04 07:00:00	9.077	0	Gulf of Alaska	1	Herring	1	185.292
2018-07-04 08:00:00	8.879	0	Gulf of Alaska	1	Herring	1	185.333
2018-07-04 09:00:00	9.077	0	Gulf of Alaska	1	Herring	1	185.375
2018-07-04 10:00:00	9.275	0	Gulf of Alaska	1	Herring	1	185.417
2018-07-04 11:00:00	9.176	2	Gulf of Alaska	1	Herring	1	185.458
2018-07-04 12:00:00	10.161	2	Gulf of Alaska	1	Herring	1	185.5
2018-07-04 13:00:00	10.357	41	Gulf of Alaska	1	Herring	1	185.542
2018-07-04 14:00:00	10.455	5	Gulf of Alaska	1	Herring	1	185.583
2018-07-04 15:00:00	10.161	6	Gulf of Alaska	1	Herring	1	185.625
2018-07-04 16:00:00	10.161	1	Gulf of Alaska	1	Herring	1	185.667
2018-07-04 17:00:00	9.669	1	Gulf of Alaska	1	Herring	1	185.708
2018-07-04 18:00:00	9.472	1	Gulf of Alaska	1	Herring	1	185.75
2018-07-04 19:00:00	9.669	0	Gulf of Alaska	1	Herring	1	185.792
2018-07-04 20:00:00	9.275	0	Gulf of Alaska	1	Herring	1	185.833
2018-07-04 21:00:00	9.077	0	Gulf of Alaska	1	Herring	1	185.875
2018-07-04 22:00:00	8.978	0	Gulf of Alaska	1	Herring	1	185.917
2018-07-04 23:00:00	9.275	0	Gulf of Alaska	1	Herring	1	185.958
2018-07-05	10.161	0	Gulf of Alaska	1	Herring	1	186
2018-07-05 01:00:00	10.455	0	Gulf of Alaska	1	Herring	1	186.042
2018-07-05 02:00:00	11.528	0	Gulf of Alaska	1	Herring	1	186.083
2018-07-05 03:00:00	10.651	0	Gulf of Alaska	1	Herring	1	186.125
2018-07-05 04:00:00	10.161	0	Gulf of Alaska	1	Herring	1	186.167
2018-07-05 05:00:00	10.357	0	Gulf of Alaska	1	Herring	1	186.208
2018-07-05 06:00:00	10.161	0	Gulf of Alaska	1	Herring	1	186.25
2018-07-05 07:00:00	10.748	0	Gulf of Alaska	1	Herring	1	186.292
2018-07-05 08:00:00	9.669	0	Gulf of Alaska	1	Herring	1	186.333
2018-07-05 09:00:00	9.571	4	Gulf of Alaska	1	Herring	1	186.375
2018-07-05 10:00:00	9.866	0	Gulf of Alaska	1	Herring	1	186.417
2018-07-05 11:00:00	10.259	4	Gulf of Alaska	1	Herring	1	186.458
2018-07-05 12:00:00	11.041	45	Gulf of Alaska	1	Herring	1	186.5
2018-07-05 13:00:00	11.625	112	Gulf of Alaska	1	Herring	1	186.542
2018-07-05 14:00:00	11.722	160	Gulf of Alaska	1	Herring	1	186.583
2018-07-05 15:00:00	12.11	47	Gulf of Alaska	1	Herring	1	186.625
2018-07-05 16:00:00	11.431	34	Gulf of Alaska	1	Herring	1	186.667
2018-07-05 17:00:00	11.236	20	Gulf of Alaska	1	Herring	1	186.708
2018-07-05 18:00:00	11.334	8	Gulf of Alaska	1	Herring	1	186.75
2018-07-05 19:00:00	11.236	4	Gulf of Alaska	1	Herring	1	186.792
2018-07-05 20:00:00	11.041	2	Gulf of Alaska	1	Herring	1	186.833
2018-07-05 21:00:00	11.041	0	Gulf of Alaska	1	Herring	1	186.875
2018-07-05 22:00:00	10.161	0	Gulf of Alaska	1	Herring	1	186.917
2018-07-05 23:00:00	10.161	0	Gulf of Alaska	1	Herring	1	186.958
2018-07-06	10.161	0	Gulf of Alaska	1	Herring	1	187
2018-07-06 01:00:00	10.748	0	Gulf of Alaska	1	Herring	1	187.042
2018-07-06 02:00:00	11.334	0	Gulf of Alaska	1	Herring	1	187.083
2018-07-06 03:00:00	11.139	0	Gulf of Alaska	1	Herring	1	187.125
2018-07-06 04:00:00	10.944	0	Gulf of Alaska	1	Herring	1	187.167
2018-07-06 05:00:00	11.431	0	Gulf of Alaska	1	Herring	1	187.208
2018-07-06 06:00:00	11.236	0	Gulf of Alaska	1	Herring	1	187.25
2018-07-06 07:00:00	11.041	0	Gulf of Alaska	1	Herring	1	187.292
2018-07-06 08:00:00	10.259	0	Gulf of Alaska	1	Herring	1	187.333
2018-07-06 09:00:00	9.866	1	Gulf of Alaska	1	Herring	1	187.375
2018-07-06 10:00:00	9.571	2	Gulf of Alaska	1	Herring	1	187.417
2018-07-06 11:00:00	9.571	6	Gulf of Alaska	1	Herring	1	187.458
2018-07-06 12:00:00	9.768	24	Gulf of Alaska	1	Herring	1	187.5
2018-07-06 13:00:00	10.455	89	Gulf of Alaska	1	Herring	1	187.542
2018-07-06 14:00:00	10.944	48	Gulf of Alaska	1	Herring	1	187.583
2018-07-06 15:00:00	11.722	36	Gulf of Alaska	1	Herring	1	187.625
2018-07-06 16:00:00	11.236	17	Gulf of Alaska	1	Herring	1	187.667
2018-07-06 17:00:00	11.139	13	Gulf of Alaska	1	Herring	1	187.708
2018-07-06 18:00:00	10.357	7	Gulf of Alaska	1	Herring	1	187.75
2018-07-06 19:00:00	10.455	4	Gulf of Alaska	1	Herring	1	187.792
2018-07-06 20:00:00	9.965	2	Gulf of Alaska	1	Herring	1	187.833
2018-07-06 21:00:00	9.669	0	Gulf of Alaska	1	Herring	1	187.875
2018-07-06 22:00:00	9.472	0	Gulf of Alaska	1	Herring	1	187.917
2018-07-06 23:00:00	9.373	0	Gulf of Alaska	1	Herring	1	187.958
2018-07-07	9.472	0	Gulf of Alaska	1	Herring	1	188
2018-07-07 01:00:00	9.866	0	Gulf of Alaska	1	Herring	1	188.042
2018-07-07 02:00:00	10.259	0	Gulf of Alaska	1	Herring	1	188.083
2018-07-07 03:00:00	10.748	0	Gulf of Alaska	1	Herring	1	188.125
2018-07-07 04:00:00	12.11	0	Gulf of Alaska	1	Herring	1	188.167
2018-07-07 05:00:00	12.594	0	Gulf of Alaska	1	Herring	1	188.208
2018-07-07 06:00:00	11.431	0	Gulf of Alaska	1	Herring	1	188.25
2018-07-07 07:00:00	11.139	1	Gulf of Alaska	1	Herring	1	188.292
2018-07-07 08:00:00	10.944	2	Gulf of Alaska	1	Herring	1	188.333
2018-07-07 09:00:00	10.651	4	Gulf of Alaska	1	Herring	1	188.375
2018-07-07 10:00:00	9.866	6	Gulf of Alaska	1	Herring	1	188.417
2018-07-07 11:00:00	9.571	18	Gulf of Alaska	1	Herring	1	188.458
2018-07-07 12:00:00	9.472	24	Gulf of Alaska	1	Herring	1	188.5
2018-07-07 13:00:00	10.161	67	Gulf of Alaska	1	Herring	1	188.542
2018-07-07 14:00:00	10.748	11	Gulf of Alaska	1	Herring	1	188.583
2018-07-07 15:00:00	11.236	14	Gulf of Alaska	1	Herring	1	188.625
2018-07-07 16:00:00	11.431	14	Gulf of Alaska	1	Herring	1	188.667
2018-07-07 17:00:00	11.236	25	Gulf of Alaska	1	Herring	1	188.708
2018-07-07 18:00:00	10.651	15	Gulf of Alaska	1	Herring	1	188.75
2018-07-07 19:00:00	10.063	5	Gulf of Alaska	1	Herring	1	188.792
2018-07-07 20:00:00	9.571	4	Gulf of Alaska	1	Herring	1	188.833
2018-07-07 21:00:00	9.768	0	Gulf of Alaska	1	Herring	1	188.875
2018-07-07 22:00:00	9.669	0	Gulf of Alaska	1	Herring	1	188.917
2018-07-07 23:00:00	9.373	0	Gulf of Alaska	1	Herring	1	188.958
2018-07-08	9.373	0	Gulf of Alaska	1	Herring	1	189
2018-07-08 01:00:00	9.077	0	Gulf of Alaska	1	Herring	1	189.042
2018-07-08 02:00:00	9.176	0	Gulf of Alaska	1	Herring	1	189.083
2018-07-08 03:00:00	9.571	0	Gulf of Alaska	1	Herring	1	189.125
2018-07-08 04:00:00	9.965	0	Gulf of Alaska	1	Herring	1	189.167
2018-07-08 05:00:00	9.472	0	Gulf of Alaska	1	Herring	1	189.208
2018-07-08 06:00:00	9.373	0	Gulf of Alaska	1	Herring	1	189.25
2018-07-08 07:00:00	9.669	0	Gulf of Alaska	1	Herring	1	189.292
2018-07-08 08:00:00	9.176	1	Gulf of Alaska	1	Herring	1	189.333
2018-07-08 09:00:00	9.077	0	Gulf of Alaska	1	Herring	1	189.375
2018-07-08 10:00:00	9.176	0	Gulf of Alaska	1	Herring	1	189.417
2018-07-08 11:00:00	8.978	0	Gulf of Alaska	1	Herring	1	189.458
2018-07-08 12:00:00	8.879	0	Gulf of Alaska	1	Herring	1	189.5
2018-07-08 13:00:00	8.779	0	Gulf of Alaska	1	Herring	1	189.542
2018-07-08 14:00:00	9.077	0	Gulf of Alaska	1	Herring	1	189.583
2018-07-08 15:00:00	9.373	4	Gulf of Alaska	1	Herring	1	189.625
2018-07-08 16:00:00	9.373	4	Gulf of Alaska	1	Herring	1	189.667
2018-07-08 17:00:00	9.373	3	Gulf of Alaska	1	Herring	1	189.708
2018-07-08 18:00:00	9.373	7	Gulf of Alaska	1	Herring	1	189.75
2018-07-08 19:00:00	9.176	11	Gulf of Alaska	1	Herring	1	189.792
2018-07-08 20:00:00	9.176	5	Gulf of Alaska	1	Herring	1	189.833
2018-07-08 21:00:00	9.275	2	Gulf of Alaska	1	Herring	1	189.875
2018-07-08 22:00:00	8.978	0	Gulf of Alaska	1	Herring	1	189.917
2018-07-08 23:00:00	9.176	0	Gulf of Alaska	1	Herring	1	189.958
2018-08-30 23:00:00	13.654	53.8	Scotland	1	Danger Reef	2	242.958
2018-08-31	13.654	43.1	Scotland	1	Danger Reef	2	243
2018-08-31 01:00:00	13.75	10.8	Scotland	1	Danger Reef	2	243.042
2018-08-31 02:00:00	13.75	0	Scotland	1	Danger Reef	2	243.083
2018-08-31 03:00:00	13.75	0	Scotland	1	Danger Reef	2	243.125
2018-08-31 04:00:00	13.654	0	Scotland	1	Danger Reef	2	243.167
2018-08-31 05:00:00	13.654	0	Scotland	1	Danger Reef	2	243.208
2018-08-31 06:00:00	13.654	0	Scotland	1	Danger Reef	2	243.25
2018-08-31 07:00:00	13.654	0	Scotland	1	Danger Reef	2	243.292
2018-08-31 08:00:00	13.654	0	Scotland	1	Danger Reef	2	243.333
2018-08-31 09:00:00	13.654	0	Scotland	1	Danger Reef	2	243.375
2018-08-31 10:00:00	13.654	0	Scotland	1	Danger Reef	2	243.417
2018-08-31 11:00:00	13.654	0	Scotland	1	Danger Reef	2	243.458
2018-08-31 12:00:00	13.654	0	Scotland	1	Danger Reef	2	243.5
2018-08-31 13:00:00	13.654	0	Scotland	1	Danger Reef	2	243.542
2018-08-31 14:00:00	13.654	0	Scotland	1	Danger Reef	2	243.583
2018-08-31 15:00:00	13.654	64.6	Scotland	1	Danger Reef	2	243.625
2018-08-31 16:00:00	13.654	183	Scotland	1	Danger Reef	2	243.667
2018-08-31 17:00:00	13.75	269.1	Scotland	1	Danger Reef	2	243.708
2018-08-31 18:00:00	13.75	301.4	Scotland	1	Danger Reef	2	243.75
2018-08-31 19:00:00	13.654	322.9	Scotland	1	Danger Reef	2	243.792
2018-08-31 20:00:00	13.654	355.2	Scotland	1	Danger Reef	2	243.833
2018-08-31 21:00:00	13.654	258.3	Scotland	1	Danger Reef	2	243.875
2018-08-31 22:00:00	13.654	107.6	Scotland	1	Danger Reef	2	243.917
2018-08-31 23:00:00	13.75	43.1	Scotland	1	Danger Reef	2	243.958
2018-09-13	13.942	0	Scotland	1	Danger Reef	2	256
2018-09-13 01:00:00	13.942	0	Scotland	1	Danger Reef	2	256.042
2018-09-13 02:00:00	13.942	0	Scotland	1	Danger Reef	2	256.083
2018-09-13 03:00:00	13.942	0	Scotland	1	Danger Reef	2	256.125
2018-09-13 04:00:00	13.846	0	Scotland	1	Danger Reef	2	256.167
2018-09-13 05:00:00	13.846	0	Scotland	1	Danger Reef	2	256.208
2018-09-13 06:00:00	13.846	0	Scotland	1	Danger Reef	2	256.25
2018-09-13 07:00:00	13.846	0	Scotland	1	Danger Reef	2	256.292
2018-09-13 08:00:00	13.846	0	Scotland	1	Danger Reef	2	256.333
2018-09-13 09:00:00	13.846	0	Scotland	1	Danger Reef	2	256.375
2018-09-13 10:00:00	13.846	0	Scotland	1	Danger Reef	2	256.417
2018-09-13 11:00:00	13.846	0	Scotland	1	Danger Reef	2	256.458
2018-09-13 12:00:00	13.846	0	Scotland	1	Danger Reef	2	256.5
2018-09-13 13:00:00	13.75	0	Scotland	1	Danger Reef	2	256.542
2018-09-13 14:00:00	13.75	0	Scotland	1	Danger Reef	2	256.583
2018-09-13 15:00:00	13.75	0	Scotland	1	Danger Reef	2	256.625
2018-09-13 16:00:00	13.846	21.5	Scotland	1	Danger Reef	2	256.667
2018-09-13 17:00:00	13.846	10.8	Scotland	1	Danger Reef	2	256.708
2018-09-13 18:00:00	13.846	10.8	Scotland	1	Danger Reef	2	256.75
2018-09-13 19:00:00	13.846	10.8	Scotland	1	Danger Reef	2	256.792
2018-09-13 20:00:00	13.75	10.8	Scotland	1	Danger Reef	2	256.833
2018-09-13 21:00:00	13.75	43.1	Scotland	1	Danger Reef	2	256.875
2018-09-13 22:00:00	13.846	43.1	Scotland	1	Danger Reef	2	256.917
2018-09-13 23:00:00	13.846	0	Scotland	1	Danger Reef	2	256.958
2018-09-14	13.846	0	Scotland	1	Danger Reef	2	257
2018-09-14 01:00:00	13.846	0	Scotland	1	Danger Reef	2	257.042
2018-09-14 02:00:00	13.846	0	Scotland	1	Danger Reef	2	257.083
2018-09-14 03:00:00	13.846	0	Scotland	1	Danger Reef	2	257.125
2018-09-14 04:00:00	13.846	0	Scotland	1	Danger Reef	2	257.167
2018-09-14 05:00:00	13.846	0	Scotland	1	Danger Reef	2	257.208
2018-09-14 06:00:00	13.846	0	Scotland	1	Danger Reef	2	257.25
2018-09-14 07:00:00	13.846	0	Scotland	1	Danger Reef	2	257.292
2018-09-14 08:00:00	13.846	0	Scotland	1	Danger Reef	2	257.333
2018-09-14 09:00:00	13.846	0	Scotland	1	Danger Reef	2	257.375
2018-09-14 10:00:00	13.846	0	Scotland	1	Danger Reef	2	257.417
2018-09-14 11:00:00	13.75	0	Scotland	1	Danger Reef	2	257.458
2018-09-14 12:00:00	13.846	0	Scotland	1	Danger Reef	2	257.5
2018-09-14 13:00:00	13.75	0	Scotland	1	Danger Reef	2	257.542
2018-09-14 14:00:00	13.75	0	Scotland	1	Danger Reef	2	257.583
2018-09-14 15:00:00	13.846	0	Scotland	1	Danger Reef	2	257.625
2018-09-14 16:00:00	13.846	10.8	Scotland	1	Danger Reef	2	257.667
2018-09-14 17:00:00	13.846	21.5	Scotland	1	Danger Reef	2	257.708
2018-09-14 18:00:00	13.846	21.5	Scotland	1	Danger Reef	2	257.75
2018-09-14 19:00:00	13.846	32.3	Scotland	1	Danger Reef	2	257.792
2018-09-14 20:00:00	13.846	0	Scotland	1	Danger Reef	2	257.833
2018-09-14 21:00:00	13.846	32.3	Scotland	1	Danger Reef	2	257.875
2018-09-14 22:00:00	13.846	21.5	Scotland	1	Danger Reef	2	257.917
2018-09-14 23:00:00	13.846	21.5	Scotland	1	Danger Reef	2	257.958
2018-09-15	13.846	10.8	Scotland	1	Danger Reef	2	258
2018-09-15 01:00:00	13.846	0	Scotland	1	Danger Reef	2	258.042
2018-09-15 02:00:00	13.846	0	Scotland	1	Danger Reef	2	258.083
2018-09-15 03:00:00	13.846	0	Scotland	1	Danger Reef	2	258.125
2018-09-15 04:00:00	13.846	0	Scotland	1	Danger Reef	2	258.167
2018-09-15 05:00:00	13.846	0	Scotland	1	Danger Reef	2	258.208
2018-09-15 06:00:00	13.846	0	Scotland	1	Danger Reef	2	258.25
2018-09-15 07:00:00	13.846	0	Scotland	1	Danger Reef	2	258.292
2018-09-15 08:00:00	13.846	0	Scotland	1	Danger Reef	2	258.333
2018-09-15 09:00:00	13.846	0	Scotland	1	Danger Reef	2	258.375
2018-09-15 10:00:00	13.846	0	Scotland	1	Danger Reef	2	258.417
2018-09-15 11:00:00	13.846	0	Scotland	1	Danger Reef	2	258.458
2018-09-15 12:00:00	13.846	0	Scotland	1	Danger Reef	2	258.5
2018-09-15 13:00:00	13.846	0	Scotland	1	Danger Reef	2	258.542
2018-09-15 14:00:00	13.846	0	Scotland	1	Danger Reef	2	258.583
2018-09-15 15:00:00	13.846	10.8	Scotland	1	Danger Reef	2	258.625
2018-09-15 16:00:00	13.846	10.8	Scotland	1	Danger Reef	2	258.667
2018-09-15 17:00:00	13.846	10.8	Scotland	1	Danger Reef	2	258.708
2018-09-15 18:00:00	13.846	75.3	Scotland	1	Danger Reef	2	258.75
2018-09-15 19:00:00	13.846	53.8	Scotland	1	Danger Reef	2	258.792
2018-09-15 20:00:00	13.846	10.8	Scotland	1	Danger Reef	2	258.833
2018-09-15 21:00:00	13.846	53.8	Scotland	1	Danger Reef	2	258.875
2018-09-15 22:00:00	13.846	75.3	Scotland	1	Danger Reef	2	258.917
2018-09-15 23:00:00	13.846	21.5	Scotland	1	Danger Reef	2	258.958
2018-09-16	13.846	10.8	Scotland	1	Danger Reef	2	259
2018-09-16 01:00:00	13.846	0	Scotland	1	Danger Reef	2	259.042
2018-09-16 02:00:00	13.846	0	Scotland	1	Danger Reef	2	259.083
2018-09-16 03:00:00	13.846	0	Scotland	1	Danger Reef	2	259.125
2018-09-16 04:00:00	13.846	0	Scotland	1	Danger Reef	2	259.167
2018-09-16 05:00:00	13.846	0	Scotland	1	Danger Reef	2	259.208
2018-09-16 06:00:00	13.846	0	Scotland	1	Danger Reef	2	259.25
2018-09-16 07:00:00	13.846	0	Scotland	1	Danger Reef	2	259.292
2018-09-16 08:00:00	13.846	0	Scotland	1	Danger Reef	2	259.333
2018-09-16 09:00:00	13.846	0	Scotland	1	Danger Reef	2	259.375
2018-09-16 10:00:00	13.846	0	Scotland	1	Danger Reef	2	259.417
2018-09-16 11:00:00	13.846	0	Scotland	1	Danger Reef	2	259.458
2018-09-16 12:00:00	13.846	0	Scotland	1	Danger Reef	2	259.5
2018-09-16 13:00:00	13.846	0	Scotland	1	Danger Reef	2	259.542
2018-09-16 14:00:00	13.846	0	Scotland	1	Danger Reef	2	259.583
2018-09-16 15:00:00	13.75	0	Scotland	1	Danger Reef	2	259.625
2018-09-16 16:00:00	13.846	0	Scotland	1	Danger Reef	2	259.667
2018-09-16 17:00:00	13.846	10.8	Scotland	1	Danger Reef	2	259.708
2018-09-16 18:00:00	13.846	21.5	Scotland	1	Danger Reef	2	259.75
2018-09-16 19:00:00	13.846	32.3	Scotland	1	Danger Reef	2	259.792
2018-09-16 20:00:00	13.846	43.1	Scotland	1	Danger Reef	2	259.833
2018-09-16 21:00:00	13.846	21.5	Scotland	1	Danger Reef	2	259.875
2018-09-16 22:00:00	13.75	43.1	Scotland	1	Danger Reef	2	259.917
2018-09-16 23:00:00	13.75	32.3	Scotland	1	Danger Reef	2	259.958
2018-09-17	13.75	0	Scotland	1	Danger Reef	2	260
2018-09-17 01:00:00	13.846	0	Scotland	1	Danger Reef	2	260.042
2018-09-17 02:00:00	13.846	0	Scotland	1	Danger Reef	2	260.083
2018-09-17 03:00:00	13.75	0	Scotland	1	Danger Reef	2	260.125
2018-09-17 04:00:00	13.846	0	Scotland	1	Danger Reef	2	260.167
2018-09-17 05:00:00	13.846	0	Scotland	1	Danger Reef	2	260.208
2018-09-17 06:00:00	13.846	0	Scotland	1	Danger Reef	2	260.25
2018-09-17 07:00:00	13.846	0	Scotland	1	Danger Reef	2	260.292
2018-09-17 08:00:00	13.846	0	Scotland	1	Danger Reef	2	260.333
2018-09-17 09:00:00	13.846	0	Scotland	1	Danger Reef	2	260.375
2018-09-17 10:00:00	13.75	0	Scotland	1	Danger Reef	2	260.417
2018-09-17 11:00:00	13.846	0	Scotland	1	Danger Reef	2	260.458
2018-09-17 12:00:00	13.75	0	Scotland	1	Danger Reef	2	260.5
2018-09-17 13:00:00	13.75	0	Scotland	1	Danger Reef	2	260.542
2018-09-17 14:00:00	13.75	0	Scotland	1	Danger Reef	2	260.583
2018-09-17 15:00:00	13.75	0	Scotland	1	Danger Reef	2	260.625
2018-09-17 16:00:00	13.846	0	Scotland	1	Danger Reef	2	260.667
2018-09-17 17:00:00	13.846	0	Scotland	1	Danger Reef	2	260.708
2018-09-17 18:00:00	13.846	0	Scotland	1	Danger Reef	2	260.75
2018-09-17 19:00:00	13.846	0	Scotland	1	Danger Reef	2	260.792
2018-09-17 20:00:00	13.846	10.8	Scotland	1	Danger Reef	2	260.833
2018-09-17 21:00:00	13.846	10.8	Scotland	1	Danger Reef	2	260.875
2018-09-17 22:00:00	13.846	0	Scotland	1	Danger Reef	2	260.917
2018-09-17 23:00:00	13.846	0	Scotland	1	Danger Reef	2	260.958
2018-09-18	13.846	0	Scotland	1	Danger Reef	2	261
2018-09-18 01:00:00	13.846	0	Scotland	1	Danger Reef	2	261.042
2018-09-18 02:00:00	13.846	0	Scotland	1	Danger Reef	2	261.083
2018-09-18 03:00:00	13.846	0	Scotland	1	Danger Reef	2	261.125
2018-09-18 04:00:00	13.846	0	Scotland	1	Danger Reef	2	261.167
2018-09-18 05:00:00	13.846	0	Scotland	1	Danger Reef	2	261.208
2018-09-18 06:00:00	13.75	0	Scotland	1	Danger Reef	2	261.25
2018-09-18 07:00:00	13.846	0	Scotland	1	Danger Reef	2	261.292
2018-09-18 08:00:00	13.75	0	Scotland	1	Danger Reef	2	261.333
2018-09-18 09:00:00	13.75	0	Scotland	1	Danger Reef	2	261.375
2018-09-18 10:00:00	13.75	0	Scotland	1	Danger Reef	2	261.417
2018-09-18 11:00:00	13.75	0	Scotland	1	Danger Reef	2	261.458
2018-09-18 12:00:00	13.75	0	Scotland	1	Danger Reef	2	261.5
2018-09-18 13:00:00	13.75	0	Scotland	1	Danger Reef	2	261.542
2018-09-18 14:00:00	13.75	0	Scotland	1	Danger Reef	2	261.583
2018-09-18 15:00:00	13.75	0	Scotland	1	Danger Reef	2	261.625
2018-09-18 16:00:00	13.75	0	Scotland	1	Danger Reef	2	261.667
2018-09-18 17:00:00	13.75	0	Scotland	1	Danger Reef	2	261.708
2018-09-18 18:00:00	13.75	0	Scotland	1	Danger Reef	2	261.75
2018-09-18 19:00:00	13.846	10.8	Scotland	1	Danger Reef	2	261.792
2018-09-18 20:00:00	13.846	10.8	Scotland	1	Danger Reef	2	261.833
2018-09-18 21:00:00	13.846	43.1	Scotland	1	Danger Reef	2	261.875
2018-09-18 22:00:00	13.846	53.8	Scotland	1	Danger Reef	2	261.917
2018-09-18 23:00:00	13.846	21.5	Scotland	1	Danger Reef	2	261.958
2018-09-19	13.846	0	Scotland	1	Danger Reef	2	262
2018-09-19 01:00:00	13.75	0	Scotland	1	Danger Reef	2	262.042
2018-09-19 02:00:00	13.75	0	Scotland	1	Danger Reef	2	262.083
2018-09-19 03:00:00	13.75	0	Scotland	1	Danger Reef	2	262.125
2018-09-19 04:00:00	13.75	0	Scotland	1	Danger Reef	2	262.167
2018-09-19 05:00:00	13.846	0	Scotland	1	Danger Reef	2	262.208
2018-09-19 06:00:00	13.75	0	Scotland	1	Danger Reef	2	262.25
2018-09-19 07:00:00	13.75	0	Scotland	1	Danger Reef	2	262.292
2018-09-19 08:00:00	13.75	0	Scotland	1	Danger Reef	2	262.333
2018-09-19 09:00:00	13.75	0	Scotland	1	Danger Reef	2	262.375
2018-09-19 10:00:00	13.75	0	Scotland	1	Danger Reef	2	262.417
2018-09-19 11:00:00	13.75	0	Scotland	1	Danger Reef	2	262.458
2018-09-19 12:00:00	13.75	0	Scotland	1	Danger Reef	2	262.5
2018-09-19 13:00:00	13.75	0	Scotland	1	Danger Reef	2	262.542
2018-09-19 14:00:00	13.75	0	Scotland	1	Danger Reef	2	262.583
2018-09-19 15:00:00	13.75	0	Scotland	1	Danger Reef	2	262.625
2018-09-19 16:00:00	13.846	0	Scotland	1	Danger Reef	2	262.667
2018-09-19 17:00:00	13.75	0	Scotland	1	Danger Reef	2	262.708
2018-09-19 18:00:00	13.75	75.3	Scotland	1	Danger Reef	2	262.75
2018-09-19 19:00:00	13.75	10.8	Scotland	1	Danger Reef	2	262.792
2018-09-19 20:00:00	13.654	10.8	Scotland	1	Danger Reef	2	262.833
2018-09-19 21:00:00	13.75	10.8	Scotland	1	Danger Reef	2	262.875
2018-09-19 22:00:00	13.75	0	Scotland	1	Danger Reef	2	262.917
2018-09-19 23:00:00	13.75	21.5	Scotland	1	Danger Reef	2	262.958
2018-09-20	13.75	0	Scotland	1	Danger Reef	2	263
2018-09-20 01:00:00	13.75	10.8	Scotland	1	Danger Reef	2	263.042
2018-09-20 02:00:00	13.75	0	Scotland	1	Danger Reef	2	263.083
2018-09-20 03:00:00	13.75	0	Scotland	1	Danger Reef	2	263.125
2018-09-20 04:00:00	13.75	0	Scotland	1	Danger Reef	2	263.167
2018-09-20 05:00:00	13.75	0	Scotland	1	Danger Reef	2	263.208
2018-09-20 06:00:00	13.75	0	Scotland	1	Danger Reef	2	263.25
2018-09-20 07:00:00	13.75	0	Scotland	1	Danger Reef	2	263.292
2018-09-20 08:00:00	13.75	0	Scotland	1	Danger Reef	2	263.333
2018-09-20 09:00:00	13.75	0	Scotland	1	Danger Reef	2	263.375
2018-09-20 10:00:00	13.75	0	Scotland	1	Danger Reef	2	263.417
2018-09-20 11:00:00	13.75	0	Scotland	1	Danger Reef	2	263.458
2018-09-20 12:00:00	13.75	0	Scotland	1	Danger Reef	2	263.5
2018-09-20 13:00:00	13.75	0	Scotland	1	Danger Reef	2	263.542
2018-09-20 14:00:00	13.75	0	Scotland	1	Danger Reef	2	263.583
2018-09-20 15:00:00	13.75	0	Scotland	1	Danger Reef	2	263.625
2018-09-20 16:00:00	13.75	0	Scotland	1	Danger Reef	2	263.667
2018-09-20 17:00:00	13.654	0	Scotland	1	Danger Reef	2	263.708
2018-09-20 18:00:00	13.75	0	Scotland	1	Danger Reef	2	263.75
2018-09-20 19:00:00	13.75	0	Scotland	1	Danger Reef	2	263.792
2018-09-20 20:00:00	13.75	0	Scotland	1	Danger Reef	2	263.833
2018-09-20 21:00:00	13.75	0	Scotland	1	Danger Reef	2	263.875
2018-09-20 22:00:00	13.75	0	Scotland	1	Danger Reef	2	263.917
2018-09-20 23:00:00	13.75	0	Scotland	1	Danger Reef	2	263.958
2018-09-21	13.75	0	Scotland	1	Danger Reef	2	264
2018-09-21 01:00:00	13.75	0	Scotland	1	Danger Reef	2	264.042
2018-09-21 02:00:00	13.75	0	Scotland	1	Danger Reef	2	264.083
2018-09-21 03:00:00	13.75	0	Scotland	1	Danger Reef	2	264.125
2018-09-21 04:00:00	13.75	0	Scotland	1	Danger Reef	2	264.167
2018-09-21 05:00:00	13.75	0	Scotland	1	Danger Reef	2	264.208
2018-09-21 06:00:00	13.75	0	Scotland	1	Danger Reef	2	264.25
2018-09-21 07:00:00	13.75	0	Scotland	1	Danger Reef	2	264.292
2018-09-21 08:00:00	13.75	0	Scotland	1	Danger Reef	2	264.333
2018-09-21 09:00:00	13.75	0	Scotland	1	Danger Reef	2	264.375
2018-09-21 10:00:00	13.75	0	Scotland	1	Danger Reef	2	264.417
2018-09-21 11:00:00	13.75	0	Scotland	1	Danger Reef	2	264.458
2018-09-21 12:00:00	13.75	0	Scotland	1	Danger Reef	2	264.5
2018-09-21 13:00:00	13.75	0	Scotland	1	Danger Reef	2	264.542
2018-09-21 14:00:00	13.75	0	Scotland	1	Danger Reef	2	264.583
2018-09-21 15:00:00	13.75	0	Scotland	1	Danger Reef	2	264.625
2018-09-21 16:00:00	13.75	43.1	Scotland	1	Danger Reef	2	264.667
2018-09-21 17:00:00	13.75	32.3	Scotland	1	Danger Reef	2	264.708
2018-09-21 18:00:00	13.75	43.1	Scotland	1	Danger Reef	2	264.75
2018-09-21 19:00:00	13.75	32.3	Scotland	1	Danger Reef	2	264.792
2018-09-21 20:00:00	13.75	10.8	Scotland	1	Danger Reef	2	264.833
2018-09-21 21:00:00	13.75	0	Scotland	1	Danger Reef	2	264.875
2018-09-21 22:00:00	13.75	10.8	Scotland	1	Danger Reef	2	264.917
2018-09-21 23:00:00	13.75	10.8	Scotland	1	Danger Reef	2	264.958
2018-09-22	13.75	0	Scotland	1	Danger Reef	2	265
2018-09-22 01:00:00	13.75	0	Scotland	1	Danger Reef	2	265.042
2018-09-22 02:00:00	13.75	0	Scotland	1	Danger Reef	2	265.083
2018-09-22 03:00:00	13.75	0	Scotland	1	Danger Reef	2	265.125
2018-09-22 04:00:00	13.75	0	Scotland	1	Danger Reef	2	265.167
2018-09-22 05:00:00	13.75	0	Scotland	1	Danger Reef	2	265.208
2018-09-22 06:00:00	13.75	0	Scotland	1	Danger Reef	2	265.25
2018-09-22 07:00:00	13.75	0	Scotland	1	Danger Reef	2	265.292
2018-09-22 08:00:00	13.75	0	Scotland	1	Danger Reef	2	265.333
2018-09-22 09:00:00	13.654	0	Scotland	1	Danger Reef	2	265.375
2018-09-22 10:00:00	13.75	0	Scotland	1	Danger Reef	2	265.417
2018-09-22 11:00:00	13.75	0	Scotland	1	Danger Reef	2	265.458
2018-09-22 12:00:00	13.75	0	Scotland	1	Danger Reef	2	265.5
2018-09-22 13:00:00	13.75	0	Scotland	1	Danger Reef	2	265.542
2018-09-22 14:00:00	13.75	0	Scotland	1	Danger Reef	2	265.583
2018-09-22 15:00:00	13.75	0	Scotland	1	Danger Reef	2	265.625
2018-09-22 16:00:00	13.75	0	Scotland	1	Danger Reef	2	265.667
2018-09-22 17:00:00	13.75	0	Scotland	1	Danger Reef	2	265.708
2018-09-22 18:00:00	13.75	10.8	Scotland	1	Danger Reef	2	265.75
2018-09-22 19:00:00	13.75	0	Scotland	1	Danger Reef	2	265.792
2018-09-22 20:00:00	13.75	10.8	Scotland	1	Danger Reef	2	265.833
2018-09-22 21:00:00	13.75	0	Scotland	1	Danger Reef	2	265.875
2018-09-22 22:00:00	13.75	10.8	Scotland	1	Danger Reef	2	265.917
2018-09-22 23:00:00	13.75	0	Scotland	1	Danger Reef	2	265.958
2018-09-23	13.75	0	Scotland	1	Danger Reef	2	266
2018-09-23 01:00:00	13.654	0	Scotland	1	Danger Reef	2	266.042
2018-09-23 02:00:00	13.75	0	Scotland	1	Danger Reef	2	266.083
2018-09-23 03:00:00	13.654	0	Scotland	1	Danger Reef	2	266.125
2018-09-23 04:00:00	13.75	0	Scotland	1	Danger Reef	2	266.167
2018-09-23 05:00:00	13.75	0	Scotland	1	Danger Reef	2	266.208
2018-09-23 06:00:00	13.75	0	Scotland	1	Danger Reef	2	266.25
2018-09-23 07:00:00	13.75	0	Scotland	1	Danger Reef	2	266.292
2018-09-23 08:00:00	13.75	0	Scotland	1	Danger Reef	2	266.333
2018-09-23 09:00:00	13.75	0	Scotland	1	Danger Reef	2	266.375
2018-09-23 10:00:00	13.654	0	Scotland	1	Danger Reef	2	266.417
2018-09-23 11:00:00	13.75	0	Scotland	1	Danger Reef	2	266.458
2018-09-23 12:00:00	13.75	0	Scotland	1	Danger Reef	2	266.5
2018-09-23 13:00:00	13.654	0	Scotland	1	Danger Reef	2	266.542
2018-09-23 14:00:00	13.654	0	Scotland	1	Danger Reef	2	266.583
2018-09-23 15:00:00	13.75	0	Scotland	1	Danger Reef	2	266.625
2018-09-23 16:00:00	13.654	10.8	Scotland	1	Danger Reef	2	266.667
2018-09-23 17:00:00	13.654	53.8	Scotland	1	Danger Reef	2	266.708
2018-09-23 18:00:00	13.75	129.2	Scotland	1	Danger Reef	2	266.75
2018-09-23 19:00:00	13.75	0	Scotland	1	Danger Reef	2	266.792
2018-09-23 20:00:00	13.75	10.8	Scotland	1	Danger Reef	2	266.833
2018-09-23 21:00:00	13.75	32.3	Scotland	1	Danger Reef	2	266.875
2018-09-23 22:00:00	13.75	10.8	Scotland	1	Danger Reef	2	266.917
2018-09-23 23:00:00	13.75	0	Scotland	1	Danger Reef	2	266.958
2018-09-24	13.75	10.8	Scotland	1	Danger Reef	2	267
2018-09-24 01:00:00	13.654	0	Scotland	1	Danger Reef	2	267.042
2018-09-24 02:00:00	13.654	0	Scotland	1	Danger Reef	2	267.083
2018-09-24 03:00:00	13.75	0	Scotland	1	Danger Reef	2	267.125
2018-09-24 04:00:00	13.75	0	Scotland	1	Danger Reef	2	267.167
2018-09-24 05:00:00	13.654	0	Scotland	1	Danger Reef	2	267.208
2018-09-24 06:00:00	13.75	0	Scotland	1	Danger Reef	2	267.25
2018-09-24 07:00:00	13.75	0	Scotland	1	Danger Reef	2	267.292
2018-09-24 08:00:00	13.75	0	Scotland	1	Danger Reef	2	267.333
2018-09-24 09:00:00	13.75	0	Scotland	1	Danger Reef	2	267.375
2018-09-24 10:00:00	13.75	0	Scotland	1	Danger Reef	2	267.417
2018-09-24 11:00:00	13.654	0	Scotland	1	Danger Reef	2	267.458
2018-09-24 12:00:00	13.75	0	Scotland	1	Danger Reef	2	267.5
2018-09-24 13:00:00	13.75	0	Scotland	1	Danger Reef	2	267.542
2018-09-24 14:00:00	13.75	0	Scotland	1	Danger Reef	2	267.583
2018-09-24 15:00:00	13.75	0	Scotland	1	Danger Reef	2	267.625
2018-09-24 16:00:00	13.75	43.1	Scotland	1	Danger Reef	2	267.667
2018-09-24 17:00:00	13.654	21.5	Scotland	1	Danger Reef	2	267.708
2018-09-24 18:00:00	13.75	107.6	Scotland	1	Danger Reef	2	267.75
2018-09-24 19:00:00	13.75	43.1	Scotland	1	Danger Reef	2	267.792
2018-09-24 20:00:00	13.75	64.6	Scotland	1	Danger Reef	2	267.833
2018-09-24 21:00:00	13.654	10.8	Scotland	1	Danger Reef	2	267.875
2018-09-24 22:00:00	13.75	21.5	Scotland	1	Danger Reef	2	267.917
2018-09-24 23:00:00	13.654	0	Scotland	1	Danger Reef	2	267.958
2018-09-25	13.75	0	Scotland	1	Danger Reef	2	268
2018-09-25 01:00:00	13.75	0	Scotland	1	Danger Reef	2	268.042
2018-09-25 02:00:00	13.75	0	Scotland	1	Danger Reef	2	268.083
2018-09-25 03:00:00	13.75	0	Scotland	1	Danger Reef	2	268.125
2018-09-25 04:00:00	13.75	0	Scotland	1	Danger Reef	2	268.167
2018-09-25 05:00:00	13.654	0	Scotland	1	Danger Reef	2	268.208
2018-09-25 06:00:00	13.75	0	Scotland	1	Danger Reef	2	268.25
2018-09-25 07:00:00	13.654	0	Scotland	1	Danger Reef	2	268.292
2018-09-25 08:00:00	13.654	0	Scotland	1	Danger Reef	2	268.333
2018-09-25 09:00:00	13.654	0	Scotland	1	Danger Reef	2	268.375
2018-09-25 10:00:00	13.654	0	Scotland	1	Danger Reef	2	268.417
2018-09-25 11:00:00	13.654	0	Scotland	1	Danger Reef	2	268.458
2018-09-25 12:00:00	13.654	0	Scotland	1	Danger Reef	2	268.5
2018-09-25 13:00:00	13.654	0	Scotland	1	Danger Reef	2	268.542
2018-09-25 14:00:00	13.654	0	Scotland	1	Danger Reef	2	268.583
2018-09-25 15:00:00	13.75	0	Scotland	1	Danger Reef	2	268.625
2018-09-25 16:00:00	13.75	0	Scotland	1	Danger Reef	2	268.667
2018-09-25 17:00:00	13.654	0	Scotland	1	Danger Reef	2	268.708
2018-09-25 18:00:00	13.654	10.8	Scotland	1	Danger Reef	2	268.75
2018-09-25 19:00:00	13.654	0	Scotland	1	Danger Reef	2	268.792
2018-09-25 20:00:00	13.558	0	Scotland	1	Danger Reef	2	268.833
2018-09-25 21:00:00	13.654	0	Scotland	1	Danger Reef	2	268.875
2018-09-25 22:00:00	13.654	0	Scotland	1	Danger Reef	2	268.917
2018-09-25 23:00:00	13.654	0	Scotland	1	Danger Reef	2	268.958
2018-09-26	13.654	0	Scotland	1	Danger Reef	2	269
2018-09-26 01:00:00	13.654	0	Scotland	1	Danger Reef	2	269.042
2018-09-26 02:00:00	13.654	0	Scotland	1	Danger Reef	2	269.083
2018-09-26 03:00:00	13.654	0	Scotland	1	Danger Reef	2	269.125
2018-09-26 04:00:00	13.654	0	Scotland	1	Danger Reef	2	269.167
2018-09-26 05:00:00	13.654	0	Scotland	1	Danger Reef	2	269.208
2018-09-26 06:00:00	13.461	0	Scotland	1	Danger Reef	2	269.25
2018-09-26 07:00:00	13.461	0	Scotland	1	Danger Reef	2	269.292
2018-09-26 08:00:00	13.269	0	Scotland	1	Danger Reef	2	269.333
2018-09-26 09:00:00	13.269	0	Scotland	1	Danger Reef	2	269.375
2018-09-26 10:00:00	13.365	0	Scotland	1	Danger Reef	2	269.417
2018-09-26 11:00:00	13.461	0	Scotland	1	Danger Reef	2	269.458
2018-09-26 12:00:00	13.558	0	Scotland	1	Danger Reef	2	269.5
2018-09-26 13:00:00	13.558	0	Scotland	1	Danger Reef	2	269.542
2018-09-26 14:00:00	13.654	0	Scotland	1	Danger Reef	2	269.583
2018-09-26 15:00:00	13.654	0	Scotland	1	Danger Reef	2	269.625
2018-09-26 16:00:00	13.558	0	Scotland	1	Danger Reef	2	269.667
2018-09-26 17:00:00	13.558	0	Scotland	1	Danger Reef	2	269.708
2018-09-26 18:00:00	13.558	10.8	Scotland	1	Danger Reef	2	269.75
2018-09-26 19:00:00	13.558	0	Scotland	1	Danger Reef	2	269.792
2018-09-26 20:00:00	13.558	0	Scotland	1	Danger Reef	2	269.833
2018-09-26 21:00:00	13.461	0	Scotland	1	Danger Reef	2	269.875
2018-09-26 22:00:00	13.558	0	Scotland	1	Danger Reef	2	269.917
2018-09-26 23:00:00	13.558	0	Scotland	1	Danger Reef	2	269.958
2018-09-01	13.654	32.3	Scotland	1	Danger Reef	2	244
2018-09-01 01:00:00	13.654	10.8	Scotland	1	Danger Reef	2	244.042
2018-09-01 02:00:00	13.75	0	Scotland	1	Danger Reef	2	244.083
2018-09-01 03:00:00	13.75	0	Scotland	1	Danger Reef	2	244.125
2018-09-01 04:00:00	13.75	0	Scotland	1	Danger Reef	2	244.167
2018-09-01 05:00:00	13.75	0	Scotland	1	Danger Reef	2	244.208
2018-09-01 06:00:00	13.75	0	Scotland	1	Danger Reef	2	244.25
2018-09-01 07:00:00	13.654	0	Scotland	1	Danger Reef	2	244.292
2018-09-01 08:00:00	13.654	0	Scotland	1	Danger Reef	2	244.333
2018-09-01 09:00:00	13.654	0	Scotland	1	Danger Reef	2	244.375
2018-09-01 10:00:00	13.654	0	Scotland	1	Danger Reef	2	244.417
2018-09-01 11:00:00	13.75	0	Scotland	1	Danger Reef	2	244.458
2018-09-01 12:00:00	13.75	0	Scotland	1	Danger Reef	2	244.5
2018-09-01 13:00:00	13.654	0	Scotland	1	Danger Reef	2	244.542
2018-09-01 14:00:00	13.654	0	Scotland	1	Danger Reef	2	244.583
2018-09-01 15:00:00	13.654	0	Scotland	1	Danger Reef	2	244.625
2018-09-01 16:00:00	13.846	0	Scotland	1	Danger Reef	2	244.667
2018-09-01 17:00:00	13.846	43.1	Scotland	1	Danger Reef	2	244.708
2018-09-01 18:00:00	13.75	43.1	Scotland	1	Danger Reef	2	244.75
2018-09-01 19:00:00	13.75	32.3	Scotland	1	Danger Reef	2	244.792
2018-09-01 20:00:00	13.75	161.5	Scotland	1	Danger Reef	2	244.833
2018-09-01 21:00:00	13.654	64.6	Scotland	1	Danger Reef	2	244.875
2018-09-01 22:00:00	13.75	150.7	Scotland	1	Danger Reef	2	244.917
2018-09-01 23:00:00	13.75	86.1	Scotland	1	Danger Reef	2	244.958
2018-09-02	13.75	43.1	Scotland	1	Danger Reef	2	245
2018-09-02 01:00:00	13.75	0	Scotland	1	Danger Reef	2	245.042
2018-09-02 02:00:00	13.75	0	Scotland	1	Danger Reef	2	245.083
2018-09-02 03:00:00	13.846	0	Scotland	1	Danger Reef	2	245.125
2018-09-02 04:00:00	13.75	0	Scotland	1	Danger Reef	2	245.167
2018-09-02 05:00:00	13.75	0	Scotland	1	Danger Reef	2	245.208
2018-09-02 06:00:00	13.75	0	Scotland	1	Danger Reef	2	245.25
2018-09-02 07:00:00	13.75	0	Scotland	1	Danger Reef	2	245.292
2018-09-02 08:00:00	13.75	0	Scotland	1	Danger Reef	2	245.333
2018-09-02 09:00:00	13.75	0	Scotland	1	Danger Reef	2	245.375
2018-09-02 10:00:00	13.75	0	Scotland	1	Danger Reef	2	245.417
2018-09-02 11:00:00	13.75	0	Scotland	1	Danger Reef	2	245.458
2018-09-02 12:00:00	13.846	0	Scotland	1	Danger Reef	2	245.5
2018-09-02 13:00:00	13.75	0	Scotland	1	Danger Reef	2	245.542
2018-09-02 14:00:00	13.75	0	Scotland	1	Danger Reef	2	245.583
2018-09-02 15:00:00	13.75	0	Scotland	1	Danger Reef	2	245.625
2018-09-02 16:00:00	13.75	0	Scotland	1	Danger Reef	2	245.667
2018-09-02 17:00:00	13.75	0	Scotland	1	Danger Reef	2	245.708
2018-09-02 18:00:00	13.846	129.2	Scotland	1	Danger Reef	2	245.75
2018-09-02 19:00:00	13.75	247.6	Scotland	1	Danger Reef	2	245.792
2018-09-02 20:00:00	13.75	21.5	Scotland	1	Danger Reef	2	245.833
2018-09-02 21:00:00	13.75	118.4	Scotland	1	Danger Reef	2	245.875
2018-09-02 22:00:00	13.75	21.5	Scotland	1	Danger Reef	2	245.917
2018-09-02 23:00:00	13.75	10.8	Scotland	1	Danger Reef	2	245.958
2018-09-03	13.75	10.8	Scotland	1	Danger Reef	2	246
2018-09-03 01:00:00	13.75	0	Scotland	1	Danger Reef	2	246.042
2018-09-03 02:00:00	13.75	0	Scotland	1	Danger Reef	2	246.083
2018-09-03 03:00:00	13.75	0	Scotland	1	Danger Reef	2	246.125
2018-09-03 04:00:00	13.75	0	Scotland	1	Danger Reef	2	246.167
2018-09-03 05:00:00	13.75	0	Scotland	1	Danger Reef	2	246.208
2018-09-03 06:00:00	13.846	0	Scotland	1	Danger Reef	2	246.25
2018-09-03 07:00:00	13.75	0	Scotland	1	Danger Reef	2	246.292
2018-09-03 08:00:00	13.75	0	Scotland	1	Danger Reef	2	246.333
2018-09-03 09:00:00	13.75	0	Scotland	1	Danger Reef	2	246.375
2018-09-03 10:00:00	13.75	0	Scotland	1	Danger Reef	2	246.417
2018-09-03 11:00:00	13.846	0	Scotland	1	Danger Reef	2	246.458
2018-09-03 12:00:00	13.75	0	Scotland	1	Danger Reef	2	246.5
2018-09-03 13:00:00	13.75	0	Scotland	1	Danger Reef	2	246.542
2018-09-03 14:00:00	13.75	0	Scotland	1	Danger Reef	2	246.583
2018-09-03 15:00:00	13.75	43.1	Scotland	1	Danger Reef	2	246.625
2018-09-03 16:00:00	13.846	139.9	Scotland	1	Danger Reef	2	246.667
2018-09-03 17:00:00	13.846	247.6	Scotland	1	Danger Reef	2	246.708
2018-09-03 18:00:00	13.846	312.2	Scotland	1	Danger Reef	2	246.75
2018-09-03 19:00:00	13.846	312.2	Scotland	1	Danger Reef	2	246.792
2018-09-03 20:00:00	13.846	247.6	Scotland	1	Danger Reef	2	246.833
2018-09-03 21:00:00	13.846	172.2	Scotland	1	Danger Reef	2	246.875
2018-09-03 22:00:00	13.846	118.4	Scotland	1	Danger Reef	2	246.917
2018-09-03 23:00:00	13.75	75.3	Scotland	1	Danger Reef	2	246.958
2018-09-04	13.75	53.8	Scotland	1	Danger Reef	2	247
2018-09-04 01:00:00	13.75	32.3	Scotland	1	Danger Reef	2	247.042
2018-09-04 02:00:00	13.846	10.8	Scotland	1	Danger Reef	2	247.083
2018-09-04 03:00:00	13.75	0	Scotland	1	Danger Reef	2	247.125
2018-09-04 04:00:00	13.846	0	Scotland	1	Danger Reef	2	247.167
2018-09-04 05:00:00	13.846	0	Scotland	1	Danger Reef	2	247.208
2018-09-04 06:00:00	13.846	0	Scotland	1	Danger Reef	2	247.25
2018-09-04 07:00:00	13.846	0	Scotland	1	Danger Reef	2	247.292
2018-09-04 08:00:00	13.846	0	Scotland	1	Danger Reef	2	247.333
2018-09-04 09:00:00	13.75	0	Scotland	1	Danger Reef	2	247.375
2018-09-04 10:00:00	13.75	0	Scotland	1	Danger Reef	2	247.417
2018-09-04 11:00:00	13.75	0	Scotland	1	Danger Reef	2	247.458
2018-09-04 12:00:00	13.75	0	Scotland	1	Danger Reef	2	247.5
2018-09-04 13:00:00	13.75	0	Scotland	1	Danger Reef	2	247.542
2018-09-04 14:00:00	13.75	0	Scotland	1	Danger Reef	2	247.583
2018-09-04 15:00:00	13.846	64.6	Scotland	1	Danger Reef	2	247.625
2018-09-04 16:00:00	13.846	204.5	Scotland	1	Danger Reef	2	247.667
2018-09-04 17:00:00	13.846	344.4	Scotland	1	Danger Reef	2	247.708
2018-09-04 18:00:00	13.846	398.3	Scotland	1	Danger Reef	2	247.75
2018-09-04 19:00:00	13.846	333.7	Scotland	1	Danger Reef	2	247.792
2018-09-04 20:00:00	13.846	258.3	Scotland	1	Danger Reef	2	247.833
2018-09-04 21:00:00	13.846	161.5	Scotland	1	Danger Reef	2	247.875
2018-09-04 22:00:00	13.846	96.9	Scotland	1	Danger Reef	2	247.917
2018-09-04 23:00:00	13.75	86.1	Scotland	1	Danger Reef	2	247.958
2018-09-05	13.75	64.6	Scotland	1	Danger Reef	2	248
2018-09-05 01:00:00	13.75	21.5	Scotland	1	Danger Reef	2	248.042
2018-09-05 02:00:00	13.75	0	Scotland	1	Danger Reef	2	248.083
2018-09-05 03:00:00	13.846	0	Scotland	1	Danger Reef	2	248.125
2018-09-05 04:00:00	13.846	0	Scotland	1	Danger Reef	2	248.167
2018-09-05 05:00:00	14.038	0	Scotland	1	Danger Reef	2	248.208
2018-09-05 06:00:00	13.846	0	Scotland	1	Danger Reef	2	248.25
2018-09-05 07:00:00	13.846	0	Scotland	1	Danger Reef	2	248.292
2018-09-05 08:00:00	13.846	0	Scotland	1	Danger Reef	2	248.333
2018-09-05 09:00:00	13.846	0	Scotland	1	Danger Reef	2	248.375
2018-09-05 10:00:00	13.846	0	Scotland	1	Danger Reef	2	248.417
2018-09-05 11:00:00	13.846	0	Scotland	1	Danger Reef	2	248.458
2018-09-05 12:00:00	13.75	0	Scotland	1	Danger Reef	2	248.5
2018-09-05 13:00:00	13.75	0	Scotland	1	Danger Reef	2	248.542
2018-09-05 14:00:00	13.75	0	Scotland	1	Danger Reef	2	248.583
2018-09-05 15:00:00	13.75	0	Scotland	1	Danger Reef	2	248.625
2018-09-05 16:00:00	13.75	10.8	Scotland	1	Danger Reef	2	248.667
2018-09-05 17:00:00	13.846	21.5	Scotland	1	Danger Reef	2	248.708
2018-09-05 18:00:00	13.846	10.8	Scotland	1	Danger Reef	2	248.75
2018-09-05 19:00:00	13.75	21.5	Scotland	1	Danger Reef	2	248.792
2018-09-05 20:00:00	13.846	0	Scotland	1	Danger Reef	2	248.833
2018-09-05 21:00:00	13.846	53.8	Scotland	1	Danger Reef	2	248.875
2018-09-05 22:00:00	13.846	21.5	Scotland	1	Danger Reef	2	248.917
2018-09-05 23:00:00	13.75	10.8	Scotland	1	Danger Reef	2	248.958
2018-09-06	13.75	10.8	Scotland	1	Danger Reef	2	249
2018-09-06 01:00:00	13.75	0	Scotland	1	Danger Reef	2	249.042
2018-09-06 02:00:00	13.846	0	Scotland	1	Danger Reef	2	249.083
2018-09-06 03:00:00	13.846	0	Scotland	1	Danger Reef	2	249.125
2018-09-06 04:00:00	13.846	0	Scotland	1	Danger Reef	2	249.167
2018-09-06 05:00:00	13.846	0	Scotland	1	Danger Reef	2	249.208
2018-09-06 06:00:00	13.846	0	Scotland	1	Danger Reef	2	249.25
2018-09-06 07:00:00	13.846	0	Scotland	1	Danger Reef	2	249.292
2018-09-06 08:00:00	13.846	0	Scotland	1	Danger Reef	2	249.333
2018-09-06 09:00:00	13.846	0	Scotland	1	Danger Reef	2	249.375
2018-09-06 10:00:00	13.846	0	Scotland	1	Danger Reef	2	249.417
2018-09-06 11:00:00	13.846	0	Scotland	1	Danger Reef	2	249.458
2018-09-06 12:00:00	13.846	0	Scotland	1	Danger Reef	2	249.5
2018-09-06 13:00:00	13.846	0	Scotland	1	Danger Reef	2	249.542
2018-09-06 14:00:00	13.75	0	Scotland	1	Danger Reef	2	249.583
2018-09-06 15:00:00	13.75	10.8	Scotland	1	Danger Reef	2	249.625
2018-09-06 16:00:00	13.75	32.3	Scotland	1	Danger Reef	2	249.667
2018-09-06 17:00:00	13.846	387.5	Scotland	1	Danger Reef	2	249.708
2018-09-06 18:00:00	13.942	333.7	Scotland	1	Danger Reef	2	249.75
2018-09-06 19:00:00	13.942	258.3	Scotland	1	Danger Reef	2	249.792
2018-09-06 20:00:00	13.942	21.5	Scotland	1	Danger Reef	2	249.833
2018-09-06 21:00:00	13.846	129.2	Scotland	1	Danger Reef	2	249.875
2018-09-06 22:00:00	13.846	86.1	Scotland	1	Danger Reef	2	249.917
2018-09-06 23:00:00	13.846	10.8	Scotland	1	Danger Reef	2	249.958
2018-09-07	13.846	10.8	Scotland	1	Danger Reef	2	250
2018-09-07 01:00:00	13.75	10.8	Scotland	1	Danger Reef	2	250.042
2018-09-07 02:00:00	13.75	0	Scotland	1	Danger Reef	2	250.083
2018-09-07 03:00:00	13.846	0	Scotland	1	Danger Reef	2	250.125
2018-09-07 04:00:00	13.846	0	Scotland	1	Danger Reef	2	250.167
2018-09-07 05:00:00	13.846	0	Scotland	1	Danger Reef	2	250.208
2018-09-07 06:00:00	13.846	0	Scotland	1	Danger Reef	2	250.25
2018-09-07 07:00:00	13.846	0	Scotland	1	Danger Reef	2	250.292
2018-09-07 08:00:00	13.846	0	Scotland	1	Danger Reef	2	250.333
2018-09-07 09:00:00	13.942	0	Scotland	1	Danger Reef	2	250.375
2018-09-07 10:00:00	13.846	0	Scotland	1	Danger Reef	2	250.417
2018-09-07 11:00:00	13.846	0	Scotland	1	Danger Reef	2	250.458
2018-09-07 12:00:00	13.846	0	Scotland	1	Danger Reef	2	250.5
2018-09-07 13:00:00	13.942	0	Scotland	1	Danger Reef	2	250.542
2018-09-07 14:00:00	13.846	0	Scotland	1	Danger Reef	2	250.583
2018-09-07 15:00:00	13.75	53.8	Scotland	1	Danger Reef	2	250.625
2018-09-07 16:00:00	13.846	172.2	Scotland	1	Danger Reef	2	250.667
2018-09-07 17:00:00	13.846	247.6	Scotland	1	Danger Reef	2	250.708
2018-09-07 18:00:00	13.846	118.4	Scotland	1	Danger Reef	2	250.75
2018-09-07 19:00:00	13.846	86.1	Scotland	1	Danger Reef	2	250.792
2018-09-07 20:00:00	13.846	161.5	Scotland	1	Danger Reef	2	250.833
2018-09-07 21:00:00	13.846	32.3	Scotland	1	Danger Reef	2	250.875
2018-09-07 22:00:00	13.846	43.1	Scotland	1	Danger Reef	2	250.917
2018-09-07 23:00:00	13.846	32.3	Scotland	1	Danger Reef	2	250.958
2018-09-08	13.846	21.5	Scotland	1	Danger Reef	2	251
2018-09-08 01:00:00	13.846	21.5	Scotland	1	Danger Reef	2	251.042
2018-09-08 02:00:00	13.846	0	Scotland	1	Danger Reef	2	251.083
2018-09-08 03:00:00	13.75	0	Scotland	1	Danger Reef	2	251.125
2018-09-08 04:00:00	13.75	0	Scotland	1	Danger Reef	2	251.167
2018-09-08 05:00:00	13.75	0	Scotland	1	Danger Reef	2	251.208
2018-09-08 06:00:00	13.75	0	Scotland	1	Danger Reef	2	251.25
2018-09-08 07:00:00	13.846	0	Scotland	1	Danger Reef	2	251.292
2018-09-08 08:00:00	13.75	0	Scotland	1	Danger Reef	2	251.333
2018-09-08 09:00:00	13.846	0	Scotland	1	Danger Reef	2	251.375
2018-09-08 10:00:00	13.75	0	Scotland	1	Danger Reef	2	251.417
2018-09-08 11:00:00	13.846	0	Scotland	1	Danger Reef	2	251.458
2018-09-08 12:00:00	13.846	0	Scotland	1	Danger Reef	2	251.5
2018-09-08 13:00:00	13.846	0	Scotland	1	Danger Reef	2	251.542
2018-09-08 14:00:00	13.846	0	Scotland	1	Danger Reef	2	251.583
2018-09-08 15:00:00	13.75	10.8	Scotland	1	Danger Reef	2	251.625
2018-09-08 16:00:00	13.846	32.3	Scotland	1	Danger Reef	2	251.667
2018-09-08 17:00:00	13.75	43.1	Scotland	1	Danger Reef	2	251.708
2018-09-08 18:00:00	13.846	172.2	Scotland	1	Danger Reef	2	251.75
2018-09-08 19:00:00	13.846	75.3	Scotland	1	Danger Reef	2	251.792
2018-09-08 20:00:00	13.75	75.3	Scotland	1	Danger Reef	2	251.833
2018-09-08 21:00:00	13.75	21.5	Scotland	1	Danger Reef	2	251.875
2018-09-08 22:00:00	13.75	53.8	Scotland	1	Danger Reef	2	251.917
2018-09-08 23:00:00	13.846	64.6	Scotland	1	Danger Reef	2	251.958
2018-09-09	13.846	10.8	Scotland	1	Danger Reef	2	252
2018-09-09 01:00:00	13.846	0	Scotland	1	Danger Reef	2	252.042
2018-09-09 02:00:00	13.846	0	Scotland	1	Danger Reef	2	252.083
2018-09-09 03:00:00	13.75	0	Scotland	1	Danger Reef	2	252.125
2018-09-09 04:00:00	13.75	0	Scotland	1	Danger Reef	2	252.167
2018-09-09 05:00:00	13.75	0	Scotland	1	Danger Reef	2	252.208
2018-09-09 06:00:00	13.846	0	Scotland	1	Danger Reef	2	252.25
2018-09-09 07:00:00	13.846	0	Scotland	1	Danger Reef	2	252.292
2018-09-09 08:00:00	13.75	0	Scotland	1	Danger Reef	2	252.333
2018-09-09 09:00:00	13.75	0	Scotland	1	Danger Reef	2	252.375
2018-09-09 10:00:00	13.846	0	Scotland	1	Danger Reef	2	252.417
2018-09-09 11:00:00	13.75	0	Scotland	1	Danger Reef	2	252.458
2018-09-09 12:00:00	13.942	0	Scotland	1	Danger Reef	2	252.5
2018-09-09 13:00:00	13.846	0	Scotland	1	Danger Reef	2	252.542
2018-09-09 14:00:00	13.846	0	Scotland	1	Danger Reef	2	252.583
2018-09-09 15:00:00	13.75	0	Scotland	1	Danger Reef	2	252.625
2018-09-09 16:00:00	13.75	21.5	Scotland	1	Danger Reef	2	252.667
2018-09-09 17:00:00	13.75	53.8	Scotland	1	Danger Reef	2	252.708
2018-09-09 18:00:00	13.75	43.1	Scotland	1	Danger Reef	2	252.75
2018-09-09 19:00:00	13.846	64.6	Scotland	1	Danger Reef	2	252.792
2018-09-09 20:00:00	13.846	64.6	Scotland	1	Danger Reef	2	252.833
2018-09-09 21:00:00	13.846	32.3	Scotland	1	Danger Reef	2	252.875
2018-09-09 22:00:00	13.846	32.3	Scotland	1	Danger Reef	2	252.917
2018-09-09 23:00:00	13.846	32.3	Scotland	1	Danger Reef	2	252.958
2018-09-10	13.846	10.8	Scotland	1	Danger Reef	2	253
2018-09-10 01:00:00	13.846	0	Scotland	1	Danger Reef	2	253.042
2018-09-10 02:00:00	13.846	0	Scotland	1	Danger Reef	2	253.083
2018-09-10 03:00:00	13.846	0	Scotland	1	Danger Reef	2	253.125
2018-09-10 04:00:00	13.846	0	Scotland	1	Danger Reef	2	253.167
2018-09-10 05:00:00	14.038	0	Scotland	1	Danger Reef	2	253.208
2018-09-10 06:00:00	13.942	0	Scotland	1	Danger Reef	2	253.25
2018-09-10 07:00:00	14.038	0	Scotland	1	Danger Reef	2	253.292
2018-09-10 08:00:00	14.038	0	Scotland	1	Danger Reef	2	253.333
2018-09-10 09:00:00	14.038	0	Scotland	1	Danger Reef	2	253.375
2018-09-10 10:00:00	14.038	0	Scotland	1	Danger Reef	2	253.417
2018-09-10 11:00:00	14.038	0	Scotland	1	Danger Reef	2	253.458
2018-09-10 12:00:00	14.038	0	Scotland	1	Danger Reef	2	253.5
2018-09-10 13:00:00	14.038	0	Scotland	1	Danger Reef	2	253.542
2018-09-10 14:00:00	14.038	0	Scotland	1	Danger Reef	2	253.583
2018-09-10 15:00:00	13.942	0	Scotland	1	Danger Reef	2	253.625
2018-09-10 16:00:00	13.846	0	Scotland	1	Danger Reef	2	253.667
2018-09-10 17:00:00	14.038	0	Scotland	1	Danger Reef	2	253.708
2018-09-10 18:00:00	14.038	53.8	Scotland	1	Danger Reef	2	253.75
2018-09-10 19:00:00	13.942	0	Scotland	1	Danger Reef	2	253.792
2018-09-10 20:00:00	13.942	32.3	Scotland	1	Danger Reef	2	253.833
2018-09-10 21:00:00	13.942	10.8	Scotland	1	Danger Reef	2	253.875
2018-09-10 22:00:00	13.942	0	Scotland	1	Danger Reef	2	253.917
2018-09-10 23:00:00	13.942	0	Scotland	1	Danger Reef	2	253.958
2018-09-11	13.942	0	Scotland	1	Danger Reef	2	254
2018-09-11 01:00:00	13.942	0	Scotland	1	Danger Reef	2	254.042
2018-09-11 02:00:00	13.942	0	Scotland	1	Danger Reef	2	254.083
2018-09-11 03:00:00	13.846	0	Scotland	1	Danger Reef	2	254.125
2018-09-11 04:00:00	13.846	0	Scotland	1	Danger Reef	2	254.167
2018-09-11 05:00:00	13.942	0	Scotland	1	Danger Reef	2	254.208
2018-09-11 06:00:00	13.846	0	Scotland	1	Danger Reef	2	254.25
2018-09-11 07:00:00	13.846	0	Scotland	1	Danger Reef	2	254.292
2018-09-11 08:00:00	13.846	0	Scotland	1	Danger Reef	2	254.333
2018-09-11 09:00:00	13.942	0	Scotland	1	Danger Reef	2	254.375
2018-09-11 10:00:00	13.942	0	Scotland	1	Danger Reef	2	254.417
2018-09-11 11:00:00	13.942	0	Scotland	1	Danger Reef	2	254.458
2018-09-11 12:00:00	13.942	0	Scotland	1	Danger Reef	2	254.5
2018-09-11 13:00:00	13.942	0	Scotland	1	Danger Reef	2	254.542
2018-09-11 14:00:00	13.942	0	Scotland	1	Danger Reef	2	254.583
2018-09-11 15:00:00	13.846	0	Scotland	1	Danger Reef	2	254.625
2018-09-11 16:00:00	13.942	0	Scotland	1	Danger Reef	2	254.667
2018-09-11 17:00:00	13.942	86.1	Scotland	1	Danger Reef	2	254.708
2018-09-11 18:00:00	13.942	290.6	Scotland	1	Danger Reef	2	254.75
2018-09-11 19:00:00	13.942	96.9	Scotland	1	Danger Reef	2	254.792
2018-09-11 20:00:00	13.846	32.3	Scotland	1	Danger Reef	2	254.833
2018-09-11 21:00:00	13.942	21.5	Scotland	1	Danger Reef	2	254.875
2018-09-11 22:00:00	13.942	0	Scotland	1	Danger Reef	2	254.917
2018-09-11 23:00:00	13.942	0	Scotland	1	Danger Reef	2	254.958
2018-09-12	13.942	0	Scotland	1	Danger Reef	2	255
2018-09-12 01:00:00	13.942	0	Scotland	1	Danger Reef	2	255.042
2018-09-12 02:00:00	13.942	0	Scotland	1	Danger Reef	2	255.083
2018-09-12 03:00:00	13.942	0	Scotland	1	Danger Reef	2	255.125
2018-09-12 04:00:00	13.942	0	Scotland	1	Danger Reef	2	255.167
2018-09-12 05:00:00	13.846	0	Scotland	1	Danger Reef	2	255.208
2018-09-12 06:00:00	13.846	0	Scotland	1	Danger Reef	2	255.25
2018-09-12 07:00:00	13.846	0	Scotland	1	Danger Reef	2	255.292
2018-09-12 08:00:00	13.846	0	Scotland	1	Danger Reef	2	255.333
2018-09-12 09:00:00	13.846	0	Scotland	1	Danger Reef	2	255.375
2018-09-12 10:00:00	13.846	0	Scotland	1	Danger Reef	2	255.417
2018-09-12 11:00:00	13.846	0	Scotland	1	Danger Reef	2	255.458
2018-09-12 12:00:00	13.846	0	Scotland	1	Danger Reef	2	255.5
2018-09-12 13:00:00	13.846	0	Scotland	1	Danger Reef	2	255.542
2018-09-12 14:00:00	13.846	0	Scotland	1	Danger Reef	2	255.583
2018-09-12 15:00:00	13.846	0	Scotland	1	Danger Reef	2	255.625
2018-09-12 16:00:00	13.846	21.5	Scotland	1	Danger Reef	2	255.667
2018-09-12 17:00:00	13.846	32.3	Scotland	1	Danger Reef	2	255.708
2018-09-12 18:00:00	13.846	139.9	Scotland	1	Danger Reef	2	255.75
2018-09-12 19:00:00	13.846	269.1	Scotland	1	Danger Reef	2	255.792
2018-09-12 20:00:00	13.846	322.9	Scotland	1	Danger Reef	2	255.833
2018-09-12 21:00:00	13.942	118.4	Scotland	1	Danger Reef	2	255.875
2018-09-12 22:00:00	13.942	53.8	Scotland	1	Danger Reef	2	255.917
2018-09-12 23:00:00	13.846	10.8	Scotland	1	Danger Reef	2	255.958
2018-07-18 23:00:00	12.207	279.9	Scotland	1	Danger Reef	1	199.958
2018-07-19	12.11	312.2	Scotland	1	Danger Reef	1	200
2018-07-19 01:00:00	12.11	172.2	Scotland	1	Danger Reef	1	200.042
2018-07-19 02:00:00	12.11	86.1	Scotland	1	Danger Reef	1	200.083
2018-07-19 03:00:00	12.11	21.5	Scotland	1	Danger Reef	1	200.125
2018-07-19 04:00:00	12.207	0	Scotland	1	Danger Reef	1	200.167
2018-07-19 05:00:00	12.401	0	Scotland	1	Danger Reef	1	200.208
2018-07-19 06:00:00	12.304	0	Scotland	1	Danger Reef	1	200.25
2018-07-19 07:00:00	12.207	0	Scotland	1	Danger Reef	1	200.292
2018-07-19 08:00:00	12.11	0	Scotland	1	Danger Reef	1	200.333
2018-07-19 09:00:00	12.11	0	Scotland	1	Danger Reef	1	200.375
2018-07-19 10:00:00	12.11	0	Scotland	1	Danger Reef	1	200.417
2018-07-19 11:00:00	12.11	0	Scotland	1	Danger Reef	1	200.458
2018-07-19 12:00:00	12.013	0	Scotland	1	Danger Reef	1	200.5
2018-07-19 13:00:00	12.11	32.3	Scotland	1	Danger Reef	1	200.542
2018-07-19 14:00:00	12.11	129.2	Scotland	1	Danger Reef	1	200.583
2018-07-19 15:00:00	12.11	215.3	Scotland	1	Danger Reef	1	200.625
2018-07-19 16:00:00	12.11	581.3	Scotland	1	Danger Reef	1	200.667
2018-07-19 17:00:00	12.207	753.5	Scotland	1	Danger Reef	1	200.708
2018-07-19 18:00:00	12.304	721.2	Scotland	1	Danger Reef	1	200.75
2018-07-19 19:00:00	12.207	333.7	Scotland	1	Danger Reef	1	200.792
2018-07-19 20:00:00	12.207	290.6	Scotland	1	Danger Reef	1	200.833
2018-07-19 21:00:00	12.11	581.3	Scotland	1	Danger Reef	1	200.875
2018-07-19 22:00:00	12.207	333.7	Scotland	1	Danger Reef	1	200.917
2018-07-19 23:00:00	12.11	366	Scotland	1	Danger Reef	1	200.958
2018-07-20	12.207	355.2	Scotland	1	Danger Reef	1	201
2018-07-20 01:00:00	12.11	247.6	Scotland	1	Danger Reef	1	201.042
2018-07-20 02:00:00	12.11	75.3	Scotland	1	Danger Reef	1	201.083
2018-07-20 03:00:00	12.11	0	Scotland	1	Danger Reef	1	201.125
2018-07-20 04:00:00	12.304	0	Scotland	1	Danger Reef	1	201.167
2018-07-20 05:00:00	12.207	0	Scotland	1	Danger Reef	1	201.208
2018-07-20 06:00:00	12.304	0	Scotland	1	Danger Reef	1	201.25
2018-07-20 07:00:00	12.207	0	Scotland	1	Danger Reef	1	201.292
2018-07-20 08:00:00	12.304	0	Scotland	1	Danger Reef	1	201.333
2018-07-20 09:00:00	12.207	0	Scotland	1	Danger Reef	1	201.375
2018-07-20 10:00:00	12.207	0	Scotland	1	Danger Reef	1	201.417
2018-07-20 11:00:00	12.207	0	Scotland	1	Danger Reef	1	201.458
2018-07-20 12:00:00	12.11	0	Scotland	1	Danger Reef	1	201.5
2018-07-20 13:00:00	12.11	0	Scotland	1	Danger Reef	1	201.542
2018-07-20 14:00:00	12.11	10.8	Scotland	1	Danger Reef	1	201.583
2018-07-20 15:00:00	12.11	21.5	Scotland	1	Danger Reef	1	201.625
2018-07-20 16:00:00	12.207	96.9	Scotland	1	Danger Reef	1	201.667
2018-07-20 17:00:00	12.207	96.9	Scotland	1	Danger Reef	1	201.708
2018-07-20 18:00:00	12.11	193.8	Scotland	1	Danger Reef	1	201.75
2018-07-20 19:00:00	12.207	150.7	Scotland	1	Danger Reef	1	201.792
2018-07-20 20:00:00	12.207	312.2	Scotland	1	Danger Reef	1	201.833
2018-07-20 21:00:00	12.207	441.3	Scotland	1	Danger Reef	1	201.875
2018-07-20 22:00:00	12.207	452.1	Scotland	1	Danger Reef	1	201.917
2018-07-20 23:00:00	12.11	193.8	Scotland	1	Danger Reef	1	201.958
2018-07-21	12.11	247.6	Scotland	1	Danger Reef	1	202
2018-07-21 01:00:00	12.207	118.4	Scotland	1	Danger Reef	1	202.042
2018-07-21 02:00:00	12.11	86.1	Scotland	1	Danger Reef	1	202.083
2018-07-21 03:00:00	12.11	21.5	Scotland	1	Danger Reef	1	202.125
2018-07-21 04:00:00	12.11	10.8	Scotland	1	Danger Reef	1	202.167
2018-07-21 05:00:00	12.207	0	Scotland	1	Danger Reef	1	202.208
2018-07-21 06:00:00	12.207	0	Scotland	1	Danger Reef	1	202.25
2018-07-21 07:00:00	12.207	0	Scotland	1	Danger Reef	1	202.292
2018-07-21 08:00:00	12.401	0	Scotland	1	Danger Reef	1	202.333
2018-07-21 09:00:00	12.207	0	Scotland	1	Danger Reef	1	202.375
2018-07-21 10:00:00	12.11	0	Scotland	1	Danger Reef	1	202.417
2018-07-21 11:00:00	12.207	0	Scotland	1	Danger Reef	1	202.458
2018-07-21 12:00:00	12.207	0	Scotland	1	Danger Reef	1	202.5
2018-07-21 13:00:00	12.207	0	Scotland	1	Danger Reef	1	202.542
2018-07-21 14:00:00	12.207	96.9	Scotland	1	Danger Reef	1	202.583
2018-07-21 15:00:00	12.207	53.8	Scotland	1	Danger Reef	1	202.625
2018-07-21 16:00:00	12.207	139.9	Scotland	1	Danger Reef	1	202.667
2018-07-21 17:00:00	12.207	333.7	Scotland	1	Danger Reef	1	202.708
2018-07-21 18:00:00	12.207	473.6	Scotland	1	Danger Reef	1	202.75
2018-07-21 19:00:00	12.207	150.7	Scotland	1	Danger Reef	1	202.792
2018-07-21 20:00:00	12.304	430.6	Scotland	1	Danger Reef	1	202.833
2018-07-21 21:00:00	12.304	193.8	Scotland	1	Danger Reef	1	202.875
2018-07-21 22:00:00	12.304	139.9	Scotland	1	Danger Reef	1	202.917
2018-07-21 23:00:00	12.304	150.7	Scotland	1	Danger Reef	1	202.958
2018-07-22	12.304	64.6	Scotland	1	Danger Reef	1	203
2018-07-22 01:00:00	12.304	64.6	Scotland	1	Danger Reef	1	203.042
2018-07-22 02:00:00	12.304	43.1	Scotland	1	Danger Reef	1	203.083
2018-07-22 03:00:00	12.304	21.5	Scotland	1	Danger Reef	1	203.125
2018-07-22 04:00:00	12.304	10.8	Scotland	1	Danger Reef	1	203.167
2018-07-22 05:00:00	12.401	0	Scotland	1	Danger Reef	1	203.208
2018-07-22 06:00:00	12.401	0	Scotland	1	Danger Reef	1	203.25
2018-07-22 07:00:00	12.497	0	Scotland	1	Danger Reef	1	203.292
2018-07-22 08:00:00	12.401	0	Scotland	1	Danger Reef	1	203.333
2018-07-22 09:00:00	12.401	0	Scotland	1	Danger Reef	1	203.375
2018-07-22 10:00:00	12.497	0	Scotland	1	Danger Reef	1	203.417
2018-07-22 11:00:00	12.304	0	Scotland	1	Danger Reef	1	203.458
2018-07-22 12:00:00	12.207	0	Scotland	1	Danger Reef	1	203.5
2018-07-22 13:00:00	12.207	0	Scotland	1	Danger Reef	1	203.542
2018-07-22 14:00:00	12.401	0	Scotland	1	Danger Reef	1	203.583
2018-07-22 15:00:00	12.304	21.5	Scotland	1	Danger Reef	1	203.625
2018-07-22 16:00:00	12.304	32.3	Scotland	1	Danger Reef	1	203.667
2018-07-22 17:00:00	12.401	53.8	Scotland	1	Danger Reef	1	203.708
2018-07-22 18:00:00	12.401	75.3	Scotland	1	Danger Reef	1	203.75
2018-07-22 19:00:00	12.497	107.6	Scotland	1	Danger Reef	1	203.792
2018-07-22 20:00:00	12.497	129.2	Scotland	1	Danger Reef	1	203.833
2018-07-22 21:00:00	12.497	86.1	Scotland	1	Danger Reef	1	203.875
2018-07-22 22:00:00	12.497	53.8	Scotland	1	Danger Reef	1	203.917
2018-07-22 23:00:00	12.401	53.8	Scotland	1	Danger Reef	1	203.958
2018-07-23	12.497	32.3	Scotland	1	Danger Reef	1	204
2018-07-23 01:00:00	12.304	21.5	Scotland	1	Danger Reef	1	204.042
2018-07-23 02:00:00	12.304	32.3	Scotland	1	Danger Reef	1	204.083
2018-07-23 03:00:00	12.401	10.8	Scotland	1	Danger Reef	1	204.125
2018-07-23 04:00:00	12.497	0	Scotland	1	Danger Reef	1	204.167
2018-07-23 05:00:00	12.497	0	Scotland	1	Danger Reef	1	204.208
2018-07-23 06:00:00	12.497	0	Scotland	1	Danger Reef	1	204.25
2018-07-23 07:00:00	12.594	0	Scotland	1	Danger Reef	1	204.292
2018-07-23 08:00:00	12.401	0	Scotland	1	Danger Reef	1	204.333
2018-07-23 09:00:00	12.497	0	Scotland	1	Danger Reef	1	204.375
2018-07-23 10:00:00	12.497	0	Scotland	1	Danger Reef	1	204.417
2018-07-23 11:00:00	12.401	0	Scotland	1	Danger Reef	1	204.458
2018-07-23 12:00:00	12.401	0	Scotland	1	Danger Reef	1	204.5
2018-07-23 13:00:00	12.304	0	Scotland	1	Danger Reef	1	204.542
2018-07-23 14:00:00	12.304	10.8	Scotland	1	Danger Reef	1	204.583
2018-07-23 15:00:00	12.401	107.6	Scotland	1	Danger Reef	1	204.625
2018-07-23 16:00:00	12.401	64.6	Scotland	1	Danger Reef	1	204.667
2018-07-23 17:00:00	12.497	344.4	Scotland	1	Danger Reef	1	204.708
2018-07-23 18:00:00	12.594	398.3	Scotland	1	Danger Reef	1	204.75
2018-07-23 19:00:00	12.69	312.2	Scotland	1	Danger Reef	1	204.792
2018-07-23 20:00:00	12.594	129.2	Scotland	1	Danger Reef	1	204.833
2018-07-23 21:00:00	12.497	64.6	Scotland	1	Danger Reef	1	204.875
2018-07-23 22:00:00	12.594	86.1	Scotland	1	Danger Reef	1	204.917
2018-07-23 23:00:00	12.69	150.7	Scotland	1	Danger Reef	1	204.958
2018-07-24	12.594	96.9	Scotland	1	Danger Reef	1	205
2018-07-24 01:00:00	12.594	129.2	Scotland	1	Danger Reef	1	205.042
2018-07-24 02:00:00	12.401	118.4	Scotland	1	Danger Reef	1	205.083
2018-07-24 03:00:00	12.304	32.3	Scotland	1	Danger Reef	1	205.125
2018-07-24 04:00:00	12.69	0	Scotland	1	Danger Reef	1	205.167
2018-07-24 05:00:00	12.497	0	Scotland	1	Danger Reef	1	205.208
2018-07-24 06:00:00	12.497	0	Scotland	1	Danger Reef	1	205.25
2018-07-24 07:00:00	12.497	0	Scotland	1	Danger Reef	1	205.292
2018-07-24 08:00:00	12.594	0	Scotland	1	Danger Reef	1	205.333
2018-07-24 09:00:00	12.497	0	Scotland	1	Danger Reef	1	205.375
2018-07-24 10:00:00	12.594	0	Scotland	1	Danger Reef	1	205.417
2018-07-24 11:00:00	12.594	0	Scotland	1	Danger Reef	1	205.458
2018-07-24 12:00:00	12.497	0	Scotland	1	Danger Reef	1	205.5
2018-07-24 13:00:00	12.594	0	Scotland	1	Danger Reef	1	205.542
2018-07-24 14:00:00	12.594	53.8	Scotland	1	Danger Reef	1	205.583
2018-07-24 15:00:00	12.401	183	Scotland	1	Danger Reef	1	205.625
2018-07-24 16:00:00	12.497	96.9	Scotland	1	Danger Reef	1	205.667
2018-07-24 17:00:00	12.497	118.4	Scotland	1	Danger Reef	1	205.708
2018-07-24 18:00:00	12.594	215.3	Scotland	1	Danger Reef	1	205.75
2018-07-24 19:00:00	12.594	785.8	Scotland	1	Danger Reef	1	205.792
2018-07-24 20:00:00	12.594	721.2	Scotland	1	Danger Reef	1	205.833
2018-07-24 21:00:00	12.497	290.6	Scotland	1	Danger Reef	1	205.875
2018-07-24 22:00:00	12.787	355.2	Scotland	1	Danger Reef	1	205.917
2018-07-24 23:00:00	12.497	150.7	Scotland	1	Danger Reef	1	205.958
2018-07-25	12.594	150.7	Scotland	1	Danger Reef	1	206
2018-07-25 01:00:00	12.594	107.6	Scotland	1	Danger Reef	1	206.042
2018-07-25 02:00:00	12.594	86.1	Scotland	1	Danger Reef	1	206.083
2018-07-25 03:00:00	12.497	32.3	Scotland	1	Danger Reef	1	206.125
2018-07-25 04:00:00	12.594	10.8	Scotland	1	Danger Reef	1	206.167
2018-07-25 05:00:00	12.594	0	Scotland	1	Danger Reef	1	206.208
2018-07-25 06:00:00	12.594	0	Scotland	1	Danger Reef	1	206.25
2018-07-25 07:00:00	12.594	0	Scotland	1	Danger Reef	1	206.292
2018-07-25 08:00:00	12.594	0	Scotland	1	Danger Reef	1	206.333
2018-07-25 09:00:00	12.69	0	Scotland	1	Danger Reef	1	206.375
2018-07-25 10:00:00	12.401	0	Scotland	1	Danger Reef	1	206.417
2018-07-25 11:00:00	12.594	0	Scotland	1	Danger Reef	1	206.458
2018-07-25 12:00:00	12.594	0	Scotland	1	Danger Reef	1	206.5
2018-07-25 13:00:00	12.594	0	Scotland	1	Danger Reef	1	206.542
2018-07-25 14:00:00	12.594	53.8	Scotland	1	Danger Reef	1	206.583
2018-07-25 15:00:00	12.594	86.1	Scotland	1	Danger Reef	1	206.625
2018-07-25 16:00:00	12.401	172.2	Scotland	1	Danger Reef	1	206.667
2018-07-25 17:00:00	12.401	301.4	Scotland	1	Danger Reef	1	206.708
2018-07-25 18:00:00	12.497	1216.3	Scotland	1	Danger Reef	1	206.75
2018-07-25 19:00:00	12.497	1313.2	Scotland	1	Danger Reef	1	206.792
2018-07-25 20:00:00	12.594	882.6	Scotland	1	Danger Reef	1	206.833
2018-07-25 21:00:00	12.497	559.7	Scotland	1	Danger Reef	1	206.875
2018-07-25 22:00:00	12.497	333.7	Scotland	1	Danger Reef	1	206.917
2018-07-25 23:00:00	12.497	215.3	Scotland	1	Danger Reef	1	206.958
2018-07-26	12.594	139.9	Scotland	1	Danger Reef	1	207
2018-07-26 01:00:00	12.594	86.1	Scotland	1	Danger Reef	1	207.042
2018-07-26 02:00:00	12.594	53.8	Scotland	1	Danger Reef	1	207.083
2018-07-26 03:00:00	12.497	32.3	Scotland	1	Danger Reef	1	207.125
2018-07-26 04:00:00	12.401	10.8	Scotland	1	Danger Reef	1	207.167
2018-07-26 05:00:00	12.69	0	Scotland	1	Danger Reef	1	207.208
2018-07-26 06:00:00	12.497	0	Scotland	1	Danger Reef	1	207.25
2018-07-26 07:00:00	12.401	0	Scotland	1	Danger Reef	1	207.292
2018-07-26 08:00:00	12.497	0	Scotland	1	Danger Reef	1	207.333
2018-07-26 09:00:00	12.497	0	Scotland	1	Danger Reef	1	207.375
2018-07-26 10:00:00	12.497	0	Scotland	1	Danger Reef	1	207.417
2018-07-26 11:00:00	12.594	0	Scotland	1	Danger Reef	1	207.458
2018-07-26 12:00:00	12.497	0	Scotland	1	Danger Reef	1	207.5
2018-07-26 13:00:00	12.594	10.8	Scotland	1	Danger Reef	1	207.542
2018-07-26 14:00:00	12.594	64.6	Scotland	1	Danger Reef	1	207.583
2018-07-26 15:00:00	12.497	183	Scotland	1	Danger Reef	1	207.625
2018-07-26 16:00:00	12.497	409	Scotland	1	Danger Reef	1	207.667
2018-07-26 17:00:00	12.497	796.5	Scotland	1	Danger Reef	1	207.708
2018-07-26 18:00:00	12.594	1130.2	Scotland	1	Danger Reef	1	207.75
2018-07-26 19:00:00	12.69	312.2	Scotland	1	Danger Reef	1	207.792
2018-07-26 20:00:00	12.69	914.9	Scotland	1	Danger Reef	1	207.833
2018-07-26 21:00:00	12.69	656.6	Scotland	1	Danger Reef	1	207.875
2018-07-26 22:00:00	12.787	419.8	Scotland	1	Danger Reef	1	207.917
2018-07-26 23:00:00	12.69	258.3	Scotland	1	Danger Reef	1	207.958
2018-07-27	13.75	150.7	Scotland	1	Danger Reef	1	208
2018-07-27 01:00:00	12.883	107.6	Scotland	1	Danger Reef	1	208.042
2018-07-27 02:00:00	12.69	64.6	Scotland	1	Danger Reef	1	208.083
2018-07-27 03:00:00	12.497	21.5	Scotland	1	Danger Reef	1	208.125
2018-07-27 04:00:00	12.497	0	Scotland	1	Danger Reef	1	208.167
2018-07-27 05:00:00	12.401	0	Scotland	1	Danger Reef	1	208.208
2018-07-27 06:00:00	12.401	0	Scotland	1	Danger Reef	1	208.25
2018-07-27 07:00:00	12.497	0	Scotland	1	Danger Reef	1	208.292
2018-07-27 08:00:00	12.98	0	Scotland	1	Danger Reef	1	208.333
2018-07-27 09:00:00	12.69	0	Scotland	1	Danger Reef	1	208.375
2018-07-27 10:00:00	12.497	0	Scotland	1	Danger Reef	1	208.417
2018-07-27 11:00:00	12.594	0	Scotland	1	Danger Reef	1	208.458
2018-07-27 12:00:00	12.69	0	Scotland	1	Danger Reef	1	208.5
2018-07-27 13:00:00	12.594	10.8	Scotland	1	Danger Reef	1	208.542
2018-07-27 14:00:00	12.497	0	Scotland	1	Danger Reef	1	208.583
2018-07-27 15:00:00	12.594	32.3	Scotland	1	Danger Reef	1	208.625
2018-07-27 16:00:00	12.69	64.6	Scotland	1	Danger Reef	1	208.667
2018-07-27 17:00:00	12.594	64.6	Scotland	1	Danger Reef	1	208.708
2018-07-27 18:00:00	12.594	53.8	Scotland	1	Danger Reef	1	208.75
2018-07-27 19:00:00	12.401	678.1	Scotland	1	Danger Reef	1	208.792
2018-07-27 20:00:00	12.69	139.9	Scotland	1	Danger Reef	1	208.833
2018-07-27 21:00:00	12.883	86.1	Scotland	1	Danger Reef	1	208.875
2018-07-27 22:00:00	12.497	64.6	Scotland	1	Danger Reef	1	208.917
2018-07-27 23:00:00	12.497	150.7	Scotland	1	Danger Reef	1	208.958
2018-07-28	12.594	139.9	Scotland	1	Danger Reef	1	209
2018-07-28 01:00:00	12.594	43.1	Scotland	1	Danger Reef	1	209.042
2018-07-28 02:00:00	12.98	53.8	Scotland	1	Danger Reef	1	209.083
2018-07-28 03:00:00	12.787	21.5	Scotland	1	Danger Reef	1	209.125
2018-07-28 04:00:00	12.594	0	Scotland	1	Danger Reef	1	209.167
2018-07-28 05:00:00	12.497	0	Scotland	1	Danger Reef	1	209.208
2018-07-28 06:00:00	12.401	0	Scotland	1	Danger Reef	1	209.25
2018-07-28 07:00:00	12.401	0	Scotland	1	Danger Reef	1	209.292
2018-07-28 08:00:00	12.497	0	Scotland	1	Danger Reef	1	209.333
2018-07-28 09:00:00	12.594	0	Scotland	1	Danger Reef	1	209.375
2018-07-28 10:00:00	12.594	0	Scotland	1	Danger Reef	1	209.417
2018-07-28 11:00:00	12.594	0	Scotland	1	Danger Reef	1	209.458
2018-07-28 12:00:00	12.401	0	Scotland	1	Danger Reef	1	209.5
2018-07-28 13:00:00	12.401	0	Scotland	1	Danger Reef	1	209.542
2018-07-28 14:00:00	12.883	10.8	Scotland	1	Danger Reef	1	209.583
2018-07-28 15:00:00	12.787	32.3	Scotland	1	Danger Reef	1	209.625
2018-07-28 16:00:00	12.69	441.3	Scotland	1	Danger Reef	1	209.667
2018-07-28 17:00:00	12.594	107.6	Scotland	1	Danger Reef	1	209.708
2018-07-28 18:00:00	12.69	10.8	Scotland	1	Danger Reef	1	209.75
2018-07-28 19:00:00	12.594	86.1	Scotland	1	Danger Reef	1	209.792
2018-07-28 20:00:00	12.497	21.5	Scotland	1	Danger Reef	1	209.833
2018-07-28 21:00:00	12.594	527.4	Scotland	1	Danger Reef	1	209.875
2018-07-28 22:00:00	12.497	118.4	Scotland	1	Danger Reef	1	209.917
2018-07-28 23:00:00	12.497	53.8	Scotland	1	Danger Reef	1	209.958
2018-07-29	12.401	43.1	Scotland	1	Danger Reef	1	210
2018-07-29 01:00:00	12.401	107.6	Scotland	1	Danger Reef	1	210.042
2018-07-29 02:00:00	12.497	32.3	Scotland	1	Danger Reef	1	210.083
2018-07-29 03:00:00	12.787	0	Scotland	1	Danger Reef	1	210.125
2018-07-29 04:00:00	12.594	0	Scotland	1	Danger Reef	1	210.167
2018-07-29 05:00:00	12.401	0	Scotland	1	Danger Reef	1	210.208
2018-07-29 06:00:00	12.401	0	Scotland	1	Danger Reef	1	210.25
2018-07-29 07:00:00	12.69	0	Scotland	1	Danger Reef	1	210.292
2018-07-29 08:00:00	13.076	0	Scotland	1	Danger Reef	1	210.333
2018-07-29 09:00:00	13.076	0	Scotland	1	Danger Reef	1	210.375
2018-07-29 10:00:00	12.883	0	Scotland	1	Danger Reef	1	210.417
2018-07-29 11:00:00	12.883	0	Scotland	1	Danger Reef	1	210.458
2018-07-29 12:00:00	12.98	0	Scotland	1	Danger Reef	1	210.5
2018-07-29 13:00:00	12.98	0	Scotland	1	Danger Reef	1	210.542
2018-07-29 14:00:00	12.98	21.5	Scotland	1	Danger Reef	1	210.583
2018-07-29 15:00:00	12.98	64.6	Scotland	1	Danger Reef	1	210.625
2018-07-29 16:00:00	12.98	193.8	Scotland	1	Danger Reef	1	210.667
2018-07-29 17:00:00	12.883	290.6	Scotland	1	Danger Reef	1	210.708
2018-07-29 18:00:00	12.883	53.8	Scotland	1	Danger Reef	1	210.75
2018-07-29 19:00:00	12.98	75.3	Scotland	1	Danger Reef	1	210.792
2018-07-29 20:00:00	12.98	75.3	Scotland	1	Danger Reef	1	210.833
2018-07-29 21:00:00	12.883	96.9	Scotland	1	Danger Reef	1	210.875
2018-07-29 22:00:00	12.883	96.9	Scotland	1	Danger Reef	1	210.917
2018-07-29 23:00:00	12.883	107.6	Scotland	1	Danger Reef	1	210.958
2018-07-30	12.883	43.1	Scotland	1	Danger Reef	1	211
2018-07-30 01:00:00	12.883	43.1	Scotland	1	Danger Reef	1	211.042
2018-07-30 02:00:00	12.883	10.8	Scotland	1	Danger Reef	1	211.083
2018-07-30 03:00:00	12.883	0	Scotland	1	Danger Reef	1	211.125
2018-07-30 04:00:00	12.883	0	Scotland	1	Danger Reef	1	211.167
2018-07-30 05:00:00	12.883	0	Scotland	1	Danger Reef	1	211.208
2018-07-30 06:00:00	12.883	0	Scotland	1	Danger Reef	1	211.25
2018-07-30 07:00:00	12.98	0	Scotland	1	Danger Reef	1	211.292
2018-07-30 08:00:00	12.883	0	Scotland	1	Danger Reef	1	211.333
2018-07-30 09:00:00	12.883	0	Scotland	1	Danger Reef	1	211.375
2018-07-30 10:00:00	12.883	0	Scotland	1	Danger Reef	1	211.417
2018-07-30 11:00:00	12.787	0	Scotland	1	Danger Reef	1	211.458
2018-07-30 12:00:00	12.787	0	Scotland	1	Danger Reef	1	211.5
2018-07-30 13:00:00	12.883	0	Scotland	1	Danger Reef	1	211.542
2018-07-30 14:00:00	12.69	0	Scotland	1	Danger Reef	1	211.583
2018-07-30 15:00:00	12.787	10.8	Scotland	1	Danger Reef	1	211.625
2018-07-30 16:00:00	12.883	32.3	Scotland	1	Danger Reef	1	211.667
2018-07-30 17:00:00	12.883	204.5	Scotland	1	Danger Reef	1	211.708
2018-07-30 18:00:00	12.787	430.6	Scotland	1	Danger Reef	1	211.75
2018-07-30 19:00:00	12.883	129.2	Scotland	1	Danger Reef	1	211.792
2018-07-30 20:00:00	12.69	290.6	Scotland	1	Danger Reef	1	211.833
2018-07-30 21:00:00	12.787	172.2	Scotland	1	Danger Reef	1	211.875
2018-07-30 22:00:00	12.787	398.3	Scotland	1	Danger Reef	1	211.917
2018-07-30 23:00:00	12.883	32.3	Scotland	1	Danger Reef	1	211.958
2018-07-31	12.69	75.3	Scotland	1	Danger Reef	1	212
2018-07-31 01:00:00	12.69	21.5	Scotland	1	Danger Reef	1	212.042
2018-07-31 02:00:00	12.69	10.8	Scotland	1	Danger Reef	1	212.083
2018-07-31 03:00:00	12.69	0	Scotland	1	Danger Reef	1	212.125
2018-07-31 04:00:00	12.69	0	Scotland	1	Danger Reef	1	212.167
2018-07-31 05:00:00	12.69	0	Scotland	1	Danger Reef	1	212.208
2018-07-31 06:00:00	12.69	0	Scotland	1	Danger Reef	1	212.25
2018-07-31 07:00:00	12.69	0	Scotland	1	Danger Reef	1	212.292
2018-07-31 08:00:00	12.69	0	Scotland	1	Danger Reef	1	212.333
2018-07-31 09:00:00	12.69	0	Scotland	1	Danger Reef	1	212.375
2018-07-31 10:00:00	12.69	0	Scotland	1	Danger Reef	1	212.417
2018-07-31 11:00:00	12.69	0	Scotland	1	Danger Reef	1	212.458
2018-07-31 12:00:00	12.69	0	Scotland	1	Danger Reef	1	212.5
2018-07-31 13:00:00	12.69	0	Scotland	1	Danger Reef	1	212.542
2018-07-31 14:00:00	12.787	0	Scotland	1	Danger Reef	1	212.583
2018-07-31 15:00:00	12.787	32.3	Scotland	1	Danger Reef	1	212.625
2018-07-31 16:00:00	12.787	75.3	Scotland	1	Danger Reef	1	212.667
2018-07-31 17:00:00	12.787	226	Scotland	1	Danger Reef	1	212.708
2018-07-31 18:00:00	12.787	96.9	Scotland	1	Danger Reef	1	212.75
2018-07-31 19:00:00	12.787	75.3	Scotland	1	Danger Reef	1	212.792
2018-07-31 20:00:00	12.69	53.8	Scotland	1	Danger Reef	1	212.833
2018-07-31 21:00:00	12.787	43.1	Scotland	1	Danger Reef	1	212.875
2018-07-31 22:00:00	12.883	64.6	Scotland	1	Danger Reef	1	212.917
2018-07-31 23:00:00	12.98	53.8	Scotland	1	Danger Reef	1	212.958
2018-08-13	13.269	10.8	Scotland	1	Danger Reef	1	225
2018-08-13 01:00:00	13.269	10.8	Scotland	1	Danger Reef	1	225.042
2018-08-13 02:00:00	13.269	0	Scotland	1	Danger Reef	1	225.083
2018-08-13 03:00:00	13.269	0	Scotland	1	Danger Reef	1	225.125
2018-08-13 04:00:00	13.269	0	Scotland	1	Danger Reef	1	225.167
2018-08-13 05:00:00	13.269	0	Scotland	1	Danger Reef	1	225.208
2018-08-13 06:00:00	13.269	0	Scotland	1	Danger Reef	1	225.25
2018-08-13 07:00:00	13.269	0	Scotland	1	Danger Reef	1	225.292
2018-08-13 08:00:00	13.269	0	Scotland	1	Danger Reef	1	225.333
2018-08-13 09:00:00	13.269	0	Scotland	1	Danger Reef	1	225.375
2018-08-13 10:00:00	13.173	0	Scotland	1	Danger Reef	1	225.417
2018-08-13 11:00:00	13.173	0	Scotland	1	Danger Reef	1	225.458
2018-08-13 12:00:00	13.173	0	Scotland	1	Danger Reef	1	225.5
2018-08-13 13:00:00	13.173	0	Scotland	1	Danger Reef	1	225.542
2018-08-13 14:00:00	13.269	0	Scotland	1	Danger Reef	1	225.583
2018-08-13 15:00:00	13.365	0	Scotland	1	Danger Reef	1	225.625
2018-08-13 16:00:00	13.269	10.8	Scotland	1	Danger Reef	1	225.667
2018-08-13 17:00:00	13.269	64.6	Scotland	1	Danger Reef	1	225.708
2018-08-13 18:00:00	13.269	96.9	Scotland	1	Danger Reef	1	225.75
2018-08-13 19:00:00	13.269	172.2	Scotland	1	Danger Reef	1	225.792
2018-08-13 20:00:00	13.269	96.9	Scotland	1	Danger Reef	1	225.833
2018-08-13 21:00:00	13.269	204.5	Scotland	1	Danger Reef	1	225.875
2018-08-13 22:00:00	13.269	172.2	Scotland	1	Danger Reef	1	225.917
2018-08-13 23:00:00	13.173	21.5	Scotland	1	Danger Reef	1	225.958
2018-08-14	13.173	10.8	Scotland	1	Danger Reef	1	226
2018-08-14 01:00:00	13.269	10.8	Scotland	1	Danger Reef	1	226.042
2018-08-14 02:00:00	13.269	21.5	Scotland	1	Danger Reef	1	226.083
2018-08-14 03:00:00	13.365	0	Scotland	1	Danger Reef	1	226.125
2018-08-14 04:00:00	13.365	0	Scotland	1	Danger Reef	1	226.167
2018-08-14 05:00:00	13.269	0	Scotland	1	Danger Reef	1	226.208
2018-08-14 06:00:00	13.269	0	Scotland	1	Danger Reef	1	226.25
2018-08-14 07:00:00	13.173	0	Scotland	1	Danger Reef	1	226.292
2018-08-14 08:00:00	13.365	0	Scotland	1	Danger Reef	1	226.333
2018-08-14 09:00:00	13.269	0	Scotland	1	Danger Reef	1	226.375
2018-08-14 10:00:00	13.269	0	Scotland	1	Danger Reef	1	226.417
2018-08-14 11:00:00	13.173	0	Scotland	1	Danger Reef	1	226.458
2018-08-14 12:00:00	13.269	0	Scotland	1	Danger Reef	1	226.5
2018-08-14 13:00:00	13.269	0	Scotland	1	Danger Reef	1	226.542
2018-08-14 14:00:00	13.365	0	Scotland	1	Danger Reef	1	226.583
2018-08-14 15:00:00	13.365	0	Scotland	1	Danger Reef	1	226.625
2018-08-14 16:00:00	13.269	0	Scotland	1	Danger Reef	1	226.667
2018-08-14 17:00:00	13.269	10.8	Scotland	1	Danger Reef	1	226.708
2018-08-14 18:00:00	13.269	10.8	Scotland	1	Danger Reef	1	226.75
2018-08-14 19:00:00	13.269	75.3	Scotland	1	Danger Reef	1	226.792
2018-08-14 20:00:00	13.269	118.4	Scotland	1	Danger Reef	1	226.833
2018-08-14 21:00:00	13.269	64.6	Scotland	1	Danger Reef	1	226.875
2018-08-14 22:00:00	13.365	129.2	Scotland	1	Danger Reef	1	226.917
2018-08-14 23:00:00	13.269	129.2	Scotland	1	Danger Reef	1	226.958
2018-08-15	13.461	53.8	Scotland	1	Danger Reef	1	227
2018-08-15 01:00:00	13.461	0	Scotland	1	Danger Reef	1	227.042
2018-08-15 02:00:00	13.365	0	Scotland	1	Danger Reef	1	227.083
2018-08-15 03:00:00	13.365	0	Scotland	1	Danger Reef	1	227.125
2018-08-15 04:00:00	13.365	0	Scotland	1	Danger Reef	1	227.167
2018-08-15 05:00:00	13.269	0	Scotland	1	Danger Reef	1	227.208
2018-08-15 06:00:00	13.269	0	Scotland	1	Danger Reef	1	227.25
2018-08-15 07:00:00	13.365	0	Scotland	1	Danger Reef	1	227.292
2018-08-15 08:00:00	13.269	0	Scotland	1	Danger Reef	1	227.333
2018-08-15 09:00:00	13.365	0	Scotland	1	Danger Reef	1	227.375
2018-08-15 10:00:00	13.365	0	Scotland	1	Danger Reef	1	227.417
2018-08-15 11:00:00	13.269	0	Scotland	1	Danger Reef	1	227.458
2018-08-15 12:00:00	13.269	0	Scotland	1	Danger Reef	1	227.5
2018-08-15 13:00:00	13.365	0	Scotland	1	Danger Reef	1	227.542
2018-08-15 14:00:00	13.365	0	Scotland	1	Danger Reef	1	227.583
2018-08-15 15:00:00	13.365	10.8	Scotland	1	Danger Reef	1	227.625
2018-08-15 16:00:00	13.461	0	Scotland	1	Danger Reef	1	227.667
2018-08-15 17:00:00	13.461	0	Scotland	1	Danger Reef	1	227.708
2018-08-15 18:00:00	13.365	21.5	Scotland	1	Danger Reef	1	227.75
2018-08-15 19:00:00	13.365	43.1	Scotland	1	Danger Reef	1	227.792
2018-08-15 20:00:00	13.365	10.8	Scotland	1	Danger Reef	1	227.833
2018-08-15 21:00:00	13.365	43.1	Scotland	1	Danger Reef	1	227.875
2018-08-15 22:00:00	13.461	10.8	Scotland	1	Danger Reef	1	227.917
2018-08-15 23:00:00	13.461	32.3	Scotland	1	Danger Reef	1	227.958
2018-08-16	13.365	0	Scotland	1	Danger Reef	1	228
2018-08-16 01:00:00	13.365	0	Scotland	1	Danger Reef	1	228.042
2018-08-16 02:00:00	13.365	0	Scotland	1	Danger Reef	1	228.083
2018-08-16 03:00:00	13.461	0	Scotland	1	Danger Reef	1	228.125
2018-08-16 04:00:00	13.365	0	Scotland	1	Danger Reef	1	228.167
2018-08-16 05:00:00	13.461	0	Scotland	1	Danger Reef	1	228.208
2018-08-16 06:00:00	13.461	0	Scotland	1	Danger Reef	1	228.25
2018-08-16 07:00:00	13.365	0	Scotland	1	Danger Reef	1	228.292
2018-08-16 08:00:00	13.365	0	Scotland	1	Danger Reef	1	228.333
2018-08-16 09:00:00	13.365	0	Scotland	1	Danger Reef	1	228.375
2018-08-16 10:00:00	13.365	0	Scotland	1	Danger Reef	1	228.417
2018-08-16 11:00:00	13.461	0	Scotland	1	Danger Reef	1	228.458
2018-08-16 12:00:00	13.365	0	Scotland	1	Danger Reef	1	228.5
2018-08-16 13:00:00	13.461	0	Scotland	1	Danger Reef	1	228.542
2018-08-16 14:00:00	13.461	0	Scotland	1	Danger Reef	1	228.583
2018-08-16 15:00:00	13.461	32.3	Scotland	1	Danger Reef	1	228.625
2018-08-16 16:00:00	13.461	10.8	Scotland	1	Danger Reef	1	228.667
2018-08-16 17:00:00	13.461	10.8	Scotland	1	Danger Reef	1	228.708
2018-08-16 18:00:00	13.461	10.8	Scotland	1	Danger Reef	1	228.75
2018-08-16 19:00:00	13.461	430.6	Scotland	1	Danger Reef	1	228.792
2018-08-16 20:00:00	13.365	75.3	Scotland	1	Danger Reef	1	228.833
2018-08-16 21:00:00	13.365	355.2	Scotland	1	Danger Reef	1	228.875
2018-08-16 22:00:00	13.558	258.3	Scotland	1	Danger Reef	1	228.917
2018-08-16 23:00:00	13.461	64.6	Scotland	1	Danger Reef	1	228.958
2018-08-17	13.461	53.8	Scotland	1	Danger Reef	1	229
2018-08-17 01:00:00	13.461	21.5	Scotland	1	Danger Reef	1	229.042
2018-08-17 02:00:00	13.558	0	Scotland	1	Danger Reef	1	229.083
2018-08-17 03:00:00	13.461	0	Scotland	1	Danger Reef	1	229.125
2018-08-17 04:00:00	13.461	0	Scotland	1	Danger Reef	1	229.167
2018-08-17 05:00:00	13.461	0	Scotland	1	Danger Reef	1	229.208
2018-08-17 06:00:00	13.461	0	Scotland	1	Danger Reef	1	229.25
2018-08-17 07:00:00	13.461	0	Scotland	1	Danger Reef	1	229.292
2018-08-17 08:00:00	13.461	0	Scotland	1	Danger Reef	1	229.333
2018-08-17 09:00:00	13.461	0	Scotland	1	Danger Reef	1	229.375
2018-08-17 10:00:00	13.461	0	Scotland	1	Danger Reef	1	229.417
2018-08-17 11:00:00	13.461	0	Scotland	1	Danger Reef	1	229.458
2018-08-17 12:00:00	13.461	0	Scotland	1	Danger Reef	1	229.5
2018-08-17 13:00:00	13.461	0	Scotland	1	Danger Reef	1	229.542
2018-08-17 14:00:00	13.461	0	Scotland	1	Danger Reef	1	229.583
2018-08-17 15:00:00	13.558	0	Scotland	1	Danger Reef	1	229.625
2018-08-17 16:00:00	13.461	0	Scotland	1	Danger Reef	1	229.667
2018-08-17 17:00:00	13.461	10.8	Scotland	1	Danger Reef	1	229.708
2018-08-17 18:00:00	13.461	21.5	Scotland	1	Danger Reef	1	229.75
2018-08-17 19:00:00	13.461	21.5	Scotland	1	Danger Reef	1	229.792
2018-08-17 20:00:00	13.461	0	Scotland	1	Danger Reef	1	229.833
2018-08-17 21:00:00	13.461	0	Scotland	1	Danger Reef	1	229.875
2018-08-17 22:00:00	13.461	21.5	Scotland	1	Danger Reef	1	229.917
2018-08-17 23:00:00	13.461	21.5	Scotland	1	Danger Reef	1	229.958
2018-08-18	13.461	43.1	Scotland	1	Danger Reef	1	230
2018-08-18 01:00:00	13.461	0	Scotland	1	Danger Reef	1	230.042
2018-08-18 02:00:00	13.461	0	Scotland	1	Danger Reef	1	230.083
2018-08-18 03:00:00	13.558	0	Scotland	1	Danger Reef	1	230.125
[truncated: 23,925 more rows]

## Sheet: Data B
Region	Species	Site	retrieval	ID	Partner.name	Lat	Lon	Cage.Label	Bag.label	WW..g..pre	Date.deployed	WW.retrieval.1	Date.retreived	Days	WW.change	MeanTemperature	MaxTemperature	minTemperature	MeanLight	SDLight	WW loss (%)	WWperday	k	Temp.range	g3	X	Y	Z	Latitude	CtoN	Nitrogen percent	Carbon percent	C13	N15	Exposure
Portugal	L. hyperborea	2	1	411	Franco	41.1763	-8.70268	185	202	18.86	14.06.2018	0	16.07.2018	32	18.86	15.0274	19.472	12.883	144.673	341.692	-100	3.125	-0.0933971	6.589	0.990484	0.64807	-0.690322	0.00530098	41.2	14.8155	2.10985	31.007	-16.1325	5.1475	1.34369
Portugal	L. hyperborea	1	1	395	Franco	41.1774	-8.70542	181	194	17.25	14.06.2018	0	16.07.2018	32	17.25	14.9775	20.234	12.787	698.024	1163.97	-100	3.125	-0.0907552	7.447	1.02462	-0.435443	0.467744	0.257112	41.2	14.8155	2.10985	31.007	-16.1325	5.1475	1.1603
Portugal	L. hyperborea	1	2	400	Franco	41.1774	-8.70542	184	195	17.88	14.06.2018	0	13.09.2018	33	17.88	13.9696	18.236	13.173	260.804	508.36	-100	3.0303	-0.0322868	5.063	1.02462	-0.435443	0.467744	0.257112	41.2	14.8155	2.10985	31.007	-16.1325	5.1475	1.1603
Portugal	L. hyperborea	2	1	413	Franco	41.1763	-8.70268	187	208	24.73	14.06.2018	0	16.07.2018	32	24.73	15.0274	19.472	12.883	144.673	341.692	-100	3.125	-0.101489	6.589	0.990484	0.64807	-0.690322	0.00530098	41.2	14.8155	2.10985	31.007	-16.1325	5.1475	1.34369
Portugal	L. hyperborea	2	2	420	Franco	41.1763	-8.70268	187	207	18.79	14.06.2018	0	13.09.2018	33	18.79	14.0262	16.427	13.269	164.472	398.962	-100	3.0303	-0.0328041	3.158	1.03068	0.24228	-0.263085	-0.907631	41.2	14.8155	2.10985	31.007	-16.1325	5.1475	1.413
Portugal	L. hyperborea	2	1	414	Franco	41.1763	-8.70268	186	205	19.75	14.06.2018	0	16.07.2018	32	19.75	15.0274	19.472	12.883	144.673	341.692	-100	3.125	-0.0947671	6.589	0.990484	0.64807	-0.690322	0.00530098	41.2	14.8155	2.10985	31.007	-16.1325	5.1475	1.34369
Portugal	L. hyperborea	2	2	416	Franco	41.1763	-8.70268	186	206	21.49	14.06.2018	0	13.09.2018	33	21.49	14.0262	16.427	13.269	164.472	398.962	-100	3.0303	-0.0342096	3.158	1.03068	0.24228	-0.263085	-0.907631	41.2	14.8155	2.10985	31.007	-16.1325	5.1475	1.413
Portugal	L. hyperborea	1	2	406	Franco	41.1774	-8.70542	182	197	22.44	14.06.2018	0	13.09.2018	33	22.44	13.9696	18.236	13.173	260.804	508.36	-100	3.0303	-0.0346642	5.063	1.02462	-0.435443	0.467744	0.257112	41.2	14.8155	2.10985	31.007	-16.1325	5.1475	1.1603
Portugal	L. hyperborea	2	1	407	Franco	41.1763	-8.70268	188	204	21.34	14.06.2018	0	16.07.2018	32	21.34	15.0274	19.472	12.883	144.673	341.692	-100	3.125	-0.0970743	6.589	0.990484	0.64807	-0.690322	0.00530098	41.2	14.8155	2.10985	31.007	-16.1325	5.1475	1.34369
Portugal	L. hyperborea	3	1	426	Franco	41.1771	-8.70028	191	214	18.02	14.06.2018	0	16.07.2018	32	18.02	14.9835	19.377	12.883	525.479	887.286	-100	3.125	-0.0920466	6.494	1.03496	0.103686	-0.0166018	0.703303	41.2	14.8155	2.10985	31.007	-16.1325	5.1475	0.823591
Portugal	L. hyperborea	2	2	422	Franco	41.1763	-8.70268	185	201	22.21	14.06.2018	0	13.09.2018	33	22.21	14.0262	16.427	13.269	164.472	398.962	-100	3.0303	-0.0345559	3.158	1.03068	0.24228	-0.263085	-0.907631	41.2	14.8155	2.10985	31.007	-16.1325	5.1475	1.413
Portugal	L. hyperborea	1	2	402	Franco	41.1774	-8.70542	183	199	21.96	14.06.2018	0	13.09.2018	33	21.96	13.9696	18.236	13.173	260.804	508.36	-100	3.0303	-0.0344369	5.063	1.02462	-0.435443	0.467744	0.257112	41.2	14.8155	2.10985	31.007	-16.1325	5.1475	1.1603
Portugal	L. hyperborea	3	1	429	Franco	41.1771	-8.70028	189	211	20.37	14.06.2018	0	16.07.2018	32	20.37	14.9835	19.377	12.883	525.479	887.286	-100	3.125	-0.0956871	6.494	1.03496	0.103686	-0.0166018	0.703303	41.2	14.8155	2.10985	31.007	-16.1325	5.1475	0.823591
Portugal	L. hyperborea	2	2	418	Franco	41.1763	-8.70268	188	203	17.47	14.06.2018	0	13.09.2018	33	17.47	14.0262	16.427	13.269	164.472	398.962	-100	3.0303	-0.0320456	3.158	1.03068	0.24228	-0.263085	-0.907631	41.2	14.8155	2.10985	31.007	-16.1325	5.1475	1.413
Portugal	L. hyperborea	3	1	427	Franco	41.1771	-8.70028	190	216	22.81	14.06.2018	0	16.07.2018	32	22.81	14.9835	19.377	12.883	525.479	887.286	-100	3.125	-0.0990658	6.494	1.03496	0.103686	-0.0166018	0.703303	41.2	14.8155	2.10985	31.007	-16.1325	5.1475	0.823591
Portugal	L. hyperborea	3	2	431	Franco	41.1771	-8.70028	191	213	18.35	14.06.2018	0	13.09.2018	33	18.35	13.9728	16.427	13.269	49.3039	155.554	-100	3.0303	-0.0325571	3.158	1.03881	0.0711019	-0.397401	0.260247	41.2	14.8155	2.10985	31.007	-16.1325	5.1475	0.72875
Portugal	L. hyperborea	3	2	437	Franco	41.1771	-8.70028	192	209	17.58	14.06.2018	0	13.09.2018	33	17.58	13.9728	16.427	13.269	49.3039	155.554	-100	3.0303	-0.0321108	3.158	1.03881	0.0711019	-0.397401	0.260247	41.2	14.8155	2.10985	31.007	-16.1325	5.1475	0.72875
Portugal	L. hyperborea	1	1	398	Franco	41.1774	-8.70542	183	200	22.26	14.06.2018	0	16.07.2018	32	22.26	14.9775	20.234	12.787	698.024	1163.97	-100	3.125	-0.0983355	7.447	1.02462	-0.435443	0.467744	0.257112	41.2	14.8155	2.10985	31.007	-16.1325	5.1475	1.1603
Portugal	L. hyperborea	1	1	394	Franco	41.1774	-8.70542	184	196	21.74	14.06.2018	0	16.07.2018	32	21.74	14.9775	20.234	12.787	698.024	1163.97	-100	3.125	-0.0976289	7.447	1.02462	-0.435443	0.467744	0.257112	41.2	14.8155	2.10985	31.007	-16.1325	5.1475	1.1603
Portugal	L. hyperborea	3	2	435	Franco	41.1771	-8.70028	189	212	25.49	14.06.2018	0	13.09.2018	33	25.49	13.9728	16.427	13.269	49.3039	155.554	-100	3.0303	-0.0360084	3.158	1.03881	0.0711019	-0.397401	0.260247	41.2	14.8155	2.10985	31.007	-16.1325	5.1475	0.72875
Portugal	L. hyperborea	3	1	424	Franco	41.1771	-8.70028	192	210	22.73	14.06.2018	0	16.07.2018	32	22.73	14.9835	19.377	12.883	525.479	887.286	-100	3.125	-0.0989606	6.494	1.03496	0.103686	-0.0166018	0.703303	41.2	14.8155	2.10985	31.007	-16.1325	5.1475	0.823591
Portugal	L. hyperborea	1	1	393	Franco	41.1774	-8.70542	182	198	19.12	14.06.2018	0	16.07.2018	32	19.12	14.9775	20.234	12.787	698.024	1163.97	-100	3.125	-0.0938036	7.447	1.02462	-0.435443	0.467744	0.257112	41.2	14.8155	2.10985	31.007	-16.1325	5.1475	1.1603
Portugal	L. hyperborea	3	2	436	Franco	41.1771	-8.70028	190	215	18.61	14.06.2018	0	13.09.2018	33	18.61	13.9728	16.427	13.269	49.3039	155.554	-100	3.0303	-0.0327037	3.158	1.03881	0.0711019	-0.397401	0.260247	41.2	14.8155	2.10985	31.007	-16.1325	5.1475	0.72875
Portugal	L. hyperborea	1	2	401	Franco	41.1774	-8.70542	181	193	23.01	14.06.2018	0	13.09.2018	33	23.01	13.9696	18.236	13.173	260.804	508.36	-100	3.0303	-0.0349282	5.063	1.02462	-0.435443	0.467744	0.257112	41.2	14.8155	2.10985	31.007	-16.1325	5.1475	1.1603
Portugal	S. latissima	1	1	391	Franco	41.1774	-8.70542	181	217	20.23	14.06.2018	11.56	16.07.2018	32	8.67	14.9775	20.234	12.787	698.024	1163.97	-42.8571	1.33929	-0.0164031	7.447	1.02462	-0.435443	0.467744	0.257112	41.2	20.6903	1.57939	31.3359	-14.1675	6.0525	1.1603
Portugal	S. latissima	1	1	397	Franco	41.1774	-8.70542	183	224	22.91	14.06.2018	0.42	16.07.2018	32	22.49	14.9775	20.234	12.787	698.024	1163.97	-98.1667	3.06771	-0.0882387	7.447	1.02462	-0.435443	0.467744	0.257112	41.2	20.6903	1.57939	31.3359	-14.1675	6.0525	1.1603
Portugal	S. latissima	3	2	438	Franco	41.1771	-8.70028	191	238	20.96	14.06.2018	0	13.09.2018	33	20.96	13.9728	16.427	13.269	49.3039	155.554	-100	3.0303	-0.0339475	3.158	1.03881	0.0711019	-0.397401	0.260247	41.2	20.6903	1.57939	31.3359	-14.1675	6.0525	0.72875
Portugal	S. latissima	2	2	421	Franco	41.1763	-8.70268	186	229	22.45	14.06.2018	0	13.09.2018	60	22.45	14.0262	16.427	13.269	164.472	398.962	-100	1.66667	-0.0346689	3.158	1.03068	0.24228	-0.263085	-0.907631	41.2	20.6903	1.57939	31.3359	-14.1675	6.0525	1.413
Portugal	S. latissima	1	1	392	Franco	41.1774	-8.70542	182	221	19.85	14.06.2018	17.49	16.07.2018	32	2.36	14.9775	20.234	12.787	698.024	1163.97	-11.8892	0.371537	-0.00375387	7.447	1.02462	-0.435443	0.467744	0.257112	41.2	20.6903	1.57939	31.3359	-14.1675	6.0525	1.1603
Portugal	S. latissima	3	2	433	Franco	41.1771	-8.70028	192	234	19.77	14.06.2018	0	13.09.2018	33	19.77	13.9728	16.427	13.269	49.3039	155.554	-100	3.0303	-0.0333353	3.158	1.03881	0.0711019	-0.397401	0.260247	41.2	20.6903	1.57939	31.3359	-14.1675	6.0525	0.72875
Portugal	S. latissima	3	2	434	Franco	41.1771	-8.70028	190	240	18.76	14.06.2018	0	13.09.2018	33	18.76	13.9728	16.427	13.269	49.3039	155.554	-100	3.0303	-0.0327875	3.158	1.03881	0.0711019	-0.397401	0.260247	41.2	20.6903	1.57939	31.3359	-14.1675	6.0525	0.72875
Portugal	S. latissima	1	2	399	Franco	41.1774	-8.70542	184	220	21.67	14.06.2018	0	13.09.2018	60	21.67	13.9696	18.236	13.173	260.804	508.36	-100	1.66667	-0.0342972	5.063	1.02462	-0.435443	0.467744	0.257112	41.2	20.6903	1.57939	31.3359	-14.1675	6.0525	1.1603
Portugal	S. latissima	2	1	409	Franco	41.1763	-8.70268	187	231	23.73	14.06.2018	0	16.07.2018	32	23.73	15.0274	19.472	12.883	144.673	341.692	-100	3.125	-0.100251	6.589	0.990484	0.64807	-0.690322	0.00530098	41.2	20.6903	1.57939	31.3359	-14.1675	6.0525	1.34369
Portugal	S. latissima	2	1	410	Franco	41.1763	-8.70268	188	228	21.17	14.06.2018	14.01	16.07.2018	32	7.16	15.0274	19.472	12.883	144.673	341.692	-33.8214	1.05692	-0.0121882	6.589	0.990484	0.64807	-0.690322	0.00530098	41.2	20.6903	1.57939	31.3359	-14.1675	6.0525	1.34369
Portugal	S. latissima	1	1	396	Franco	41.1774	-8.70542	184	219	22.94	14.06.2018	15.5	16.07.2018	32	7.44	14.9775	20.234	12.787	698.024	1163.97	-32.4324	1.01351	-0.0116309	7.447	1.02462	-0.435443	0.467744	0.257112	41.2	20.6903	1.57939	31.3359	-14.1675	6.0525	1.1603
Portugal	S. latissima	1	2	404	Franco	41.1774	-8.70542	183	223	19.57	14.06.2018	0	13.09.2018	60	19.57	13.9696	18.236	13.173	260.804	508.36	-100	1.66667	-0.0332289	5.063	1.02462	-0.435443	0.467744	0.257112	41.2	20.6903	1.57939	31.3359	-14.1675	6.0525	1.1603
Portugal	S. latissima	2	2	415	Franco	41.1763	-8.70268	188	227	24.49	14.06.2018	0	13.09.2018	60	24.49	14.0262	16.427	13.269	164.472	398.962	-100	1.66667	-0.0355856	3.158	1.03068	0.24228	-0.263085	-0.907631	41.2	20.6903	1.57939	31.3359	-14.1675	6.0525	1.413
Portugal	S. latissima	1	2	405	Franco	41.1774	-8.70542	182	222	21.27	14.06.2018	0	13.09.2018	60	21.27	13.9696	18.236	13.173	260.804	508.36	-100	1.66667	-0.0341015	5.063	1.02462	-0.435443	0.467744	0.257112	41.2	20.6903	1.57939	31.3359	-14.1675	6.0525	1.1603
Portugal	S. latissima	2	2	419	Franco	41.1763	-8.70268	185	226	23.13	14.06.2018	0	13.09.2018	60	23.13	14.0262	16.427	13.269	164.472	398.962	-100	1.66667	-0.034983	3.158	1.03068	0.24228	-0.263085	-0.907631	41.2	20.6903	1.57939	31.3359	-14.1675	6.0525	1.413
Portugal	S. latissima	3	1	425	Franco	41.1771	-8.70028	191	237	18.67	14.06.2018	1.54	16.07.2018	32	17.13	14.9835	19.377	12.883	525.479	887.286	-91.7515	2.86723	-0.0639666	6.494	1.03496	0.103686	-0.0166018	0.703303	41.2	20.6903	1.57939	31.3359	-14.1675	6.0525	0.823591
Portugal	S. latissima	2	1	408	Franco	41.1763	-8.70268	186	230	23.11	14.06.2018	7.6	16.07.2018	32	15.51	15.0274	19.472	12.883	144.673	341.692	-67.1138	2.09731	-0.0322145	6.589	0.990484	0.64807	-0.690322	0.00530098	41.2	20.6903	1.57939	31.3359	-14.1675	6.0525	1.34369
Portugal	S. latissima	3	1	423	Franco	41.1771	-8.70028	190	239	19.01	14.06.2018	0	16.07.2018	32	19.01	14.9835	19.377	12.883	525.479	887.286	-100	3.125	-0.0936323	6.494	1.03496	0.103686	-0.0166018	0.703303	41.2	20.6903	1.57939	31.3359	-14.1675	6.0525	0.823591
Portugal	S. latissima	2	1	412	Franco	41.1763	-8.70268	185	225	21.04	14.06.2018	0	16.07.2018	32	21.04	15.0274	19.472	12.883	144.673	341.692	-100	3.125	-0.0966518	6.589	0.990484	0.64807	-0.690322	0.00530098	41.2	20.6903	1.57939	31.3359	-14.1675	6.0525	1.34369
Portugal	S. latissima	2	2	417	Franco	41.1763	-8.70268	187	232	21.86	14.06.2018	0	13.09.2018	60	21.86	14.0262	16.427	13.269	164.472	398.962	-100	1.66667	-0.0343889	3.158	1.03068	0.24228	-0.263085	-0.907631	41.2	20.6903	1.57939	31.3359	-14.1675	6.0525	1.413
Portugal	S. latissima	3	1	430	Franco	41.1771	-8.70028	192	233	21.42	14.06.2018	0	16.07.2018	32	21.42	14.9835	19.377	12.883	525.479	887.286	-100	3.125	-0.097186	6.494	1.03496	0.103686	-0.0166018	0.703303	41.2	20.6903	1.57939	31.3359	-14.1675	6.0525	0.823591
Portugal	S. latissima	3	1	428	Franco	41.1771	-8.70028	189	235	18.94	14.06.2018	1.72	16.07.2018	32	17.22	14.9835	19.377	12.883	525.479	887.286	-90.9187	2.84121	-0.062253	6.494	1.03496	0.103686	-0.0166018	0.703303	41.2	20.6903	1.57939	31.3359	-14.1675	6.0525	0.823591
Portugal	S. latissima	3	2	432	Franco	41.1771	-8.70028	189	236	18.94	14.06.2018	0	13.09.2018	33	18.94	13.9728	16.427	13.269	49.3039	155.554	-100	3.0303	-0.0328871	3.158	1.03881	0.0711019	-0.397401	0.260247	41.2	20.6903	1.57939	31.3359	-14.1675	6.0525	0.72875
Portugal	S. latissima	1	2	403	Franco	41.1774	-8.70542	181	218	19.46	14.06.2018	0	13.09.2018	60	19.46	13.9696	18.236	13.173	260.804	508.36	-100	1.66667	-0.03317	5.063	1.02462	-0.435443	0.467744	0.257112	41.2	20.6903	1.57939	31.3359	-14.1675	6.0525	1.1603
Rhode I	S. latissima	ft_wetherill	1	442	Feehan	41.4773	-71.3928		796	19.42	07.09.2018	0.03	26.10.2018	49	19.39	19.1648	21.664	13.942	2.2119	7.90968	-99.8455	2.03766	-0.0609583	7.722	1.04076	0.5636	-0.839791	-0.140131	41.5	20.2384	1.95725	38.3474	-15.4087	9.11	1.54352
Rhode I	S. latissima	ft_wetherill	1	443	Feehan	41.4773	-71.3928		840	30.15	07.09.2018	0	26.10.2018	49	30.15	19.1648	21.664	13.942	2.2119	7.90968	-100	2.04082	-0.0701799	7.722	1.04076	0.5636	-0.839791	-0.140131	41.5	20.2384	1.95725	38.3474	-15.4087	9.11	1.54352
Rhode I	S. latissima	ft_wetherill	1	445	Feehan	41.4773	-71.3928		811	18.04	07.09.2018	0	26.10.2018	49	18.04	19.1648	21.664	13.942	2.2119	7.90968	-100	2.04082	-0.0601335	7.722	1.04076	0.5636	-0.839791	-0.140131	41.5	20.2384	1.95725	38.3474	-15.4087	9.11	1.54352
Rhode I	S. latissima	ft_wetherill	1	446	Feehan	41.4773	-71.3928		814	29.11	07.09.2018	0	26.10.2018	49	29.11	19.1648	21.664	13.942	2.2119	7.90968	-100	2.04082	-0.0694869	7.722	1.04076	0.5636	-0.839791	-0.140131	41.5	20.2384	1.95725	38.3474	-15.4087	9.11	1.54352
Rhode I	S. latissima	ft_wetherill	2	447	Feehan	41.4773	-71.3928			20	07.09.2018	0	30.11.2018	50	20	18.8687	21.664	13.365	2.2119	0	-100	2	-0.0362443	0.577	1.02233	-0.536861	0.772833	0.249921	41.5	20.2384	1.95725	38.3474	-15.4087	9.11	1.55962
Rhode I	S. latissima	ft_wetherill	2	448	Feehan	41.4773	-71.3928			20	07.09.2018	0	30.11.2018	50	20	18.8687	21.664	13.365	2.2119	0	-100	2	-0.0362443	0.577	1.02233	-0.536861	0.772833	0.249921	41.5	20.2384	1.95725	38.3474	-15.4087	9.11	1.55962
Rhode I	S. latissima	kings_beach	1	453	Feehan	41.4529	-71.3446		829	31.86	07.09.2018	2.67	26.10.2018	49	29.19	19.1648	21.664	13.942	2.2119		-91.6196	1.86979	-0.044736	7.722	1.04076	0.5636	-0.839791	-0.140131	41.5	20.2384	1.95725	38.3474	-15.4087	9.11	1.54352
Rhode I	S. latissima	kings_beach	1	454	Feehan	41.4529	-71.3446		834	26.23	07.09.2018	3.9	26.10.2018	49	22.33	19.1648	21.664	13.942	2.2119		-85.1315	1.73738	-0.0350017	7.722	1.04076	0.5636	-0.839791	-0.140131	41.5	20.2384	1.95725	38.3474	-15.4087	9.11	1.54352
Rhode I	S. latissima	kings_beach	1	455	Feehan	41.4529	-71.3446		801	38.49	07.09.2018	3.41	26.10.2018	49	35.08	19.1648	21.664	13.942	2.2119		-91.1406	1.86001	-0.0447382	7.722	1.04076	0.5636	-0.839791	-0.140131	41.5	20.2384	1.95725	38.3474	-15.4087	9.11	1.54352
Rhode I	S. latissima	kings_beach	1	456	Feehan	41.4529	-71.3446		835	24.12	07.09.2018	0	26.10.2018	49	24.12	19.1648	21.664	13.942	2.2119		-100	2.04082	-0.0657891	7.722	1.04076	0.5636	-0.839791	-0.140131	41.5	20.2384	1.95725	38.3474	-15.4087	9.11	1.54352
Rhode I	S. latissima	kings_beach	1	450	Feehan	41.4529	-71.3446		818	23.21	07.09.2018	6.14	26.10.2018	49	17.07	19.1648	21.664	13.942	2.2119		-73.5459	1.50094	-0.0249194	7.722	1.04076	0.5636	-0.839791	-0.140131	41.5	20.2384	1.95725	38.3474	-15.4087	9.11	1.54352
Rhode I	S. latissima	kings_beach	2	457	Feehan	41.4529	-71.3446			20	07.09.2018	0	30.11.2018	84	20	18.8687	21.664	13.365	2.2119		-100	1.19048	-0.0362443	8.299	1.02233	-0.536861	0.772833	0.249921	41.5	20.2384	1.95725	38.3474	-15.4087	9.11	1.55962
Rhode I	S. latissima	kings_beach	2	458	Feehan	41.4529	-71.3446			20	07.09.2018	0	30.11.2018	84	20	18.8687	21.664	13.365	2.2119		-100	1.19048	-0.0362443	8.299	1.02233	-0.536861	0.772833	0.249921	41.5	20.2384	1.95725	38.3474	-15.4087	9.11	1.55962
Rhode I	S. latissima	ft_wetherill	1	444	Feehan	41.4773	-71.3928		838	27.79	07.09.2018	0	26.10.2018	49	27.79	19.1648	21.664	13.942	2.2119	7.90968	-100	2.04082	-0.068572	7.722	1.04076	0.5636	-0.839791	-0.140131	41.5	20.2384	1.95725	38.3474	-15.4087	9.11	1.54352
New England	S. latissima	Bakers Island 1	1	327	Byrnes	42.537	-70.7925	488	525	20	27.07.2018	10.65	20.09.2018	55	-9.35	21.04	24.9				-46.75	0.85	-0.010713	7					42.5	30.2107	1.2789	38.4484	-17.6663	5.01625
New England	S. latissima	Bakers Island 1	1	329	Byrnes	42.537	-70.7925	492	517	20	27.07.2018	0	20.09.2018	55	-20	21.04	24.9				-100	1.81818	-0.055355	7					42.5	30.2107	1.2789	38.4484	-17.6663	5.01625
New England	S. latissima	Bakers Island 1	1	330	Byrnes	42.537	-70.7925	492	527	20	27.07.2018	0	20.09.2018	55	-20	21.04	24.9				-100	1.81818	-0.055355	7					42.5	30.2107	1.2789	38.4484	-17.6663	5.01625
New England	S. latissima	Bakers Island 1	1	331	Byrnes	42.537	-70.7925	492	515	20	27.07.2018	0	20.09.2018	55	-20	21.04	24.9				-100	1.81818	-0.055355	7					42.5	30.2107	1.2789	38.4484	-17.6663	5.01625
New England	S. latissima	Bakers Island 1	1	328	Byrnes	42.537	-70.7925	488	508	20	27.07.2018	0.89	20.09.2018	55	-19.11	21.04	24.9				-95.55	1.73727	-0.0437808	7					42.5	30.2107	1.2789	38.4484	-17.6663	5.01625
New England	S. latissima	Bakers Island 1	1	333	Byrnes	42.537	-70.7925	492	507	20	27.07.2018	0	20.09.2018	55	-20	21.04	24.9				-100	1.81818	-0.055355	7					42.5	30.2107	1.2789	38.4484	-17.6663	5.01625
New England	S. latissima	Bakers Island 1	1	334	Byrnes	42.537	-70.7925	488	503	20	27.07.2018	17.08	20.09.2018	55	-2.92	21.04	24.9				-14.6	0.265455	-0.00272211	7					42.5	30.2107	1.2789	38.4484	-17.6663	5.01625
New England	S. latissima	Bakers Island 2	1	335	Byrnes	42.5341	-70.794	483	513	18	27.07.2018	0	20.09.2018	55	-18	21.04	24.9				-100	1.81818	-0.0535353	7					42.5	30.2107	1.2789	38.4484	-17.6663	5.01625
New England	S. latissima	Bakers Island 1	1	332	Byrnes	42.537	-70.7925	488	506	20	27.07.2018	12.18	20.09.2018	55	-7.82	21.04	24.9				-39.1	0.710909	-0.00846949	7					42.5	30.2107	1.2789	38.4484	-17.6663	5.01625
New England	S. latissima	Bakers Island 2	1	337	Byrnes	42.5341	-70.794	486	516	20	27.07.2018	0	20.09.2018	55	-20	21.04	24.9				-100	1.81818	-0.055355	7					42.5	30.2107	1.2789	38.4484	-17.6663	5.01625
New England	S. latissima	Bakers Island 2	1	338	Byrnes	42.5341	-70.794	486	526	20	27.07.2018	0	20.09.2018	55	-20	21.04	24.9				-100	1.81818	-0.055355	7					42.5	30.2107	1.2789	38.4484	-17.6663	5.01625
New England	S. latissima	Bakers Island 2	1	339	Byrnes	42.5341	-70.794	483	502	20	27.07.2018	13.6	20.09.2018	55	-6.4	21.04	24.9				-32	0.581818	-0.00660911	7					42.5	30.2107	1.2789	38.4484	-17.6663	5.01625
New England	S. latissima	Bakers Island 2	1	340	Byrnes	42.5341	-70.794	483	504	16.5	27.07.2018	5.32	20.09.2018	55	-11.18	21.04	24.9				-67.7576	1.23196	-0.0185178	7					42.5	30.2107	1.2789	38.4484	-17.6663	5.01625
New England	S. latissima	Bakers Island 2	1	341	Byrnes	42.5341	-70.794	483	519	20	27.07.2018	0.36	20.09.2018	55	-19.64	21.04	24.9				-98.2	1.78545	-0.0497643	7					42.5	30.2107	1.2789	38.4484	-17.6663	5.01625
New England	S. latissima	Bakers Island 2	1	342	Byrnes	42.5341	-70.794	486	501	20	27.07.2018	0	20.09.2018	55	-20	21.04	24.9				-100	1.81818	-0.055355	7					42.5	30.2107	1.2789	38.4484	-17.6663	5.01625
New England	S. latissima	Bakers Island 3	1	343	Byrnes	42.5355	-70.7944	491	505	20	27.07.2018	0	20.09.2018	55	-20	21.04	24.9				-100	1.81818	-0.055355	7					42.5	30.2107	1.2789	38.4484	-17.6663	5.01625
New England	S. latissima	Bakers Island 3	1	344	Byrnes	42.5355	-70.7944	491	534	20	27.07.2018	0	20.09.2018	55	-20	21.04	24.9				-100	1.81818	-0.055355	7					42.5	30.2107	1.2789	38.4484	-17.6663	5.01625
New England	S. latissima	Bakers Island 3	1	345	Byrnes	42.5355	-70.7944	491	530	20	27.07.2018	0	20.09.2018	55	-20	21.04	24.9				-100	1.81818	-0.055355	7					42.5	30.2107	1.2789	38.4484	-17.6663	5.01625
New England	S. latissima	Bakers Island 3	1	346	Byrnes	42.5355	-70.7944	491	531	20	27.07.2018	0	20.09.2018	55	-20	21.04	24.9				-100	1.81818	-0.055355	7					42.5	30.2107	1.2789	38.4484	-17.6663	5.01625
New England	S. latissima	Bakers Island 3	1	347	Byrnes	42.5355	-70.7944	484	493	20	03.08.2018	12	20.09.2018	48	-8	21.04	24.9				-40	0.833333	-0.00999111	7					42.5	30.2107	1.2789	38.4484	-17.6663	5.01625
New England	S. latissima	Bakers Island 3	1	348	Byrnes	42.5355	-70.7944	484	537	20	03.08.2018	17.97	20.09.2018	48	-2.03	21.04	24.9				-10.15	0.211458	-0.00211799	7					42.5	30.2107	1.2789	38.4484	-17.6663	5.01625
New England	S. latissima	Bakers Island 2	1	336	Byrnes	42.5341	-70.794	486	497	20	27.07.2018	0	20.09.2018	55	-20	21.04	24.9				-100	1.81818	-0.055355	7					42.5	30.2107	1.2789	38.4484	-17.6663	5.01625
New England	S. latissima	Bakers Island 3	1	350	Byrnes	42.5355	-70.7944	484	539	20	03.08.2018	22.7	20.09.2018	48	2.7	21.04	24.9				13.5	-0.28125	0.00251985	7					42.5	30.2107	1.2789	38.4484	-17.6663	5.01625
New England	S. latissima	Bakers Island 3	1	349	Byrnes	42.5355	-70.7944	484	500	20	03.08.2018	21.11	20.09.2018	48	1.11	21.04	24.9				5.55	-0.115625	0.00107307	7					42.5	30.2107	1.2789	38.4484	-17.6663	5.01625
Nova Scotia	S. latissima	Paddys Head	1	355	Krumhansl	44.5272	-63.9523		753	22.44	13.07.2018	21.955	02.09.2018	51	0.485						-2.16132	0.0423788	-0.000409964		0.995093	-0.306065	0.842838	-0.261617	44.5	88.6779	0.412213	34.8712	-15.3271	4.19	1.41052
Nova Scotia	S. latissima	Paddys Head	1	356	Krumhansl	44.5272	-63.9523		766	21.043	13.07.2018	19.605	02.09.2018	51	1.438						-6.83363	0.133993	-0.00132277		0.995093	-0.306065	0.842838	-0.261617	44.5	88.6779	0.412213	34.8712	-15.3271	4.19	1.41052
Nova Scotia	S. latissima	Paddys Head	1	357	Krumhansl	44.5272	-63.9523		743	17.871	13.07.2018	16.847	02.09.2018	51	1.024						-5.72995	0.112352	-0.00109394		0.995093	-0.306065	0.842838	-0.261617	44.5	88.6779	0.412213	34.8712	-15.3271	4.19	1.41052
Nova Scotia	S. latissima	Sandy Cove	2	374	Krumhansl	44.462	-63.7097		777	22.397	13.07.2018	21.176	07.10.2018	86	1.221	18.2192	21.473	10.846	681.797	2239.94	-5.45162	0.063391	-0.000623223	10.627	0.992857	0.521397	-0.833279	0.126626	44.5	88.6779	0.412213	34.8712	-15.3271	4.19	1.4813
Nova Scotia	S. latissima	Sandy Cove	1	360	Krumhansl	44.462	-63.7097		755	21.112	13.07.2018	20.21	31.08.2018	49	0.902	12.9334	19.377	7.983	899.464	2401.29	-4.27245	0.0871929	-0.000849953	11.394	1.00381	0.459523	-0.884212	0.117579	44.5	88.6779	0.412213	34.8712	-15.3271	4.19	1.46131
Nova Scotia	S. latissima	Sandy Cove	2	372	Krumhansl	44.462	-63.7097		750	22.209	13.07.2018	13.048	07.10.2018	86	9.161	18.2192	21.473	10.846	681.797	2239.94	-41.249	0.47964	-0.00583791	10.627	0.992857	0.521397	-0.833279	0.126626	44.5	88.6779	0.412213	34.8712	-15.3271	4.19	1.4813
Nova Scotia	S. latissima	Paddys Head	1	358	Krumhansl	44.5272	-63.9523		765	19.458	13.07.2018	15.754	02.09.2018	51	3.704						-19.0359	0.373252	-0.00391641		0.995093	-0.306065	0.842838	-0.261617	44.5	88.6779	0.412213	34.8712	-15.3271	4.19	1.41052
Nova Scotia	S. latissima	Sandy Cove	1	359	Krumhansl	44.462	-63.7097		763	21.847	13.07.2018	21.511	31.08.2018	49	0.336	12.9334	19.377	7.983	899.464	2401.29	-1.53797	0.0313871	-0.000302362	11.394	1.00381	0.459523	-0.884212	0.117579	44.5	88.6779	0.412213	34.8712	-15.3271	4.19	1.46131
Nova Scotia	S. latissima	Sandy Cove	1	364	Krumhansl	44.462	-63.7097		779	22.158	13.07.2018	21.682	31.08.2018	49	0.476	12.9334	19.377	7.983	899.464	2401.29	-2.14821	0.043841	-0.00042385	11.394	1.00381	0.459523	-0.884212	0.117579	44.5	88.6779	0.412213	34.8712	-15.3271	4.19	1.46131
Nova Scotia	S. latissima	Sandy Cove	2	369	Krumhansl	44.462	-63.7097		776	21.097	13.07.2018	10.599	07.10.2018	86	10.498	18.2192	21.473	10.846	681.797	2239.94	-49.7606	0.578612	-0.00749445	10.627	0.992857	0.521397	-0.833279	0.126626	44.5	88.6779	0.412213	34.8712	-15.3271	4.19	1.4813
Nova Scotia	S. latissima	Sandy Cove	1	363	Krumhansl	44.462	-63.7097		772	20.243	13.07.2018	18.555	31.08.2018	49	1.688	12.9334	19.377	7.983	899.464	2401.29	-8.33868	0.170177	-0.00168972	11.394	1.00381	0.459523	-0.884212	0.117579	44.5	88.6779	0.412213	34.8712	-15.3271	4.19	1.46131
Nova Scotia	S. latissima	The Lodge	1	381	Krumhansl	44.5563	-64.067		737	18.572	13.07.2018	17.08	02.09.2018	51	1.492	10.7753	23.966	5.347	261.715	835.274	-8.0336	0.157522	-0.00155478	18.619	1.0004	0.751958	0.407232	0.518661	44.5	88.6779	0.412213	34.8712	-15.3271	4.19	1.67785
Nova Scotia	S. latissima	The Lodge	2	387	Krumhansl	44.5563	-64.067		773	21.9	13.07.2018	7.114	10.10.2018	89	14.786	17.0438	20.424	9.472		779.021	-67.516	0.758607	-0.0116578	10.952	0.982337	0.753536	0.435866	0.453153	44.5	88.6779	0.412213	34.8712	-15.3271	4.19	1.64255
Nova Scotia	S. latissima	Sandy Cove	2	370	Krumhansl	44.462	-63.7097		747	22.64	13.07.2018	21.464	07.10.2018	86	1.176	18.2192	21.473	10.846	681.797	2239.94	-5.19435	0.0603994	-0.000593327	10.627	0.992857	0.521397	-0.833279	0.126626	44.5	88.6779	0.412213	34.8712	-15.3271	4.19	1.4813
Nova Scotia	S. latissima	The Lodge	2	386	Krumhansl	44.5563	-64.067		757	19.875	13.07.2018	18.699	10.10.2018	89	1.176	17.0438	20.424	9.472		779.021	-5.91698	0.0664829	-0.00065151	10.952	0.982337	0.753536	0.435866	0.453153	44.5	88.6779	0.412213	34.8712	-15.3271	4.19	1.64255
Nova Scotia	S. latissima	The Lodge	2	390	Krumhansl	44.5563	-64.067		738	20.17	13.07.2018	15.884	10.10.2018	89	4.286	17.0438	20.424	9.472		779.021	-21.2494	0.238757	-0.00254178	10.952	0.982337	0.753536	0.435866	0.453153	44.5	88.6779	0.412213	34.8712	-15.3271	4.19	1.64255
Nova Scotia	S. latissima	The Lodge	1	377	Krumhansl	44.5563	-64.067		739	22.235	13.07.2018	21.031	02.09.2018	51	1.204	10.7753	23.966	5.347	261.715	835.274	-5.41489	0.106174	-0.00104332	18.619	1.0004	0.751958	0.407232	0.518661	44.5	88.6779	0.412213	34.8712	-15.3271	4.19	1.67785
Nova Scotia	S. latissima	The Lodge	1	378	Krumhansl	44.5563	-64.067		752	19.843	13.07.2018	16.881	02.09.2018	51	2.962	10.7753	23.966	5.347	261.715	835.274	-14.9272	0.29269	-0.00300548	18.619	1.0004	0.751958	0.407232	0.518661	44.5	88.6779	0.412213	34.8712	-15.3271	4.19	1.67785
Nova Scotia	S. latissima	The Lodge	1	380	Krumhansl	44.5563	-64.067		762	21.082	13.07.2018	19.918	02.09.2018	51	1.164	10.7753	23.966	5.347	261.715	835.274	-5.5213	0.108261	-0.00106182	18.619	1.0004	0.751958	0.407232	0.518661	44.5	88.6779	0.412213	34.8712	-15.3271	4.19	1.67785
Nova Scotia	S. latissima	The Lodge	2	389	Krumhansl	44.5563	-64.067		745	21.334	13.07.2018	14.235	10.10.2018	89	7.099	17.0438	20.424	9.472		779.021	-33.2755	0.373882	-0.00429792	10.952	0.982337	0.753536	0.435866	0.453153	44.5	88.6779	0.412213	34.8712	-15.3271	4.19	1.64255
St Lawrence	S. latissima	Site 1	1	461	Johnson	47.7	-70.4	122	138	25	05.07.2018	24	09.08.2018	35	1	6.26135	17.95	2.195	38.5066	7.47373	-4	0.114286	-0.00112059	15.755					47.7	24.7752	1.49516	36.0801	-15.0563	5.71375
St Lawrence	S. latissima	Site 1	1	470	Johnson	47.7	-70.4	123	133	23	05.07.2018	12	09.08.2018	35	11	6.26135	17.95	2.195	38.5066	7.47373	-47.8261	1.36646	-0.0175173	15.755					47.7	24.7752	1.49516	36.0801	-15.0563	5.71375
St Lawrence	S. latissima	Site 1	1	463	Johnson	47.7	-70.4	124	135	23	05.07.2018	2	09.08.2018	35	21	6.26135	17.95	2.195	38.5066	7.47373	-91.3043	2.6087	-0.0594126	15.755					47.7	24.7752	1.49516	36.0801	-15.0563	5.71375
St Lawrence	S. latissima	Site 1	1	460	Johnson	47.7	-70.4	121	140	23	05.07.2018	21	09.08.2018	35	2	6.26135	17.95	2.195	38.5066	7.47373	-8.69565	0.248447	-0.00248604	15.755					47.7	24.7752	1.49516	36.0801	-15.0563	5.71375
St Lawrence	S. latissima	Site 2	2	476	Johnson	47.7	-70.4	127	144	21	05.07.2018	0	15.10.2018	102	21	7.13714	16.6	3.99	37.7566		-100	0.980392	-0.0303043	12.61					47.7	24.7752	1.49516	36.0801	-15.0563	5.71375
St Lawrence	S. latissima	Site 3	1	481	Johnson	47.7	-70.4	130	153	21	05.07.2018	10	09.08.2018	35	11	6.26135	17.9	2.19	37.7566		-52.381	1.4966	-0.0198042	15.71					47.7	24.7752	1.49516	36.0801	-15.0563	5.71375
St Lawrence	S. latissima	Site 1	1	471	Johnson	47.7	-70.4	123	134	20	05.07.2018	13	09.08.2018	35	7	6.26135	17.95	2.195	38.5066	7.47373	-35	1	-0.0115847	15.755					47.7	24.7752	1.49516	36.0801	-15.0563	5.71375
St Lawrence	S. latissima	Site 1	1	459	Johnson	47.7	-70.4	121	139	23	05.07.2018	14	09.08.2018	35	9	6.26135	17.95	2.195	38.5066	7.47373	-39.1304	1.11801	-0.0134287	15.755					47.7	24.7752	1.49516	36.0801	-15.0563	5.71375
St Lawrence	S. latissima	Site 2	2	480	Johnson	47.7	-70.4	127	143	20	05.07.2018	17	15.10.2018	102	3	7.13714	16.6	3.99	37.7566		-15	0.147059	-0.00151128	12.61					47.7	24.7752	1.49516	36.0801	-15.0563	5.71375
St Lawrence	S. latissima	Site 1	1	465	Johnson	47.7	-70.4	122	137	23	05.07.2018	0	09.08.2018	35	23	6.26135	17.95	2.195	38.5066	7.47373	-100	2.85714	-0.0908015	15.755					47.7	24.7752	1.49516	36.0801	-15.0563	5.71375
St Lawrence	S. latissima	Site 3	1	482	Johnson	47.7	-70.4	130	154	22	05.07.2018	12	09.08.2018	35	10	6.26135	17.9	2.19	37.7566		-45.4545	1.2987	-0.0163013	15.71					47.7	24.7752	1.49516	36.0801	-15.0563	5.71375
St Lawrence	S. latissima	Site 3	1	483	Johnson	47.7	-70.4	129	156	25	05.07.2018	11	09.08.2018	35	14	6.26135	17.9	2.19	37.7566		-56	1.6	-0.0220911	15.71					47.7	24.7752	1.49516	36.0801	-15.0563	5.71375
St Lawrence	S. latissima	Site 1	1	464	Johnson	47.7	-70.4	124	136	22	05.07.2018	1	09.08.2018	35	21	6.26135	17.95	2.195	38.5066	7.47373	-95.4545	2.72727	-0.0697813	15.755					47.7	24.7752	1.49516	36.0801	-15.0563	5.71375
St Lawrence	S. latissima	Site 3	2	488	Johnson	47.7	-70.4	131	150	19	05.07.2018	0	15.10.2018	102	19	7.13714	16.6	3.99	37.7566		-100	0.980392	-0.0293699	12.61					47.7	24.7752	1.49516	36.0801	-15.0563	5.71375
St Lawrence	S. latissima	Site 3	2	489	Johnson	47.7	-70.4	131	151	19	05.07.2018	0	15.10.2018	102	19	7.13714	16.6	3.99	37.7566		-100	0.980392	-0.0293699	12.61					47.7	24.7752	1.49516	36.0801	-15.0563	5.71375
British Columbia	S. latissima	Portland	1	134	Augustine	48.7323	-123.376	367	403	22.08	22.07.2018	17.15	20.08.2018	29	4.93	13.1493	15.473	11.625	53.0217	207.711	-22.3279	0.769928	-0.00828606	3.848	1.00723	0.479224	0.213656	0.50297	48.7	14.1757	2.56427	36.2608	-11.04	6.98875	1.19585
British Columbia	S. latissima	Portland	2	143	Augustine	48.7323	-123.376	368	392	17.14	22.07.2018	12.91	21.09.2018	61	4.23	12.9965	14.804	11.625	30.6914	79.2516	-24.6791	0.404576	-0.00435265	3.179	1.07751	-0.459675	-0.669355	-0.382864	48.7	14.1757	2.56427	36.2608	-11.04	6.98875	1.51189
British Columbia	S. latissima	Portland	2	146	Augustine	48.7323	-123.376	368	376	23.22	22.07.2018	18.41	21.09.2018	61	4.81	12.9965	14.804	11.625	30.6914	79.2516	-20.7149	0.339589	-0.00362935	3.179	1.07751	-0.459675	-0.669355	-0.382864	48.7	14.1757	2.56427	36.2608	-11.04	6.98875	1.51189
British Columbia	S. latissima	Fulford	2	133	Augustine	48.748	-123.433	365	405	19.13	22.07.2018	17.08	21.09.2018	61	2.05	12.8873	14.996	11.528	67.0205	162.862	-10.7162	0.175675	-0.00176074	3.468	1.01239	0.0897668	-0.336723	0.240982	48.7	14.1757	2.56427	36.2608	-11.04	6.98875	0.667472
British Columbia	S. latissima	Fulford	1	120	Augustine	48.748	-123.433	365	391	23.56	22.07.2018	23.97	20.08.2018	29	-0.41	12.9662	15.091	11.625	123.244	291.068	1.74024	-0.0600082	0.000570897	3.466	1.03506	-0.183969	-0.0312235	0.62553	48.7	14.1757	2.56427	36.2608	-11.04	6.98875	0.840723
British Columbia	S. latissima	Fulford	1	118	Augustine	48.748	-123.433	372	408	20.4	22.07.2018	20.12	20.08.2018	29	0.28	12.9662	15.091	11.625	123.244	291.068	-1.37255	0.0473293	-0.000454154	3.466	1.03506	-0.183969	-0.0312235	0.62553	48.7	14.1757	2.56427	36.2608	-11.04	6.98875	0.840723
British Columbia	S. latissima	Fulford	1	123	Augustine	48.748	-123.433	372	384	18.96	22.07.2018	18.09	20.08.2018	29	0.87	12.9662	15.091	11.625	123.244	291.068	-4.58861	0.158228	-0.00153675	3.466	1.03506	-0.183969	-0.0312235	0.62553	48.7	14.1757	2.56427	36.2608	-11.04	6.98875	0.840723
British Columbia	S. latissima	Portland	1	141	Augustine	48.7323	-123.376	368	409	22.73	22.07.2018	20.12	20.08.2018	29	2.61	13.1493	15.473	11.625	53.0217	207.711	-11.4826	0.395952	-0.00401792	3.848	1.00723	0.479224	0.213656	0.50297	48.7	14.1757	2.56427	36.2608	-11.04	6.98875	1.19585
British Columbia	S. latissima	Russell	2	162	Augustine	48.7505	-123.405	370	386	17.3	22.07.2018	0	21.09.2018	61	17.3	12.8586	14.804	11.528	71.9539	165.669	-100	1.63934	-0.0476541	3.276	1.07821	-0.563876	-0.615348	0.294989	48.7	14.1757	2.56427	36.2608	-11.04	6.98875	1.47421
British Columbia	S. latissima	Russell	1	151	Augustine	48.7505	-123.405	366	375	19.12	22.07.2018	18.07	20.08.2018	29	1.05	12.8988	14.804	11.625	50.2018	145.252	-5.49163	0.189367	-0.0018482	3.179	1.09508	-1.00099	-0.0432268	0.229478	48.7	14.1757	2.56427	36.2608	-11.04	6.98875	1.27369
British Columbia	S. latissima	Fulford	2	131	Augustine	48.748	-123.433	372	390	21.39	22.07.2018	20.04	21.09.2018	61	1.35	12.8873	14.996	11.528	67.0205	162.862	-6.31136	0.103465	-0.00101949	3.468	1.01239	0.0897668	-0.336723	0.240982	48.7	14.1757	2.56427	36.2608	-11.04	6.98875	0.667472
British Columbia	S. latissima	Portland	2	149	Augustine	48.7323	-123.376	367	398	23.06	22.07.2018	25.7	21.09.2018	61	-2.64	12.9965	14.804	11.625	30.6914	79.2516	11.4484	-0.187679	0.00170677	3.179	1.07751	-0.459675	-0.669355	-0.382864	48.7	14.1757	2.56427	36.2608	-11.04	6.98875	1.51189
British Columbia	S. latissima	Russell	1	157	Augustine	48.7505	-123.405	370	401	22.35	22.07.2018	19.01	20.08.2018	29	3.34	12.8988	14.804	11.625	50.2018	145.252	-14.9441	0.515313	-0.00532293	3.179	1.09508	-1.00099	-0.0432268	0.229478	48.7	14.1757	2.56427	36.2608	-11.04	6.98875	1.27369
British Columbia	S. latissima	Fulford	2	132	Augustine	48.748	-123.433	372	379	21.16	22.07.2018	19.3	21.09.2018	61	1.86	12.8873	14.996	11.528	67.0205	162.862	-8.79017	0.144101	-0.00143718	3.468	1.01239	0.0897668	-0.336723	0.240982	48.7	14.1757	2.56427	36.2608	-11.04	6.98875	0.667472
British Columbia	S. latissima	Russell	2	158	Augustine	48.7505	-123.405	366	415	18.2	22.07.2018	13.41	21.09.2018	61	4.79	12.8586	14.804	11.528	71.9539	165.669	-26.3187	0.431454	-0.00470472	3.276	1.07821	-0.563876	-0.615348	0.294989	48.7	14.1757	2.56427	36.2608	-11.04	6.98875	1.47421
British Columbia	S. latissima	Russell	1	152	Augustine	48.7505	-123.405	370	383	23.98	22.07.2018	23.95	20.08.2018	29	0.03	12.8988	14.804	11.625	50.2018	145.252	-0.125104	0.00431394	-4.14373e-05	3.179	1.09508	-1.00099	-0.0432268	0.229478	48.7	14.1757	2.56427	36.2608	-11.04	6.98875	1.27369
British Columbia	S. latissima	Russell	2	161	Augustine	48.7505	-123.405	366	417	20.75	22.07.2018	17.48	21.09.2018	61	3.27	12.8586	14.804	11.528	71.9539	165.669	-15.759	0.258345	-0.0026709	3.276	1.07821	-0.563876	-0.615348	0.294989	48.7	14.1757	2.56427	36.2608	-11.04	6.98875	1.47421
British Columbia	S. latissima	Russell	1	150	Augustine	48.7505	-123.405	366	382	18.84	22.07.2018	16.91	20.08.2018	29	1.93	12.8988	14.804	11.625	50.2018	145.252	-10.2442	0.353247	-0.003529	3.179	1.09508	-1.00099	-0.0432268	0.229478	48.7	14.1757	2.56427	36.2608	-11.04	6.98875	1.27369
British Columbia	S. latissima	Portland	1	136	Augustine	48.7323	-123.376	368	400	20.44	22.07.2018	18.41	20.08.2018	29	2.03	13.1493	15.473	11.625	53.0217	207.711	-9.93151	0.342466	-0.00343	3.848	1.00723	0.479224	0.213656	0.50297	48.7	14.1757	2.56427	36.2608	-11.04	6.98875	1.19585
British Columbia	S. latissima	Portland	2	147	Augustine	48.7323	-123.376	367	414	23.15	22.07.2018	0	21.09.2018	61	23.15	12.9965	14.804	11.625	30.6914	79.2516	-100	1.63934	-0.0522014	3.179	1.07751	-0.459675	-0.669355	-0.382864	48.7	14.1757	2.56427	36.2608	-11.04	6.98875	1.51189
British Columbia	S. latissima	Fulford	1	129	Augustine	48.748	-123.433	365	418	24.87	22.07.2018	24.24	20.08.2018	29	0.63	12.9662	15.091	11.625	123.244	291.068	-2.53317	0.0873508	-0.000850137	3.466	1.03506	-0.183969	-0.0312235	0.62553	48.7	14.1757	2.56427	36.2608	-11.04	6.98875	0.840723
British Columbia	S. latissima	Fulford	2	130	Augustine	48.748	-123.433	365	410	19.23	22.07.2018	16.36	21.09.2018	61	2.87	12.8873	14.996	11.528	67.0205	162.862	-14.9246	0.244666	-0.00250816	3.468	1.01239	0.0897668	-0.336723	0.240982	48.7	14.1757	2.56427	36.2608	-11.04	6.98875	0.667472
British Columbia	S. latissima	Portland	1	138	Augustine	48.7323	-123.376	367	373	19.66	22.07.2018	19.53	20.08.2018	29	0.13	13.1493	15.473	11.625	53.0217	207.711	-0.661241	0.0228014	-0.000217663	3.848	1.00723	0.479224	0.213656	0.50297	48.7	14.1757	2.56427	36.2608	-11.04	6.98875	1.19585
British Columbia	S. latissima	Russell	2	159	Augustine	48.7505	-123.405	370	380	20.7	22.07.2018	11.63	21.09.2018	61	9.07	12.8586	14.804	11.528	71.9539	165.669	-43.8164	0.718302	-0.00887274	3.276	1.07821	-0.563876	-0.615348	0.294989	48.7	14.1757	2.56427	36.2608	-11.04	6.98875	1.47421
France	L. hyperborea	Roscoff1	1	236	de Bettignies Florian	48.7089	-3.92694	61	73	21.07	20.07.2018	20.52	28.08.2018	39	0.55	16.4736	17.284	15.76	18.1485		-2.61035	0.066932	-0.000647089	1.524	1.04866	-0.168633	-0.0100896	1.0231	48.7	28.0343	1.39576	37.5452	-15.5237	5.85125	1.20183
France	L. hyperborea	Roscoff1	2	241	de Bettignies Florian	48.7089	-3.92694	62	80	19.36	20.07.2018	19.79	23.10.2018	95	-0.43	16.2766	17.284	15.378	18.1485		2.22107	-0.0233797	0.000219999	1.906	1.06661	-0.379194	-0.042237	0.984674	48.7	28.0343	1.39576	37.5452	-15.5237	5.85125	1.40611
France	L. hyperborea	Roscoff1	1	237	de Bettignies Florian	48.7089	-3.92694	61	74	20.18	20.07.2018	20.22	28.08.2018	39	-0.04	16.4736	17.284	15.76	18.1485		0.198216	-0.00508246	4.83793e-05	1.524	1.04866	-0.168633	-0.0100896	1.0231	48.7	28.0343	1.39576	37.5452	-15.5237	5.85125	1.20183
France	L. hyperborea	Roscoff1	1	235	de Bettignies Florian	48.7089	-3.92694	62	78	19.86	20.07.2018	20.63	28.08.2018	39	-0.77	16.4736	17.284	15.76	18.1485		3.87714	-0.0994138	0.000929431	1.524	1.04866	-0.168633	-0.0100896	1.0231	48.7	28.0343	1.39576	37.5452	-15.5237	5.85125	1.20183
France	L. hyperborea	Roscoff1	2	246	de Bettignies Florian	48.7089	-3.92694	61	75	19.89	20.07.2018	20.19	23.10.2018	95	-0.3	16.2766	17.284	15.378	18.1485		1.5083	-0.0158768	0.000150093	1.906	1.06661	-0.379194	-0.042237	0.984674	48.7	28.0343	1.39576	37.5452	-15.5237	5.85125	1.40611
France	L. hyperborea	Roscoff3	2	279	de Bettignies Florian	48.7325	-3.97139	70	112	18.15	20.07.2018	16.95	23.10.2018	95	1.2	16.0276	17.189	15.091	24.383		-6.61157	0.0695955	-0.000681185	2.098	1.00856	0.255073	0.565764	0.794451	48.7	28.0343	1.39576	37.5452	-15.5237	5.85125	1.61529
France	L. hyperborea	Roscoff1	2	243	de Bettignies Florian	48.7089	-3.92694	61	76	19.39	20.07.2018	19.96	23.10.2018	95	-0.57	16.2766	17.284	15.378	18.1485		2.93966	-0.0309438	0.000290224	1.906	1.06661	-0.379194	-0.042237	0.984674	48.7	28.0343	1.39576	37.5452	-15.5237	5.85125	1.40611
France	L. hyperborea	Roscoff2	1	254	de Bettignies Florian	48.7092	-3.95333	65	89	21.55	20.07.2018	20.12	28.08.2018	39	1.43	16.569	17.76	15.569	26.9545		-6.63573	0.170147	-0.00167986	2.191	0.990348	0.473142	-0.695667	0.429703	48.7	28.0343	1.39576	37.5452	-15.5237	5.85125	1.59851
France	L. hyperborea	Roscoff3	2	274	de Bettignies Florian	48.7325	-3.97139	69	106	18.38	20.07.2018	16.54	23.10.2018	95	1.84	16.0276	17.189	15.091	24.383		-10.0109	0.105378	-0.00105008	2.098	1.00856	0.255073	0.565764	0.794451	48.7	28.0343	1.39576	37.5452	-15.5237	5.85125	1.61529
France	L. hyperborea	Roscoff3	1	268	de Bettignies Florian	48.7325	-3.97139	69	108	20.9	20.07.2018	20.18	28.08.2018	39	0.72	16.2312	17.284	15.664	24.383		-3.44498	0.0883327	-0.000857161	1.62	0.994339	0.650701	0.102517	0.743464	48.7	28.0343	1.39576	37.5452	-15.5237	5.85125	1.49668
France	L. hyperborea	Roscoff1	1	238	de Bettignies Florian	48.7089	-3.92694	62	77	18.92	20.07.2018	11.17	28.08.2018	39	7.75	16.4736	17.284	15.76	18.1485		-40.9619	1.05031	-0.0126346	1.524	1.04866	-0.168633	-0.0100896	1.0231	48.7	28.0343	1.39576	37.5452	-15.5237	5.85125	1.20183
France	L. hyperborea	Roscoff1	2	241	de Bettignies Florian	48.7089	-3.92694	62	80	19.36	20.07.2018	19.79	23.10.2018	95	-0.43	16.2766	17.284	15.378	18.1485		2.22107	-0.0233797	0.000219999	1.906	1.06661	-0.379194	-0.042237	0.984674	48.7	28.0343	1.39576	37.5452	-15.5237	5.85125	1.40611
France	L. hyperborea	Roscoff1	2	246	de Bettignies Florian	48.7089	-3.92694	61	75	19.89	20.07.2018	20.19	23.10.2018	95	-0.3	16.2766	17.284	15.378	18.1485		1.5083	-0.0158768	0.000150093	1.906	1.06661	-0.379194	-0.042237	0.984674	48.7	28.0343	1.39576	37.5452	-15.5237	5.85125	1.40611
France	L. hyperborea	Roscoff2	2	263	de Bettignies Florian	48.7092	-3.95333	66	95	21.19	20.07.2018	15.15	23.10.2018	95	6.04	16.2461	17.665	14.996	26.9545		-28.504	0.300042	-0.00334444	2.669	0.984813	0.709048	-0.393645	0.363074	48.7	28.0343	1.39576	37.5452	-15.5237	5.85125	1.46577
France	L. hyperborea	Roscoff3	1	271	de Bettignies Florian	48.7325	-3.97139	69	105	19.47	20.07.2018	17.52	28.08.2018	39	1.95	16.2312	17.284	15.664	24.383		-10.0154	0.256805	-0.0025669	1.62	0.994339	0.650701	0.102517	0.743464	48.7	28.0343	1.39576	37.5452	-15.5237	5.85125	1.49668
France	L. hyperborea	Roscoff2	1	253	de Bettignies Florian	48.7092	-3.95333	66	96	18.78	20.07.2018	18.95	28.08.2018	39	-0.17	16.569	17.76	15.569	26.9545		0.905218	-0.0232107	0.000219431	2.191	0.990348	0.473142	-0.695667	0.429703	48.7	28.0343	1.39576	37.5452	-15.5237	5.85125	1.59851
France	L. hyperborea	Roscoff2	1	250	de Bettignies Florian	48.7092	-3.95333	65	91	20.77	20.07.2018	19.55	28.08.2018	39	1.22	16.569	17.76	15.569	26.9545		-5.87386	0.150612	-0.00147877	2.191	0.990348	0.473142	-0.695667	0.429703	48.7	28.0343	1.39576	37.5452	-15.5237	5.85125	1.59851
France	L. hyperborea	Roscoff3	1	272	de Bettignies Florian	48.7325	-3.97139	70	110	18.37	20.07.2018	18.55	28.08.2018	39	-0.18	16.2312	17.284	15.664	24.383		0.979858	-0.0251246	0.000237175	1.62	0.994339	0.650701	0.102517	0.743464	48.7	28.0343	1.39576	37.5452	-15.5237	5.85125	1.49668
France	L. hyperborea	Roscoff2	1	251	de Bettignies Florian	48.7092	-3.95333	66	93	20.01	20.07.2018	19.99	28.08.2018	39	0.02	16.569	17.76	15.569	26.9545		-0.09995	0.00256282	-2.442e-05	2.191	0.990348	0.473142	-0.695667	0.429703	48.7	28.0343	1.39576	37.5452	-15.5237	5.85125	1.59851
France	L. hyperborea	Roscoff2	2	258	de Bettignies Florian	48.7092	-3.95333	65	92	21.89	20.07.2018	19.48	23.10.2018	95	2.41	16.2461	17.665	14.996	26.9545		-11.0096	0.11589	-0.00117107	2.669	0.984813	0.709048	-0.393645	0.363074	48.7	28.0343	1.39576	37.5452	-15.5237	5.85125	1.46577
France	L. hyperborea	Roscoff3	1	266	de Bettignies Florian	48.7325	-3.97139	70	111	18.24	20.07.2018	10.31	28.08.2018	39	7.93	16.2312	17.284	15.664	24.383		-43.4759	1.11477	-0.0136232	1.62	0.994339	0.650701	0.102517	0.743464	48.7	28.0343	1.39576	37.5452	-15.5237	5.85125	1.49668
France	L. hyperborea	Roscoff2	2	261	de Bettignies Florian	48.7092	-3.95333	65	90	19.86	20.07.2018	19.5	23.10.2018	95	0.36	16.2461	17.665	14.996	26.9545		-1.81269	0.0190809	-0.000183248	2.669	0.984813	0.709048	-0.393645	0.363074	48.7	28.0343	1.39576	37.5452	-15.5237	5.85125	1.46577
France	L. hyperborea	Roscoff3	2	277	de Bettignies Florian	48.7325	-3.97139	69	107	18.68	20.07.2018	17.36	23.10.2018	95	1.32	16.0276	17.189	15.091	24.383		-7.06638	0.074383	-0.000730826	2.098	1.00856	0.255073	0.565764	0.794451	48.7	28.0343	1.39576	37.5452	-15.5237	5.85125	1.61529
France	L. hyperborea	Roscoff2	2	262	de Bettignies Florian	48.7092	-3.95333	66	94	20.81	20.07.2018	20.34	23.10.2018	95	0.47	16.2461	17.665	14.996	26.9545		-2.25853	0.023774	-0.000229319	2.669	0.984813	0.709048	-0.393645	0.363074	48.7	28.0343	1.39576	37.5452	-15.5237	5.85125	1.46577
France	L. hyperborea	Roscoff1	2	245	de Bettignies Florian	48.7089	-3.92694	62	79	18.09	20.07.2018	12.6	23.10.2018	95	5.49	16.2766	17.284	15.378	18.1485		-30.3483	0.319455	-0.00356942	1.906	1.06661	-0.379194	-0.042237	0.984674	48.7	28.0343	1.39576	37.5452	-15.5237	5.85125	1.40611
France	L. hyperborea	Roscoff1	2	243	de Bettignies Florian	48.7089	-3.92694	61	76	19.39	20.07.2018	19.96	23.10.2018	95	-0.57	16.2766	17.284	15.378	18.1485		2.93966	-0.0309438	0.000290224	1.906	1.06661	-0.379194	-0.042237	0.984674	48.7	28.0343	1.39576	37.5452	-15.5237	5.85125	1.40611
France	L. hyperborea	Roscoff3	2	273	de Bettignies Florian	48.7325	-3.97139	70	109	21.49	20.07.2018	20.67	23.10.2018	95	0.82	16.0276	17.189	15.091	24.383		-3.81573	0.0401656	-0.000390968	2.098	1.00856	0.255073	0.565764	0.794451	48.7	28.0343	1.39576	37.5452	-15.5237	5.85125	1.61529
France	L. hyperborea	Roscoff1	2	245	de Bettignies Florian	48.7089	-3.92694	62	79	18.09	20.07.2018	12.6	23.10.2018	95	5.49	16.2766	17.284	15.378	18.1485		-30.3483	0.319455	-0.00356942	1.906	1.06661	-0.379194	-0.042237	0.984674	48.7	28.0343	1.39576	37.5452	-15.5237	5.85125	1.40611
France	S. latissima	Roscoff1	1	240	de Bettignies Florian	48.7089	-3.92694	63	83	20.82	20.07.2018	13.71	28.08.2018	39	7.11	16.4736	17.284	15.76	18.1485		-34.1499	0.875637	-0.0101102	1.524	1.04866	-0.168633	-0.0100896	1.0231	48.7	37.3459	1.00027	35.9368	-13.8275	8.1875	1.20183
France	S. latissima	Roscoff1	2	248	de Bettignies Florian	48.7089	-3.92694	64	88	20.3	20.07.2018	15	23.10.2018	95	5.3	16.2766	17.284	15.378	18.1485		-26.1084	0.274825	-0.00301177	1.906	1.06661	-0.379194	-0.042237	0.984674	48.7	37.3459	1.00027	35.9368	-13.8275	8.1875	1.40611
France	S. latissima	Roscoff2	1	252	de Bettignies Florian	48.7092	-3.95333	67	99	19.41	20.07.2018	18.85	28.08.2018	39	0.56	16.569	17.76	15.569	26.9545		-2.88511	0.0739772	-0.000713358	2.191	0.990348	0.473142	-0.695667	0.429703	48.7	37.3459	1.00027	35.9368	-13.8275	8.1875	1.59851
France	S. latissima	Roscoff1	2	247	de Bettignies Florian	48.7089	-3.92694	63	81	22.08	20.07.2018	10.99	23.10.2018	95	11.09	16.2766	17.284	15.378	18.1485		-50.2264	0.528699	-0.00689362	1.906	1.06661	-0.379194	-0.042237	0.984674	48.7	37.3459	1.00027	35.9368	-13.8275	8.1875	1.40611
France	S. latissima	Roscoff1	2	247	de Bettignies Florian	48.7089	-3.92694	63	81	22.08	20.07.2018	10.99	23.10.2018	95	11.09	16.2766	17.284	15.378	18.1485		-50.2264	0.528699	-0.00689362	1.906	1.06661	-0.379194	-0.042237	0.984674	48.7	37.3459	1.00027	35.9368	-13.8275	8.1875	1.40611
France	S. latissima	Roscoff2	2	260	de Bettignies Florian	48.7092	-3.95333	68	104	20.36	20.07.2018	13.49	23.10.2018	95	6.87	16.2461	17.665	14.996	26.9545		-33.7426	0.355186	-0.00408486	2.669	0.984813	0.709048	-0.393645	0.363074	48.7	37.3459	1.00027	35.9368	-13.8275	8.1875	1.46577
France	S. latissima	Roscoff1	1	233	de Bettignies Florian	48.7089	-3.92694	64	85	19.2	20.07.2018	9.13	28.08.2018	39	10.07	16.4736	17.284	15.76	18.1485		-52.4479	1.34482	-0.017697	1.524	1.04866	-0.168633	-0.0100896	1.0231	48.7	37.3459	1.00027	35.9368	-13.8275	8.1875	1.20183
France	S. latissima	Roscoff2	2	264	de Bettignies Florian	48.7092	-3.95333	67	97	20.43	20.07.2018	13.07	23.10.2018	95	7.36	16.2461	17.665	14.996	26.9545		-36.0255	0.379215	-0.00442892	2.669	0.984813	0.709048	-0.393645	0.363074	48.7	37.3459	1.00027	35.9368	-13.8275	8.1875	1.46577
France	S. latissima	Roscoff3	1	265	de Bettignies Florian	48.7325	-3.97139	72	119	20.25	20.07.2018	18.55	28.08.2018	39	1.7	16.2312	17.284	15.664	24.383		-8.39506	0.215258	-0.00213799	1.62	0.994339	0.650701	0.102517	0.743464	48.7	37.3459	1.00027	35.9368	-13.8275	8.1875	1.49668
France	S. latissima	Roscoff2	1	249	de Bettignies Florian	48.7092	-3.95333	67	98	20.62	20.07.2018	12.63	28.08.2018	39	7.99	16.569	17.76	15.569	26.9545		-38.7488	0.993559	-0.0118294	2.191	0.990348	0.473142	-0.695667	0.429703	48.7	37.3459	1.00027	35.9368	-13.8275	8.1875	1.59851
France	S. latissima	Roscoff1	2	242	de Bettignies Florian	48.7089	-3.92694	64	86	19.84	20.07.2018	5.29	23.10.2018	95	14.55	16.2766	17.284	15.378	18.1485		-73.3367	0.771965	-0.0126096	1.906	1.06661	-0.379194	-0.042237	0.984674	48.7	37.3459	1.00027	35.9368	-13.8275	8.1875	1.40611
France	S. latissima	Roscoff2	1	256	de Bettignies Florian	48.7092	-3.95333	68	101	21.81	20.07.2018	19.02	28.08.2018	39	2.79	16.569	17.76	15.569	26.9545		-12.7923	0.328008	-0.00334531	2.191	0.990348	0.473142	-0.695667	0.429703	48.7	37.3459	1.00027	35.9368	-13.8275	8.1875	1.59851
France	S. latissima	Roscoff3	1	270	de Bettignies Florian	48.7325	-3.97139	72	117	20.94	20.07.2018	17.68	28.08.2018	39	3.26	16.2312	17.284	15.664	24.383		-15.5683	0.399187	-0.00412456	1.62	0.994339	0.650701	0.102517	0.743464	48.7	37.3459	1.00027	35.9368	-13.8275	8.1875	1.49668
France	S. latissima	Roscoff1	1	234	de Bettignies Florian	48.7089	-3.92694	63	84	20.35	20.07.2018	15.9	28.08.2018	39	4.45	16.4736	17.284	15.76	18.1485		-21.8673	0.560701	-0.00599329	1.524	1.04866	-0.168633	-0.0100896	1.0231	48.7	37.3459	1.00027	35.9368	-13.8275	8.1875	1.20183
France	S. latissima	Roscoff1	2	248	de Bettignies Florian	48.7089	-3.92694	64	88	20.3	20.07.2018	15	23.10.2018	95	5.3	16.2766	17.284	15.378	18.1485		-26.1084	0.274825	-0.00301177	1.906	1.06661	-0.379194	-0.042237	0.984674	48.7	37.3459	1.00027	35.9368	-13.8275	8.1875	1.40611
France	S. latissima	Roscoff3	1	269	de Bettignies Florian	48.7325	-3.97139	71	113	20.36	20.07.2018	18.57	28.08.2018	39	1.79	16.2312	17.284	15.664	24.383		-8.79175	0.225429	-0.00224416	1.62	0.994339	0.650701	0.102517	0.743464	48.7	37.3459	1.00027	35.9368	-13.8275	8.1875	1.49668
France	S. latissima	Roscoff3	2	278	de Bettignies Florian	48.7325	-3.97139	71	116	19.81	20.07.2018	11.27	23.10.2018	95	8.54	16.0276	17.189	15.091	24.383		-43.1095	0.453785	-0.0055608	2.098	1.00856	0.255073	0.565764	0.794451	48.7	37.3459	1.00027	35.9368	-13.8275	8.1875	1.61529
France	S. latissima	Roscoff1	2	244	de Bettignies Florian	48.7089	-3.92694	63	82	20.75	20.07.2018	12.81	23.10.2018	95	7.94	16.2766	17.284	15.378	18.1485		-38.2651	0.40279	-0.00478127	1.906	1.06661	-0.379194	-0.042237	0.984674	48.7	37.3459	1.00027	35.9368	-13.8275	8.1875	1.40611
France	S. latissima	Roscoff3	1	267	de Bettignies Florian	48.7325	-3.97139	71	114	19.87	20.07.2018	13.59	28.08.2018	39	6.28	16.2312	17.284	15.664	24.383		-31.6054	0.810396	-0.00917888	1.62	0.994339	0.650701	0.102517	0.743464	48.7	37.3459	1.00027	35.9368	-13.8275	8.1875	1.49668
France	S. latissima	Roscoff1	2	244	de Bettignies Florian	48.7089	-3.92694	63	82	20.75	20.07.2018	12.81	23.10.2018	95	7.94	16.2766	17.284	15.378	18.1485		-38.2651	0.40279	-0.00478127	1.906	1.06661	-0.379194	-0.042237	0.984674	48.7	37.3459	1.00027	35.9368	-13.8275	8.1875	1.40611
France	S. latissima	Roscoff1	2	242	de Bettignies Florian	48.7089	-3.92694	64	86	19.84	20.07.2018	5.29	23.10.2018	95	14.55	16.2766	17.284	15.378	18.1485		-73.3367	0.771965	-0.0126096	1.906	1.06661	-0.379194	-0.042237	0.984674	48.7	37.3459	1.00027	35.9368	-13.8275	8.1875	1.40611
France	S. latissima	Roscoff3	2	275	de Bettignies Florian	48.7325	-3.97139	72	118	19.05	20.07.2018	10.17	23.10.2018	95	8.88	16.0276	17.189	15.091	24.383		-46.6142	0.490676	-0.00615787	2.098	1.00856	0.255073	0.565764	0.794451	48.7	37.3459	1.00027	35.9368	-13.8275	8.1875	1.61529
France	S. latissima	Roscoff1	1	239	de Bettignies Florian	48.7089	-3.92694	64	87	21.26	20.07.2018	15.01	28.08.2018	39	6.25	16.4736	17.284	15.76	18.1485		-29.3979	0.753793	-0.00845071	1.524	1.04866	-0.168633	-0.0100896	1.0231	48.7	37.3459	1.00027	35.9368	-13.8275	8.1875	1.20183
France	S. latissima	Roscoff2	1	255	de Bettignies Florian	48.7092	-3.95333	68	102	22.12	20.07.2018	16.62	28.08.2018	39	5.5	16.569	17.76	15.569	26.9545		-24.8644	0.637548	-0.00696573	2.191	0.990348	0.473142	-0.695667	0.429703	48.7	37.3459	1.00027	35.9368	-13.8275	8.1875	1.59851
France	S. latissima	Roscoff3	2	280	de Bettignies Florian	48.7325	-3.97139	72	120	20.24	20.07.2018	9.67	23.10.2018	95	10.57	16.0276	17.189	15.091	24.383		-52.2233	0.549719	-0.00724684	2.098	1.00856	0.255073	0.565764	0.794451	48.7	37.3459	1.00027	35.9368	-13.8275	8.1875	1.61529
France	S. latissima	Roscoff2	2	259	de Bettignies Florian	48.7092	-3.95333	67	100	20.09	20.07.2018	8.29	23.10.2018	95	11.8	16.2461	17.665	14.996	26.9545		-58.7357	0.61827	-0.00863011	2.669	0.984813	0.709048	-0.393645	0.363074	48.7	37.3459	1.00027	35.9368	-13.8275	8.1875	1.46577
France	S. latissima	Roscoff2	2	257	de Bettignies Florian	48.7092	-3.95333	68	103	21.64	20.07.2018	14.4	23.10.2018	95	7.24	16.2461	17.665	14.996	26.9545		-33.4566	0.352174	-0.00405632	2.669	0.984813	0.709048	-0.393645	0.363074	48.7	37.3459	1.00027	35.9368	-13.8275	8.1875	1.46577
France	S. latissima	Roscoff3	2	276	de Bettignies Florian	48.7325	-3.97139	71	115	20.3	20.07.2018	12.81	23.10.2018	95	7.49	16.0276	17.189	15.091	24.383		-36.8966	0.388385	-0.0045612	2.098	1.00856	0.255073	0.565764	0.794451	48.7	37.3459	1.00027	35.9368	-13.8275	8.1875	1.61529
England	L. hyperborea	Breakwater	1	192	Smale	50.3342	-4.14538	667	622	21.6	03.07.2018	19.9	31.07.2018	28	1.7	17.0303	18.426	15.76	232.26	318.189	-7.87037	0.281085	-0.00279288	2.666	1.04715	-0.423229	0.0567679	-0.935887	50.3	17.6532	1.67572	29.4897	-15.7925	8.81875	1.41588
England	L. hyperborea	Ramscliff Pt	1	211	Smale	50.3608	-4.12942	606	636	21.8	03.07.2018	20.1	31.07.2018	28	1.7	17.2687	18.806	16.046	240.235	303.422	-7.79817	0.278506	-0.00276741	2.76	1.04863	-0.315891	-0.621364	0.765796	50.3	17.6532	1.67572	29.4897	-15.7925	8.81875	1.70305
England	L. hyperborea	Batton Bay	1	168	Smale	50.3547	-4.1496	608	650	21.6	03.07.2018	21.2	31.07.2018	28	0.4	17.1323	18.521	16.046	287.841	388.862	-1.85185	0.0661376	-0.000637772	2.475	1.04715	-0.423229	0.0567679	-0.935887	50.3	17.6532	1.67572	29.4897	-15.7925	8.81875	1.41588
England	L. hyperborea	Ramscliff Pt	2	224	Smale	50.3608	-4.12942	605	587	9.7	03.07.2018	18.8	04.09.2018	63	9.1	16.6966	18.331	15.76	196.508	312.032	93.8144	-1.48912	0.00976886	2.571	1.06282	-0.343306	-0.49409	-0.817496	50.3	17.6532	1.67572	29.4897	-15.7925	8.81875	1.65489
England	L. hyperborea	Batton Bay	1	169	Smale	50.3547	-4.1496	601	643	21.3	03.07.2018	20.1	31.07.2018	28	1.2	17.1323	18.521	16.046	287.841	388.862	-5.6338	0.201207	-0.00197549	2.475	1.04715	-0.423229	0.0567679	-0.935887	50.3	17.6532	1.67572	29.4897	-15.7925	8.81875	1.41588
England	L. hyperborea	Breakwater	1	193	Smale	50.3342	-4.14538	667	625	19.1	03.07.2018	19.1	31.07.2018	28	0	17.0303	18.426	15.76	232.26	318.189	0	0	0	2.666	1.04715	-0.423229	0.0567679	-0.935887	50.3	17.6532	1.67572	29.4897	-15.7925	8.81875	1.41588
England	L. hyperborea	Breakwater	2	197	Smale	50.3342	-4.14538	611	652	20.8	03.07.2018	21.6	04.09.2018	63	0.8	16.508	17.855	15.664	89.2851	138.508	3.84615	-0.0610501	0.000572062	2.191	1.05468	-0.232325	-0.312762	-0.53641	50.3	17.6532	1.67572	29.4897	-15.7925	8.81875	1.0815
England	L. hyperborea	Ramscliff Pt	1	213	Smale	50.3608	-4.12942	605	626	20.5	03.07.2018	19.3	31.07.2018	28	1.2	17.2687	18.806	16.046	240.235	303.422	-5.85366	0.209059	-0.00205114	2.76	1.04863	-0.315891	-0.621364	0.765796	50.3	17.6532	1.67572	29.4897	-15.7925	8.81875	1.70305
England	L. hyperborea	Ramscliff Pt	2	222	Smale	50.3608	-4.12942	605	586	21.5	03.07.2018	19.9	04.09.2018	63	-1.6	16.6966	18.331	15.76	196.508	312.032	-7.44186	0.118125	-0.00117089	2.571	1.06282	-0.343306	-0.49409	-0.817496	50.3	17.6532	1.67572	29.4897	-15.7925	8.81875	1.65489
England	L. hyperborea	Batton Bay	1	176	Smale	50.3547	-4.1496	608	641	20.1	03.07.2018	19.6	31.07.2018	28	0.5	17.1323	18.521	16.046	287.841	388.862	-2.48756	0.0888415	-0.000856499	2.475	1.04715	-0.423229	0.0567679	-0.935887	50.3	17.6532	1.67572	29.4897	-15.7925	8.81875	1.41588
England	L. hyperborea	Breakwater	1	185	Smale	50.3342	-4.14538	611	629	19.8	03.07.2018	18.3	31.07.2018	28	1.5	17.0303	18.426	15.76	232.26	318.189	-7.57576	0.270563	-0.00267314	2.666	1.04715	-0.423229	0.0567679	-0.935887	50.3	17.6532	1.67572	29.4897	-15.7925	8.81875	1.41588
England	L. hyperborea	Batton Bay	1	170	Smale	50.3547	-4.1496	601	655	19.1	03.07.2018	18.6	31.07.2018	28	0.5	17.1323	18.521	16.046	287.841	388.862	-2.6178	0.0934929	-0.000899652	2.475	1.04715	-0.423229	0.0567679	-0.935887	50.3	17.6532	1.67572	29.4897	-15.7925	8.81875	1.41588
England	L. hyperborea	Breakwater	2	202	Smale	50.3342	-4.14538	667	637	20.8	03.07.2018	20.7	04.09.2018	63	-0.1	16.508	17.855	15.664	89.2851	138.508	-0.480769	0.00763126	-7.29795e-05	2.191	1.05468	-0.232325	-0.312762	-0.53641	50.3	17.6532	1.67572	29.4897	-15.7925	8.81875	1.0815
England	L. hyperborea	Ramscliff Pt	1	212	Smale	50.3608	-4.12942	606	621	21.1	03.07.2018	18.7	31.07.2018	28	2.4	17.2687	18.806	16.046	240.235	303.422	-11.3744	0.406229	-0.00410568	2.76	1.04863	-0.315891	-0.621364	0.765796	50.3	17.6532	1.67572	29.4897	-15.7925	8.81875	1.70305
England	L. hyperborea	Ramscliff Pt	2	230	Smale	50.3608	-4.12942	606	660	21.3	03.07.2018	19.8	04.09.2018	63	-1.5	16.6966	18.331	15.76	196.508	312.032	-7.04225	0.111782	-0.0011053	2.571	1.06282	-0.343306	-0.49409	-0.817496	50.3	17.6532	1.67572	29.4897	-15.7925	8.81875	1.65489
England	L. hyperborea	Breakwater	2	201	Smale	50.3342	-4.14538	611	645	21.4	03.07.2018	13.5	04.09.2018	63	-7.9	16.508	17.855	15.664	89.2851	138.508	-36.9159	0.585966	-0.00690337	2.191	1.05468	-0.232325	-0.312762	-0.53641	50.3	17.6532	1.67572	29.4897	-15.7925	8.81875	1.0815
England	L. hyperborea	Breakwater	2	203	Smale	50.3342	-4.14538	667	654	21.6	03.07.2018	20.6	04.09.2018	63	-1	16.508	17.855	15.664	89.2851	138.508	-4.62963	0.0734862	-0.000718359	2.191	1.05468	-0.232325	-0.312762	-0.53641	50.3	17.6532	1.67572	29.4897	-15.7925	8.81875	1.0815
England	L. hyperborea	Ramscliff Pt	1	216	Smale	50.3608	-4.12942	605	556	22.2	03.07.2018	19.7	31.07.2018	28	2.5	17.2687	18.806	16.046	240.235	303.422	-11.2613	0.402188	-0.00407209	2.76	1.04863	-0.315891	-0.621364	0.765796	50.3	17.6532	1.67572	29.4897	-15.7925	8.81875	1.70305
England	L. hyperborea	Breakwater	1	187	Smale	50.3342	-4.14538	611	614	22	03.07.2018	21.8	31.07.2018	28	0.2	17.0303	18.426	15.76	232.26	318.189	-0.909091	0.0324675	-0.000311917	2.666	1.04715	-0.423229	0.0567679	-0.935887	50.3	17.6532	1.67572	29.4897	-15.7925	8.81875	1.41588
England	L. hyperborea	Ramscliff Pt	2	228	Smale	50.3608	-4.12942	606	628	21.2	03.07.2018	19.9	04.09.2018	63	-1.3	16.6966	18.331	15.76	196.508	312.032	-6.13208	0.0973345	-0.000957827	2.571	1.06282	-0.343306	-0.49409	-0.817496	50.3	17.6532	1.67572	29.4897	-15.7925	8.81875	1.65489
England	S. latissima	Ramscliff Pt	1	210	Smale	50.3608	-4.12942	604	656	21.6	03.07.2018	20	31.07.2018	28	1.6	17.2687	18.806	16.046	240.235	303.422	-7.40741	0.26455	-0.00262241	2.76	1.04863	-0.315891	-0.621364	0.765796	50.3	18.4036	1.90848	35.0043	-16.6638	7.025	1.70305
England	S. latissima	Breakwater	1	195	Smale	50.3342	-4.14538	609	653	21.1	03.07.2018	21.2	31.07.2018	28	-0.1	17.0303	18.426	15.76	232.26	318.189	0.473934	-0.0169262	0.000161239	2.666	1.04715	-0.423229	0.0567679	-0.935887	50.3	18.4036	1.90848	35.0043	-16.6638	7.025	1.41588
England	S. latissima	Breakwater	1	189	Smale	50.3342	-4.14538	609	632	22.7	03.07.2018	21.9	31.07.2018	28	0.8	17.0303	18.426	15.76	232.26	318.189	-3.52423	0.125865	-0.00122636	2.666	1.04715	-0.423229	0.0567679	-0.935887	50.3	18.4036	1.90848	35.0043	-16.6638	7.025	1.41588
England	S. latissima	Breakwater	2	200	Smale	50.3342	-4.14538	612	630	20.1	03.07.2018	19.7	04.09.2018	63	-0.4	16.508	17.855	15.664	89.2851	138.508	-1.99005	0.0315881	-0.000303799	2.191	1.05468	-0.232325	-0.312762	-0.53641	50.3	18.4036	1.90848	35.0043	-16.6638	7.025	1.0815
England	S. latissima	Breakwater	2	206	Smale	50.3342	-4.14538	609	638	20.8	03.07.2018	20.7	04.09.2018	63	-0.1	16.508	17.855	15.664	89.2851	138.508	-0.480769	0.00763126	-7.29795e-05	2.191	1.05468	-0.232325	-0.312762	-0.53641	50.3	18.4036	1.90848	35.0043	-16.6638	7.025	1.0815
England	S. latissima	Ramscliff Pt	2	221	Smale	50.3608	-4.12942	602	631	21.3	03.07.2018	21.4	04.09.2018	63	0.1	16.6966	18.331	15.76	196.508	312.032	0.469484	-0.00745212	7.10203e-05	2.571	1.06282	-0.343306	-0.49409	-0.817496	50.3	18.4036	1.90848	35.0043	-16.6638	7.025	1.65489
England	S. latissima	Batton Bay	1	173	Smale	50.3547	-4.1496	610	649	22	03.07.2018	22	31.07.2018	28	0	17.1323	18.521	16.046	287.841	388.862	0	0	0	2.475	1.04715	-0.423229	0.0567679	-0.935887	50.3	18.4036	1.90848	35.0043	-16.6638	7.025	1.41588
England	S. latissima	Ramscliff Pt	1	219	Smale	50.3608	-4.12942	602	644	21.3	03.07.2018	21.1	31.07.2018	28	0.2	17.2687	18.806	16.046	240.235	303.422	-0.938967	0.0335345	-0.000321752	2.76	1.04863	-0.315891	-0.621364	0.765796	50.3	18.4036	1.90848	35.0043	-16.6638	7.025	1.70305
England	S. latissima	Batton Bay	1	175	Smale	50.3547	-4.1496	610	620	21.8	03.07.2018	21.1	31.07.2018	28	0.7	17.1323	18.521	16.046	287.841	388.862	-3.21101	0.114679	-0.00111368	2.475	1.04715	-0.423229	0.0567679	-0.935887	50.3	18.4036	1.90848	35.0043	-16.6638	7.025	1.41588
England	S. latissima	Ramscliff Pt	1	215	Smale	50.3608	-4.12942	604	617	24.1	03.07.2018	22.1	31.07.2018	28	2	17.2687	18.806	16.046	240.235	303.422	-8.29876	0.296384	-0.00296554	2.76	1.04863	-0.315891	-0.621364	0.765796	50.3	18.4036	1.90848	35.0043	-16.6638	7.025	1.70305
England	S. latissima	Batton Bay	1	177	Smale	50.3547	-4.1496	603	648	20.6	03.07.2018	20.6	31.07.2018	28	0	17.1323	18.521	16.046	287.841	388.862	0	0	0	2.475	1.04715	-0.423229	0.0567679	-0.935887	50.3	18.4036	1.90848	35.0043	-16.6638	7.025	1.41588
England	S. latissima	Ramscliff Pt	2	229	Smale	50.3608	-4.12942	602	640	22.8	03.07.2018	20.3	04.09.2018	63	-2.5	16.6966	18.331	15.76	196.508	312.032	-10.9649	0.174046	-0.00176156	2.571	1.06282	-0.343306	-0.49409	-0.817496	50.3	18.4036	1.90848	35.0043	-16.6638	7.025	1.65489
England	S. latissima	Ramscliff Pt	1	217	Smale	50.3608	-4.12942	602	627	19.7	03.07.2018	18.9	31.07.2018	28	0.8	17.2687	18.806	16.046	240.235	303.422	-4.06091	0.145033	-0.00140764	2.76	1.04863	-0.315891	-0.621364	0.765796	50.3	18.4036	1.90848	35.0043	-16.6638	7.025	1.70305
England	S. latissima	Ramscliff Pt	2	227	Smale	50.3608	-4.12942	604	659	23.9	03.07.2018	22.2	04.09.2018	63	-1.7	16.6966	18.331	15.76	196.508	312.032	-7.11297	0.112904	-0.00112247	2.571	1.06282	-0.343306	-0.49409	-0.817496	50.3	18.4036	1.90848	35.0043	-16.6638	7.025	1.65489
England	S. latissima	Breakwater	2	205	Smale	50.3342	-4.14538	609	647	20.8	03.07.2018	18.5	04.09.2018	63	-2.3	16.508	17.855	15.664	89.2851	138.508	-11.0577	0.175519	-0.00176977	2.191	1.05468	-0.232325	-0.312762	-0.53641	50.3	18.4036	1.90848	35.0043	-16.6638	7.025	1.0815
England	S. latissima	Breakwater	2	208	Smale	50.3342	-4.14538	612	633	20.5	03.07.2018	10.6	04.09.2018	63	-9.9	16.508	17.855	15.664	89.2851	138.508	-48.2927	0.766551	-0.00979441	2.191	1.05468	-0.232325	-0.312762	-0.53641	50.3	18.4036	1.90848	35.0043	-16.6638	7.025	1.0815
England	S. latissima	Breakwater	1	191	Smale	50.3342	-4.14538	612	634	21.4	03.07.2018	20.4	31.07.2018	28	1	17.0303	18.426	15.76	232.26	318.189	-4.6729	0.166889	-0.00163107	2.666	1.04715	-0.423229	0.0567679	-0.935887	50.3	18.4036	1.90848	35.0043	-16.6638	7.025	1.41588
England	S. latissima	Batton Bay	1	171	Smale	50.3547	-4.1496	603	639	20.7	03.07.2018	19.7	31.07.2018	28	1	17.1323	18.521	16.046	287.841	388.862	-4.83092	0.172533	-0.00168495	2.475	1.04715	-0.423229	0.0567679	-0.935887	50.3	18.4036	1.90848	35.0043	-16.6638	7.025	1.41588
England	S. latissima	Breakwater	1	186	Smale	50.3342	-4.14538	612	618	21	03.07.2018	20.1	31.07.2018	28	0.9	17.0303	18.426	15.76	232.26	318.189	-4.28571	0.153061	-0.00149176	2.666	1.04715	-0.423229	0.0567679	-0.935887	50.3	18.4036	1.90848	35.0043	-16.6638	7.025	1.41588
England	S. latissima	Ramscliff Pt	2	225	Smale	50.3608	-4.12942	604	616	18.9	03.07.2018	19	04.09.2018	63	0.1	16.6966	18.331	15.76	196.508	312.032	0.529101	-0.00839842	7.95642e-05	2.571	1.06282	-0.343306	-0.49409	-0.817496	50.3	18.4036	1.90848	35.0043	-16.6638	7.025	1.65489
W Scotland	L. hyperborea	Danger Reef	1	494	Alasdair	56.472	-5.46467	671	690	20.2	17.07.2018	17	29.08.2018	43	-3.2	13.0739	13.942	12.013	105.719	194.749	-15.8416	0.368409	-0.00380534	1.929	1.01804	-0.145688	-0.493958	-0.876933	56.5	28.9535	1.35792	36.289	-15.3238	6.325	1.51658
W Scotland	L. hyperborea	Goat Island	1	508	Alasdair	56.5252	-5.46093	661	687	21.1	17.07.2018	14.8	29.08.2018	43	-6.3	13.1331	13.846	12.013	165.146	315.756	-29.8578	0.694368	-0.0078039	1.833	1.08097	-0.924452	-0.285198	-0.403224	56.5	28.9535	1.35792	36.289	-15.3238	6.325	1.61287
W Scotland	L. hyperborea	Danger Reef	1	493	Alasdair	56.472	-5.46467	671	704	18.3	17.07.2018	13.8	29.08.2018	43	-4.5	13.0739	13.942	12.013	105.719	194.749	-24.5902	0.571864	-0.00617391	1.929	1.01804	-0.145688	-0.493958	-0.876933	56.5	28.9535	1.35792	36.289	-15.3238	6.325	1.51658
W Scotland	L. hyperborea	Danger Reef	2	506	Alasdair	56.472	-5.46467	671	718	21.9	17.07.2018	16.32	27.09.2018	72	-5.58	13.7867	14.038	13.269	11.8244	41.0216	-25.4795	0.353881	-0.00387882	0.769	1.01605	-0.154401	-0.526736	-0.85297	56.5	28.9535	1.35792	36.289	-15.3238	6.325	1.53411
W Scotland	L. hyperborea	Goat Island	2	515	Alasdair	56.5252	-5.46093	670	689	20.8	17.07.2018	16.19	27.09.2018	72	-4.61	13.5421	13.942	12.883	9.3878	31.1279	-22.1635	0.307826	-0.00329975	1.059	0.986305	0.377028	0.786512	0.321625	56.5	28.9535	1.35792	36.289	-15.3238	6.325	1.48516
W Scotland	L. hyperborea	Goat Island	1	507	Alasdair	56.5252	-5.46093	670	701	20.4	17.07.2018	14	29.08.2018	43	-6.4	13.1331	13.846	12.013	165.146	315.756	-31.3725	0.729594	-0.00826374	1.833	1.08097	-0.924452	-0.285198	-0.403224	56.5	28.9535	1.35792	36.289	-15.3238	6.325	1.61287
W Scotland	L. hyperborea	Danger Reef	2	505	Alasdair	56.472	-5.46467	671	716	21.9	17.07.2018	15.22	27.09.2018	72	-6.68	13.7867	14.038	13.269	11.8244	41.0216	-30.5023	0.423643	-0.00479016	0.769	1.01605	-0.154401	-0.526736	-0.85297	56.5	28.9535	1.35792	36.289	-15.3238	6.325	1.53411
W Scotland	L. hyperborea	Danger Reef	2	501	Alasdair	56.472	-5.46467	667	694	21.5	17.07.2018	17.07	27.09.2018	72	-4.43	13.7867	14.038	13.269	11.8244	41.0216	-20.6047	0.286176	-0.00304531	0.769	1.01605	-0.154401	-0.526736	-0.85297	56.5	28.9535	1.35792	36.289	-15.3238	6.325	1.53411
W Scotland	L. hyperborea	Goat Island	2	519	Alasdair	56.5252	-5.46093	661	713	20.9	17.07.2018	10.9	27.09.2018	72	-10	13.5421	13.942	12.883	9.3878	31.1279	-47.8469	0.66454	-0.0084715	1.059	0.986305	0.377028	0.786512	0.321625	56.5	28.9535	1.35792	36.289	-15.3238	6.325	1.48516
W Scotland	L. hyperborea	Goat Island	1	511	Alasdair	56.5252	-5.46093	670	679	19.8	17.07.2018	14.14	29.08.2018	43	-5.66	13.1331	13.846	12.013	165.146	315.756	-28.5859	0.664787	-0.00738634	1.833	1.08097	-0.924452	-0.285198	-0.403224	56.5	28.9535	1.35792	36.289	-15.3238	6.325	1.61287
W Scotland	L. hyperborea	Goat Island	2	521	Alasdair	56.5252	-5.46093	670	684	21.2	17.07.2018	19.15	27.09.2018	72	-2.05	13.5421	13.942	12.883	9.3878	31.1279	-9.66981	0.134303	-0.00134567	1.059	0.986305	0.377028	0.786512	0.321625	56.5	28.9535	1.35792	36.289	-15.3238	6.325	1.48516
W Scotland	L. hyperborea	Goat Island	2	518	Alasdair	56.5252	-5.46093	661	685	21.7	17.07.2018	15.31	27.09.2018	72	-6.39	13.5421	13.942	12.883	9.3878	31.1279	-29.447	0.408986	-0.00459148	1.059	0.986305	0.377028	0.786512	0.321625	56.5	28.9535	1.35792	36.289	-15.3238	6.325	1.48516
W Scotland	L. hyperborea	The Greggs	1	527	Alasdair	56.4784	-5.51168	664	707	21.5	17.07.2018	17.4	29.08.2018	43	-4.1	13.2139	14.134	12.207	179.304	246.791	-19.0698	0.443483	-0.00467825	1.927	1.05492	-0.156874	0.29429	0.997197	56.5	28.9535	1.35792	36.289	-15.3238	6.325	1.44836
W Scotland	L. hyperborea	The Greggs	1	528	Alasdair	56.4784	-5.51168	663	711	21.8	17.07.2018	17.1	29.08.2018	43	-4.7	13.2139	14.134	12.207	179.304	246.791	-21.5596	0.501387	-0.00536857	1.927	1.05492	-0.156874	0.29429	0.997197	56.5	28.9535	1.35792	36.289	-15.3238	6.325	1.44836
W Scotland	L. hyperborea	The Greggs	1	529	Alasdair	56.4784	-5.51168	664	696	20.6	17.07.2018	14	29.08.2018	43	-6.6	13.2139	14.134	12.207	179.304	246.791	-32.0388	0.745089	-0.00848007	1.927	1.05492	-0.156874	0.29429	0.997197	56.5	28.9535	1.35792	36.289	-15.3238	6.325	1.44836
W Scotland	L. hyperborea	Danger Reef	2	500	Alasdair	56.472	-5.46467	667	680	18.6	17.07.2018	14.58	27.09.2018	72	-4.02	13.7867	14.038	13.269	11.8244	41.0216	-21.6129	0.300179	-0.00318808	0.769	1.01605	-0.154401	-0.526736	-0.85297	56.5	28.9535	1.35792	36.289	-15.3238	6.325	1.53411
W Scotland	L. hyperborea	The Greggs	2	531	Alasdair	56.4784	-5.51168	664	698	21.1	17.07.2018	16.08	27.09.2018	72	-5.02	13.8352	14.038	13.076	26.5271	51.8113	-23.7915	0.330437	-0.00357874	0.962	1.07049	-0.126726	-0.377025	0.946094	56.5	28.9535	1.35792	36.289	-15.3238	6.325	1.44985
W Scotland	L. hyperborea	Danger Reef	1	492	Alasdair	56.472	-5.46467	667	705	18.1	17.07.2018	14.7	29.08.2018	43	-3.4	13.0739	13.942	12.013	105.719	194.749	-18.7845	0.43685	-0.00455878	1.929	1.01804	-0.145688	-0.493958	-0.876933	56.5	28.9535	1.35792	36.289	-15.3238	6.325	1.51658
W Scotland	L. hyperborea	The Greggs	2	533	Alasdair	56.4784	-5.51168	664	693	20.8	17.07.2018	15.8	27.09.2018	72	-5	13.8352	14.038	13.076	26.5271	51.8113	-24.0385	0.333868	-0.00361849	0.962	1.07049	-0.126726	-0.377025	0.946094	56.5	28.9535	1.35792	36.289	-15.3238	6.325	1.44985
W Scotland	L. hyperborea	The Greggs	2	534	Alasdair	56.4784	-5.51168	663	686	21.6	17.07.2018	14	27.09.2018	72	-7.6	13.8352	14.038	13.076	26.5271	51.8113	-35.1852	0.488683	-0.00569305	0.962	1.07049	-0.126726	-0.377025	0.946094	56.5	28.9535	1.35792	36.289	-15.3238	6.325	1.44985
W Scotland	L. hyperborea	Danger Reef	1	496	Alasdair	56.472	-5.46467	667	697	19.1	17.07.2018	16.7	29.08.2018	43	-2.4	13.0739	13.942	12.013	105.719	194.749	-12.5654	0.29222	-0.0029571	1.929	1.01804	-0.145688	-0.493958	-0.876933	56.5	28.9535	1.35792	36.289	-15.3238	6.325	1.51658
W Scotland	L. hyperborea	The Greggs	2	536	Alasdair	56.4784	-5.51168	663	717	19.5	17.07.2018	15.41	27.09.2018	72	-4.09	13.8352	14.038	13.076	26.5271	51.8113	-20.9744	0.291311	-0.00309075	0.962	1.07049	-0.126726	-0.377025	0.946094	56.5	28.9535	1.35792	36.289	-15.3238	6.325	1.44985
W Scotland	L. hyperborea	The Greggs	1	524	Alasdair	56.4784	-5.51168	663	692	21.7	17.07.2018	16.3	29.08.2018	43	-5.4	13.2139	14.134	12.207	179.304	246.791	-24.8848	0.578716	-0.00631764	1.927	1.05492	-0.156874	0.29429	0.997197	56.5	28.9535	1.35792	36.289	-15.3238	6.325	1.44836
W Scotland	L. hyperborea	Goat Island	1	512	Alasdair	56.5252	-5.46093	661	703	19.8	17.07.2018	14.6	29.08.2018	43	-5.2	13.1331	13.846	12.013	165.146	315.756	-26.2626	0.610759	-0.00669028	1.833	1.08097	-0.924452	-0.285198	-0.403224	56.5	28.9535	1.35792	36.289	-15.3238	6.325	1.61287
W Scotland	S. latissima	Danger Reef	1	491	Alasdair	56.472	-5.46467	665	676	21.2	17.07.2018	15.1	29.08.2018	43	-6.1	13.0739	13.942	12.013	105.719	194.749	-28.7736	0.669153	-0.00747147	1.929	1.01804	-0.145688	-0.493958	-0.876933	56.5	32.0433	1.28349	35.1735	-16.9175	5.94875	1.51658
W Scotland	S. latissima	The Greggs	2	532	Alasdair	56.4784	-5.51168	666	683	18.5	17.07.2018	12.14	27.09.2018	72	-6.36	13.8352	14.038	13.076	26.5271	51.8113	-34.3784	0.477477	-0.00548269	0.962	1.07049	-0.126726	-0.377025	0.946094	56.5	32.0433	1.28349	35.1735	-16.9175	5.94875	1.44985
W Scotland	S. latissima	Danger Reef	1	497	Alasdair	56.472	-5.46467	669	720	19.1	17.07.2018	16	29.08.2018	43	-3.1	13.0739	13.942	12.013	105.719	194.749	-16.2304	0.37745	-0.0038955	1.929	1.01804	-0.145688	-0.493958	-0.876933	56.5	32.0433	1.28349	35.1735	-16.9175	5.94875	1.51658
W Scotland	S. latissima	Goat Island	2	520	Alasdair	56.5252	-5.46093	662	688	20.4	17.07.2018	15.22	27.09.2018	72	-5.18	13.5421	13.942	12.883	9.3878	31.1279	-25.3922	0.352669	-0.00384925	1.059	0.986305	0.377028	0.786512	0.321625	56.5	32.0433	1.28349	35.1735	-16.9175	5.94875	1.48516
W Scotland	S. latissima	Danger Reef	1	495	Alasdair	56.472	-5.46467	669	708	20.2	17.07.2018	18.7	29.08.2018	43	-1.5	13.0739	13.942	12.013	105.719	194.749	-7.42574	0.172692	-0.00170657	1.929	1.01804	-0.145688	-0.493958	-0.876933	56.5	32.0433	1.28349	35.1735	-16.9175	5.94875	1.51658
W Scotland	S. latissima	Goat Island	1	509	Alasdair	56.5252	-5.46093	672	695	20.7	17.07.2018	15.4	29.08.2018	43	-5.3	13.1331	13.846	12.013	165.146	315.756	-25.6039	0.595439	-0.00651235	1.833	1.08097	-0.924452	-0.285198	-0.403224	56.5	32.0433	1.28349	35.1735	-16.9175	5.94875	1.61287
W Scotland	S. latissima	Goat Island	1	514	Alasdair	56.5252	-5.46093	662	702	20.4	17.07.2018	17.4	29.08.2018	43	-3	13.1331	13.846	12.013	165.146	315.756	-14.7059	0.341997	-0.00351256	1.833	1.08097	-0.924452	-0.285198	-0.403224	56.5	32.0433	1.28349	35.1735	-16.9175	5.94875	1.61287
W Scotland	S. latissima	Danger Reef	1	498	Alasdair	56.472	-5.46467	665	678	19.7	17.07.2018	10.7	29.08.2018	43	-9	13.0739	13.942	12.013	105.719	194.749	-45.6853	1.06245	-0.0132685	1.929	1.01804	-0.145688	-0.493958	-0.876933	56.5	32.0433	1.28349	35.1735	-16.9175	5.94875	1.51658
W Scotland	S. latissima	Danger Reef	2	499	Alasdair	56.472	-5.46467	669	710	19.7	17.07.2018	15	27.09.2018	72	-4.7	13.7867	14.038	13.269	11.8244	41.0216	-23.8579	0.331359	-0.00357701	0.769	1.01605	-0.154401	-0.526736	-0.85297	56.5	32.0433	1.28349	35.1735	-16.9175	5.94875	1.53411
W Scotland	S. latissima	Goat Island	1	513	Alasdair	56.5252	-5.46093	662	677	19.8	17.07.2018	18.03	29.08.2018	43	-1.77	13.1331	13.846	12.013	165.146	315.756	-8.93939	0.207893	-0.00206829	1.833	1.08097	-0.924452	-0.285198	-0.403224	56.5	32.0433	1.28349	35.1735	-16.9175	5.94875	1.61287
W Scotland	S. latissima	Goat Island	2	522	Alasdair	56.5252	-5.46093	662	673	18.4	17.07.2018	10.24	27.09.2018	72	-8.16	13.5421	13.942	12.883	9.3878	31.1279	-44.3478	0.615942	-0.00758048	1.059	0.986305	0.377028	0.786512	0.321625	56.5	32.0433	1.28349	35.1735	-16.9175	5.94875	1.48516
W Scotland	S. latissima	Danger Reef	2	502	Alasdair	56.472	-5.46467	665	709	20.4	17.07.2018	10.9	27.09.2018	72	-9.5	13.7867	14.038	13.269	11.8244	41.0216	-46.5686	0.646786	-0.00815073	0.769	1.01605	-0.154401	-0.526736	-0.85297	56.5	32.0433	1.28349	35.1735	-16.9175	5.94875	1.53411
W Scotland	S. latissima	Danger Reef	2	503	Alasdair	56.472	-5.46467	669	706	20.1	17.07.2018	16.19	27.09.2018	72	-3.91	13.7867	14.038	13.269	11.8244	41.0216	-19.4527	0.270177	-0.00284646	0.769	1.01605	-0.154401	-0.526736	-0.85297	56.5	32.0433	1.28349	35.1735	-16.9175	5.94875	1.53411
W Scotland	S. latissima	Danger Reef	2	504	Alasdair	56.472	-5.46467	665	674	21.1	17.07.2018	6.74	27.09.2018	72	-14.36	13.7867	14.038	13.269	11.8244	41.0216	-68.0569	0.945234	-0.0145719	0.769	1.01605	-0.154401	-0.526736	-0.85297	56.5	32.0433	1.28349	35.1735	-16.9175	5.94875	1.53411
W Scotland	S. latissima	The Greggs	1	526	Alasdair	56.4784	-5.51168	666	719	20.8	17.07.2018	15.05	29.08.2018	43	-5.75	13.2139	14.134	12.207	179.304	246.791	-27.6442	0.642889	-0.00712096	1.927	1.05492	-0.156874	0.29429	0.997197	56.5	32.0433	1.28349	35.1735	-16.9175	5.94875	1.44836
W Scotland	S. latissima	Goat Island	1	510	Alasdair	56.5252	-5.46093	672	691	21	17.07.2018	18.3	29.08.2018	43	-2.7	13.1331	13.846	12.013	165.146	315.756	-12.8571	0.299003	-0.00304505	1.833	1.08097	-0.924452	-0.285198	-0.403224	56.5	32.0433	1.28349	35.1735	-16.9175	5.94875	1.61287
W Scotland	S. latissima	The Greggs	2	537	Alasdair	56.4784	-5.51168	668	712	21.5	17.07.2018	17.01	27.09.2018	72	-4.49	13.8352	14.038	13.076	26.5271	51.8113	-20.8837	0.290052	-0.0030915	0.962	1.07049	-0.126726	-0.377025	0.946094	56.5	32.0433	1.28349	35.1735	-16.9175	5.94875	1.44985
W Scotland	S. latissima	The Greggs	1	525	Alasdair	56.4784	-5.51168	668	715	20.1	17.07.2018	11.9	29.08.2018	43	-8.2	13.2139	14.134	12.207	179.304	246.791	-40.796	0.948745	-0.0114429	1.927	1.05492	-0.156874	0.29429	0.997197	56.5	32.0433	1.28349	35.1735	-16.9175	5.94875	1.44836
W Scotland	S. latissima	Goat Island	2	517	Alasdair	56.5252	-5.46093	672	699	19.2	17.07.2018	14	27.09.2018	72	-5.2	13.5421	13.942	12.883	9.3878	31.1279	-27.0833	0.376157	-0.00413378	1.059	0.986305	0.377028	0.786512	0.321625	56.5	32.0433	1.28349	35.1735	-16.9175	5.94875	1.48516
W Scotland	S. latissima	The Greggs	2	535	Alasdair	56.4784	-5.51168	666	682	21.3	17.07.2018	6.9	27.09.2018	72	-14.4	13.8352	14.038	13.076	26.5271	51.8113	-67.6056	0.938967	-0.0144128	0.962	1.07049	-0.126726	-0.377025	0.946094	56.5	32.0433	1.28349	35.1735	-16.9175	5.94875	1.44985
W Scotland	S. latissima	The Greggs	1	523	Alasdair	56.4784	-5.51168	666	681	19.8	17.07.2018	14.6	29.08.2018	43	-5.2	13.2139	14.134	12.207	179.304	246.791	-26.2626	0.610759	-0.00669028	1.927	1.05492	-0.156874	0.29429	0.997197	56.5	32.0433	1.28349	35.1735	-16.9175	5.94875	1.44836
W Scotland	S. latissima	Goat Island	2	516	Alasdair	56.5252	-5.46093	672	675	20.3	17.07.2018	16.7	27.09.2018	72	-3.6	13.5421	13.942	12.883	9.3878	31.1279	-17.734	0.246305	-0.00257142	1.059	0.986305	0.377028	0.786512	0.321625	56.5	32.0433	1.28349	35.1735	-16.9175	5.94875	1.48516
W Scotland	S. latissima	The Greggs	2	538	Alasdair	56.4784	-5.51168	668	714	21	17.07.2018	15.47	27.09.2018	72	-5.53	13.8352	14.038	13.076	26.5271	51.8113	-26.3333	0.365741	-0.00402086	0.962	1.07049	-0.126726	-0.377025	0.946094	56.5	32.0433	1.28349	35.1735	-16.9175	5.94875	1.44985
W Scotland	S. latissima	The Greggs	1	530	Alasdair	56.4784	-5.51168	668	700	20.8	17.07.2018	16.1	29.08.2018	43	-4.7	13.2139	14.134	12.207	179.304	246.791	-22.5962	0.525492	-0.00564724	1.927	1.05492	-0.156874	0.29429	0.997197	56.5	32.0433	1.28349	35.1735	-16.9175	5.94875	1.44836
S Norway	L. hyperborea	S13	1	49	Filbee-Dexter	58.417	8.76258	315	358	16.57	24.08.2018	5.82	19.10.2018	56	10.75	16.6156	17.855	14.709	599.512	928.735	-64.8763	1.15851	-0.0168988	3.146	1.11705	-0.729368	-0.784703	0.290589	58.4	26.3421	1.41755	36.7485	-18.7037	5.77375	1.80466
S Norway	L. hyperborea	S3	1	65	Filbee-Dexter	58.396	8.73951	316	X4	12.4	25.08.2018	8.93	18.10.2018	54	3.47	15.7151	17.95	13.269	720.832	1051.98	-27.9839	0.51822	-0.00554989	4.681	1.038	0.116655	0.066547	1.02411	58.4	26.3421	1.41755	36.7485	-18.7037	5.77375	1.20731
S Norway	L. hyperborea	S13	2	57	Filbee-Dexter	58.417	8.76258	315	341	20.77	24.08.2018	17.7	06.11.2018	73	3.07	13.2019	15.473	10.455	304.115	503.355	-14.7809	0.202479	-0.00208232	5.018	1.14813	-0.993777	-0.48617	-0.29613	58.4	26.3421	1.41755	36.7485	-18.7037	5.77375	1.77608
S Norway	L. hyperborea	S13	2	63	Filbee-Dexter	58.417	8.76258	314	354	17.45	24.08.2018	16.63	06.11.2018	73	0.82	13.2019	15.473	10.455	304.115	503.355	-4.69914	0.0643718	-0.000622772	5.018	1.14813	-0.993777	-0.48617	-0.29613	58.4	26.3421	1.41755	36.7485	-18.7037	5.77375	1.77608
S Norway	L. hyperborea	S3	1	68	Filbee-Dexter	58.396	8.73951	312	352	18.02	25.08.2018	17.2	18.10.2018	54	0.82	15.7151	17.95	13.269	720.832	1051.98	-4.5505	0.0842685	-0.000816101	4.681	1.038	0.116655	0.066547	1.02411	58.4	26.3421	1.41755	36.7485	-18.7037	5.77375	1.20731
S Norway	L. hyperborea	S13	2	60	Filbee-Dexter	58.417	8.76258	315	360	16.18	24.08.2018	1.38	06.11.2018	73	14.8	13.2019	15.473	10.455	304.115	503.355	-91.471	1.25303	-0.0270773	5.018	1.14813	-0.993777	-0.48617	-0.29613	58.4	26.3421	1.41755	36.7485	-18.7037	5.77375	1.77608
S Norway	L. hyperborea	S13	1	52	Filbee-Dexter	58.417	8.76258	315	357	13.2	24.08.2018	11.92	19.10.2018	56	1.28	16.6156	17.855	14.709	599.512	928.735	-9.69697	0.17316	-0.00168688	3.146	1.11705	-0.729368	-0.784703	0.290589	58.4	26.3421	1.41755	36.7485	-18.7037	5.77375	1.80466
S Norway	L. hyperborea	S3	2	79	Filbee-Dexter	58.396	8.73951	312	359	18.08	25.08.2018	7.39	06.11.2018	73	10.69	11.9197	13.461	10.553	240.364	415.565	-59.1261	0.809947	-0.0112548	2.908	1.07197	-0.228691	-0.0875536	1.03298	58.4	26.3421	1.41755	36.7485	-18.7037	5.77375	1.34922
S Norway	L. hyperborea	S5	1	82	Filbee-Dexter	58.5028	8.88807	327	308	11.22	25.08.2018	9.78	19.10.2018	55	1.44	15.6469	17.76	13.461	311.161	448.365	-12.8342	0.23335	-0.00227966	4.299	1.11705	-0.729368	-0.784703	0.290589	58.4	26.3421	1.41755	36.7485	-18.7037	5.77375	1.80466
S Norway	L. hyperborea	S3	2	73	Filbee-Dexter	58.396	8.73951	316	X3	10.16	25.08.2018	8.11	06.11.2018	73	2.05	11.9197	13.461	10.553	240.364	415.565	-20.1772	0.2764	-0.00278032	2.908	1.07197	-0.228691	-0.0875536	1.03298	58.4	26.3421	1.41755	36.7485	-18.7037	5.77375	1.34922
S Norway	L. hyperborea	S3	1	66	Filbee-Dexter	58.396	8.73951	316	X5	15.02	25.08.2018	12.26	18.10.2018	54	2.76	15.7151	17.95	13.269	720.832	1051.98	-18.3755	0.340287	-0.00350159	4.681	1.038	0.116655	0.066547	1.02411	58.4	26.3421	1.41755	36.7485	-18.7037	5.77375	1.20731
S Norway	L. hyperborea	S3	1	71	Filbee-Dexter	58.396	8.73951	312	342	16.3	25.08.2018	10.73	18.10.2018	54	5.57	15.7151	17.95	13.269	720.832	1051.98	-34.1718	0.632811	-0.0071955	4.681	1.038	0.116655	0.066547	1.02411	58.4	26.3421	1.41755	36.7485	-18.7037	5.77375	1.20731
S Norway	L. hyperborea	S5	1	85	Filbee-Dexter	58.5028	8.88807	327	326	11.73	25.08.2018	10.1	19.10.2018	55	1.63	15.6469	17.76	13.461	311.161	448.365	-13.896	0.252654	-0.00249121	4.299	1.11705	-0.729368	-0.784703	0.290589	58.4	26.3421	1.41755	36.7485	-18.7037	5.77375	1.80466
S Norway	L. hyperborea	S3	2	76	Filbee-Dexter	58.396	8.73951	312	345	12.93	25.08.2018	12.76	06.11.2018	73	0.17	11.9197	13.461	10.553	240.364	415.565	-1.31477	0.0180106	-0.000168205	2.908	1.07197	-0.228691	-0.0875536	1.03298	58.4	26.3421	1.41755	36.7485	-18.7037	5.77375	1.34922
S Norway	L. hyperborea	S5	1	88	Filbee-Dexter	58.5028	8.88807	330	329	19.35	25.08.2018	4.9	19.10.2018	55	14.45	15.6469	17.76	13.461	311.161	448.365	-74.677	1.35776	-0.0225114	4.299	1.11705	-0.729368	-0.784703	0.290589	58.4	26.3421	1.41755	36.7485	-18.7037	5.77375	1.80466
S Norway	L. hyperborea	S13	2	61	Filbee-Dexter	58.417	8.76258	314	356	23.62	24.08.2018	7.12	06.11.2018	73	16.5	13.2019	15.473	10.455	304.115	503.355	-69.8561	0.956932	-0.0151949	5.018	1.14813	-0.993777	-0.48617	-0.29613	58.4	26.3421	1.41755	36.7485	-18.7037	5.77375	1.77608
S Norway	L. hyperborea	S5	2	96	Filbee-Dexter	58.5028	8.88807	330	347	18.06	25.08.2018	7.22	08.11.2018	73	10.84	11.8057	13.75	10.357	94.1214	160.408	-60.0221	0.822221	-0.0115208	3.393	1.14813	-0.993777	-0.48617	-0.29613	58.4	26.3421	1.41755	36.7485	-18.7037	5.77375	1.77608
S Norway	L. hyperborea	S5	2	91	Filbee-Dexter	58.5028	8.88807	327	X2	11.34	25.08.2018	10.62	08.11.2018	73	0.72	11.8057	13.75	10.357	94.1214	160.408	-6.34921	0.0869754	-0.000823538	3.393	1.14813	-0.993777	-0.48617	-0.29613	58.4	26.3421	1.41755	36.7485	-18.7037	5.77375	1.77608
S Norway	L. hyperborea	S5	2	92	Filbee-Dexter	58.5028	8.88807	327	325	9.38	25.08.2018	3.27	08.11.2018	73	6.11	11.8057	13.75	10.357	94.1214	160.408	-65.1386	0.892309	-0.012168	3.393	1.14813	-0.993777	-0.48617	-0.29613	58.4	26.3421	1.41755	36.7485	-18.7037	5.77375	1.77608
S Norway	L. hyperborea	S13	1	51	Filbee-Dexter	58.417	8.76258	314	355	21.39	24.08.2018	13.94	19.10.2018	56	7.45	16.6156	17.855	14.709	599.512	928.735	-34.8294	0.621953	-0.0072245	3.146	1.11705	-0.729368	-0.784703	0.290589	58.4	26.3421	1.41755	36.7485	-18.7037	5.77375	1.80466
S Norway	L. hyperborea	S13	1	56	Filbee-Dexter	58.417	8.76258	314	344	14.38	24.08.2018	11.62	19.10.2018	56	2.76	16.6156	17.855	14.709	599.512	928.735	-19.1933	0.342738	-0.00353188	3.146	1.11705	-0.729368	-0.784703	0.290589	58.4	26.3421	1.41755	36.7485	-18.7037	5.77375	1.80466
S Norway	L. hyperborea	S5	2	95	Filbee-Dexter	58.5028	8.88807	330	323	11.65	25.08.2018	9.84	08.11.2018	73	1.81	11.8057	13.75	10.357	94.1214	160.408	-15.5365	0.212829	-0.00211526	3.393	1.14813	-0.993777	-0.48617	-0.29613	58.4	26.3421	1.41755	36.7485	-18.7037	5.77375	1.77608
S Norway	L. hyperborea	S5	1	87	Filbee-Dexter	58.5028	8.88807	330	324	11.03	25.08.2018	10.66	19.10.2018	55	0.37	15.6469	17.76	13.461	311.161	448.365	-3.35449	0.0609907	-0.000567988	4.299	1.11705	-0.729368	-0.784703	0.290589	58.4	26.3421	1.41755	36.7485	-18.7037	5.77375	1.80466
S Norway	L. hyperborea	S3	2	75	Filbee-Dexter	58.396	8.73951	316	X1	15.03	25.08.2018	9.52	06.11.2018	73	5.51	11.9197	13.461	10.553	240.364	415.565	-36.66	0.502192	-0.00576964	2.908	1.07197	-0.228691	-0.0875536	1.03298	58.4	26.3421	1.41755	36.7485	-18.7037	5.77375	1.34922
S Norway	S. latissima	S13	1	50	Filbee-Dexter	58.417	8.76258	311	337	19.11	24.08.2018	6.35	19.10.2018	56	12.76	16.6156	17.855	14.709	599.512	928.735	-66.7713	1.19235	-0.0179735	3.146	1.11705	-0.729368	-0.784703	0.290589	58.4	36.5098	1.05704	37.0782	-17.235	6.65125	1.80466
S Norway	S. latissima	S3	2	78	Filbee-Dexter	58.396	8.73951	313	328	22.87	25.08.2018	10.28	06.11.2018	73	12.59	11.9197	13.461	10.553	240.364	415.565	-55.0503	0.754113	-0.0102684	2.908	1.07197	-0.228691	-0.0875536	1.03298	58.4	36.5098	1.05704	37.0782	-17.235	6.65125	1.34922
S Norway	S. latissima	S13	2	62	Filbee-Dexter	58.417	8.76258	311	353	21.26	24.08.2018	9.13	06.11.2018	73	12.13	13.2019	15.473	10.455	304.115	503.355	-57.0555	0.781582	-0.0107848	5.018	1.14813	-0.993777	-0.48617	-0.29613	58.4	36.5098	1.05704	37.0782	-17.235	6.65125	1.77608
S Norway	S. latissima	S5	2	93	Filbee-Dexter	58.5028	8.88807	317	332	13.86	25.08.2018	13.64	08.11.2018	73	0.22	11.8057	13.75	10.357	94.1214	160.408	-1.5873	0.0217439	-0.000204322	3.393	1.14813	-0.993777	-0.48617	-0.29613	58.4	36.5098	1.05704	37.0782	-17.235	6.65125	1.77608
S Norway	S. latissima	S5	2	90	Filbee-Dexter	58.5028	8.88807	318	339	15.18	25.08.2018	14	08.11.2018	73	1.18	11.8057	13.75	10.357	94.1214	160.408	-7.77339	0.106485	-0.00103734	3.393	1.14813	-0.993777	-0.48617	-0.29613	58.4	36.5098	1.05704	37.0782	-17.235	6.65125	1.77608
S Norway	S. latissima	S13	1	53	Filbee-Dexter	58.417	8.76258	320	350	20.7	24.08.2018	13.09	19.10.2018	56	7.61	16.6156	17.855	14.709	599.512	928.735	-36.7633	0.656487	-0.00771155	3.146	1.11705	-0.729368	-0.784703	0.290589	58.4	36.5098	1.05704	37.0782	-17.235	6.65125	1.80466
S Norway	S. latissima	S13	1	54	Filbee-Dexter	58.417	8.76258	311	343	18.23	24.08.2018	15.64	19.10.2018	56	2.59	16.6156	17.855	14.709	599.512	928.735	-14.2074	0.253703	-0.00258325	3.146	1.11705	-0.729368	-0.784703	0.290589	58.4	36.5098	1.05704	37.0782	-17.235	6.65125	1.80466
S Norway	S. latissima	S13	2	59	Filbee-Dexter	58.417	8.76258	320	349	16.58	24.08.2018	12.12	06.11.2018	73	4.46	13.2019	15.473	10.455	304.115	503.355	-26.8999	0.368491	-0.00400855	5.018	1.14813	-0.993777	-0.48617	-0.29613	58.4	36.5098	1.05704	37.0782	-17.235	6.65125	1.77608
S Norway	S. latissima	S13	2	58	Filbee-Dexter	58.417	8.76258	320	348	19.06	24.08.2018	14.18	06.11.2018	73	4.88	13.2019	15.473	10.455	304.115	503.355	-25.6034	0.350731	-0.00381848	5.018	1.14813	-0.993777	-0.48617	-0.29613	58.4	36.5098	1.05704	37.0782	-17.235	6.65125	1.77608
S Norway	S. latissima	S5	1	83	Filbee-Dexter	58.5028	8.88807	317	346	18.71	25.08.2018	14.97	19.10.2018	55	3.74	15.6469	17.76	13.461	311.161	448.365	-19.9893	0.363442	-0.00382571	4.299	1.11705	-0.729368	-0.784703	0.290589	58.4	36.5098	1.05704	37.0782	-17.235	6.65125	1.80466
S Norway	S. latissima	S13	1	55	Filbee-Dexter	58.417	8.76258	320	321	15.67	24.08.2018	6.11	19.10.2018	56	9.56	16.6156	17.855	14.709	599.512	928.735	-61.0083	1.08943	-0.0152162	3.146	1.11705	-0.729368	-0.784703	0.290589	58.4	36.5098	1.05704	37.0782	-17.235	6.65125	1.80466
S Norway	S. latissima	S13	2	64	Filbee-Dexter	58.417	8.76258	311	351	20.3	24.08.2018	6.72	06.11.2018	73	13.58	13.2019	15.473	10.455	304.115	503.355	-66.8966	0.916391	-0.0139026	5.018	1.14813	-0.993777	-0.48617	-0.29613	58.4	36.5098	1.05704	37.0782	-17.235	6.65125	1.77608
S Norway	S. latissima	S3	2	77	Filbee-Dexter	58.396	8.73951	319	335	12.15	25.08.2018	7.37	06.11.2018	73	4.78	11.9197	13.461	10.553	240.364	415.565	-39.3416	0.538926	-0.0061886	2.908	1.07197	-0.228691	-0.0875536	1.03298	58.4	36.5098	1.05704	37.0782	-17.235	6.65125	1.34922
S Norway	S. latissima	S5	2	89	Filbee-Dexter	58.5028	8.88807	317	331	20.33	25.08.2018	9.91	08.11.2018	73	10.42	11.8057	13.75	10.357	94.1214	160.408	-51.2543	0.702114	-0.00918404	3.393	1.14813	-0.993777	-0.48617	-0.29613	58.4	36.5098	1.05704	37.0782	-17.235	6.65125	1.77608
S Norway	S. latissima	S3	1	67	Filbee-Dexter	58.396	8.73951	313	306	16.32	25.08.2018	10.58	18.10.2018	54	5.74	15.7151	17.95	13.269	720.832	1051.98	-35.1716	0.651325	-0.00745523	4.681	1.038	0.116655	0.066547	1.02411	58.4	36.5098	1.05704	37.0782	-17.235	6.65125	1.20731
S Norway	S. latissima	S3	2	80	Filbee-Dexter	58.396	8.73951	319	322	15.63	25.08.2018	11.78	06.11.2018	73	3.85	11.9197	13.461	10.553	240.364	415.565	-24.6321	0.337426	-0.00360722	2.908	1.07197	-0.228691	-0.0875536	1.03298	58.4	36.5098	1.05704	37.0782	-17.235	6.65125	1.34922
S Norway	S. latissima	S3	1	69	Filbee-Dexter	58.396	8.73951	313	305	15.09	25.08.2018	6.67	18.10.2018	54	8.42	15.7151	17.95	13.269	720.832	1051.98	-55.7985	1.03331	-0.01372	4.681	1.038	0.116655	0.066547	1.02411	58.4	36.5098	1.05704	37.0782	-17.235	6.65125	1.20731
S Norway	S. latissima	S3	2	74	Filbee-Dexter	58.396	8.73951	313	307	16.83	25.08.2018	1.21	06.11.2018	73	15.62	11.9197	13.461	10.553	240.364	415.565	-92.8105	1.27138	-0.0286012	2.908	1.07197	-0.228691	-0.0875536	1.03298	58.4	36.5098	1.05704	37.0782	-17.235	6.65125	1.34922
S Norway	S. latissima	S5	1	84	Filbee-Dexter	58.5028	8.88807	318	340	22.47	25.08.2018	19.15	19.10.2018	55	3.32	15.6469	17.76	13.461	311.161	448.365	-14.7753	0.268641	-0.00277307	4.299	1.11705	-0.729368	-0.784703	0.290589	58.4	36.5098	1.05704	37.0782	-17.235	6.65125	1.80466
S Norway	S. latissima	S3	1	72	Filbee-Dexter	58.396	8.73951	319	336	20.12	25.08.2018	4.82	18.10.2018	54	15.3	15.7151	17.95	13.269	720.832	1051.98	-76.0437	1.40822	-0.0238689	4.681	1.038	0.116655	0.066547	1.02411	58.4	36.5098	1.05704	37.0782	-17.235	6.65125	1.20731
S Norway	S. latissima	S5	1	86	Filbee-Dexter	58.5028	8.88807	318	241	20.35	25.08.2018	16.79	19.10.2018	55	3.56	15.6469	17.76	13.461	311.161	448.365	-17.4939	0.31807	-0.00331664	4.299	1.11705	-0.729368	-0.784703	0.290589	58.4	36.5098	1.05704	37.0782	-17.235	6.65125	1.80466
S Norway	S. latissima	S3	1	70	Filbee-Dexter	58.396	8.73951	319	338	15.92	25.08.2018	7.2	18.10.2018	54	8.72	15.7151	17.95	13.269	720.832	1051.98	-54.7739	1.01433	-0.0134141	4.681	1.038	0.116655	0.066547	1.02411	58.4	36.5098	1.05704	37.0782	-17.235	6.65125	1.20731
S Norway	S. latissima	S5	1	81	Filbee-Dexter	58.5028	8.88807	317	333	20.64	25.08.2018	12.88	19.10.2018	55	7.76	15.6469	17.76	13.461	311.161	448.365	-37.5969	0.68358	-0.00807445	4.299	1.11705	-0.729368	-0.784703	0.290589	58.4	36.5098	1.05704	37.0782	-17.235	6.65125	1.80466
S Norway	S. latissima	S5	2	94	Filbee-Dexter	58.5028	8.88807	318	334	16.83	25.08.2018	12.32	08.11.2018	73	4.51	11.8057	13.75	10.357	94.1214	160.408	-26.7974	0.367087	-0.00399474	3.393	1.14813	-0.993777	-0.48617	-0.29613	58.4	36.5098	1.05704	37.0782	-17.235	6.65125	1.77608
Alaska	S. latissima	Jakolof	2	48	Konar	59.4684	-151.538	2	19	20.5	30.05.2018	0	06.09.2018	98.78	20.5	10.6747	12.497	8.879	10.2513	3.04848	-100	1.01235	-0.0310595	3.618	1.00953	-0.0487848	-0.645928	-0.770455	59.5	15.4196	1.97391	29.4802	-14.6746	7.98333	1.46517
Alaska	S. latissima	Herring	1	2	Konar	59.4811	-151.522	7	44	21.7	30.05.2018	23.7	09.07.2018	39.89	-2	8.27276	12.594	6.37	80.1847	18.5386	9.21659	-0.23105	0.00211678	6.224	1.05559	-0.706384	0.153547	-0.761594	59.5	15.4196	1.97391	29.4802	-14.6746	7.98333	1.62153
Alaska	S. latissima	Herring	2	16	Konar	59.4811	-151.522	5	37	21.5	30.05.2018	14.3	06.09.2018	98.86	7.2	10.2269	12.207	8.481	142.494	67.905	-33.4884	0.338745	-0.0039011	3.726	1.04765	-0.704918	0.188267	-0.750542	59.5	15.4196	1.97391	29.4802	-14.6746	7.98333	1.64373
Alaska	S. latissima	Herring	2	11	Konar	59.4811	-151.522	5	36	19	30.05.2018	5.5	06.09.2018	98.86	13.5	10.2269	12.207	8.481	142.494	67.905	-71.0526	0.71872	-0.0113689	3.726	1.04765	-0.704918	0.188267	-0.750542	59.5	15.4196	1.97391	29.4802	-14.6746	7.98333	1.64373
Alaska	S. latissima	Hesketh	2	26	Konar	59.5072	-151.549	9	59	20.9	30.05.2018	0	06.09.2018	98.8	20.9	10.1836	12.207	8.68	35.271	5.7118	-100	1.01215	-0.0312397	3.527	1.05258	-0.726089	-0.200476	-0.710807	59.5	15.4196	1.97391	29.4802	-14.6746	7.98333	1.63737
Alaska	S. latissima	Herring	1	6	Konar	59.4811	-151.522	7	45	18.8	30.05.2018	20.8	09.07.2018	39.89	-2	8.27276	12.594	6.37	80.1847	18.5386	10.6383	-0.266691	0.00241233	6.224	1.05559	-0.706384	0.153547	-0.761594	59.5	15.4196	1.97391	29.4802	-14.6746	7.98333	1.62153
Alaska	S. latissima	Jakolof	1	37	Konar	59.4684	-151.538	3	29	21.6	30.05.2018	15.4	09.07.2018	39.77	6.2	8.8377	13.173	6.978	13.7432	4.18	-28.7037	0.721743	-0.00806308	6.195	1.01561	0.0442142	-0.97817	-0.26135	59.5	15.4196	1.97391	29.4802	-14.6746	7.98333	1.28373
Alaska	S. latissima	Hesketh	1	19	Konar	59.5072	-151.549	11	49	21.4	30.05.2018	26.2	09.07.2018	39.89	-4.8	8.20918	11.041	6.471	116.577	14.4876	22.4299	-0.562294	0.00486729	4.57	1.03538	-0.57698	-0.278013	-0.811944	59.5	15.4196	1.97391	29.4802	-14.6746	7.98333	1.66694
Alaska	S. latissima	Jakolof	1	33	Konar	59.4684	-151.538	3	26	22.9	30.05.2018	24.4	09.07.2018	39.77	-1.5	8.8377	13.173	6.978	13.7432	4.18	6.55022	-0.164702	0.00153057	6.195	1.01561	0.0442142	-0.97817	-0.26135	59.5	15.4196	1.97391	29.4802	-14.6746	7.98333	1.28373
Alaska	S. latissima	Hesketh	1	17	Konar	59.5072	-151.549	11	47	21.7	30.05.2018	26.6	09.07.2018	39.89	-4.9	8.20918	11.041	6.471	116.577	14.4876	22.5806	-0.566073	0.00489975	4.57	1.03538	-0.57698	-0.278013	-0.811944	59.5	15.4196	1.97391	29.4802	-14.6746	7.98333	1.66694
Alaska	S. latissima	Herring	2	15	Konar	59.4811	-151.522	5	34	21.8	30.05.2018	24.7	06.09.2018	98.86	-2.9	10.2269	12.207	8.481	142.494	67.905	13.3028	-0.134562	0.00121111	3.726	1.04765	-0.704918	0.188267	-0.750542	59.5	15.4196	1.97391	29.4802	-14.6746	7.98333	1.64373
Alaska	S. latissima	Jakolof	2	47	Konar	59.4684	-151.538	2	20	20.1	30.05.2018	0	06.09.2018	98.78	20.1	10.6747	12.497	8.879	10.2513	3.04848	-100	1.01235	-0.0308693	3.618	1.00953	-0.0487848	-0.645928	-0.770455	59.5	15.4196	1.97391	29.4802	-14.6746	7.98333	1.46517
Alaska	S. latissima	Hesketh	2	32	Konar	59.5072	-151.549	9	60	22.5	30.05.2018	25.8	06.09.2018	98.8	-3.3	10.1836	12.207	8.68	35.271	5.7118	14.6667	-0.148448	0.00132997	3.527	1.05258	-0.726089	-0.200476	-0.710807	59.5	15.4196	1.97391	29.4802	-14.6746	7.98333	1.63737
Alaska	S. latissima	Jakolof	2	42	Konar	59.4684	-151.538	2	18	21.1	30.05.2018	3.6	06.09.2018	98.78	17.5	10.6747	12.497	8.879	10.2513	3.04848	-82.9384	0.839627	-0.0158891	3.618	1.00953	-0.0487848	-0.645928	-0.770455	59.5	15.4196	1.97391	29.4802	-14.6746	7.98333	1.46517
Alaska	S. latissima	Jakolof	1	36	Konar	59.4684	-151.538	3	28	22.8	30.05.2018	24.3	09.07.2018	39.77	-1.5	8.8377	13.173	6.978	13.7432	4.18	6.57895	-0.165425	0.00153681	6.195	1.01561	0.0442142	-0.97817	-0.26135	59.5	15.4196	1.97391	29.4802	-14.6746	7.98333	1.28373
Alaska	S. latissima	Herring	1	7	Konar	59.4811	-151.522	7	43	18	30.05.2018	20.1	09.07.2018	39.89	-2.1	8.27276	12.594	6.37	80.1847	18.5386	11.6667	-0.292471	0.00262808	6.224	1.05559	-0.706384	0.153547	-0.761594	59.5	15.4196	1.97391	29.4802	-14.6746	7.98333	1.62153
Alaska	S. latissima	Herring	1	4	Konar	59.4811	-151.522	7	42	20.1	30.05.2018	23.7	09.07.2018	39.89	-3.6	8.27276	12.594	6.37	80.1847	18.5386	17.9104	-0.448996	0.00394912	6.224	1.05559	-0.706384	0.153547	-0.761594	59.5	15.4196	1.97391	29.4802	-14.6746	7.98333	1.62153
Alaska	S. latissima	Hesketh	2	28	Konar	59.5072	-151.549	9	58	19.3	30.05.2018	3.8	06.09.2018	98.8	15.5	10.1836	12.207	8.68	35.271	5.7118	-80.3109	0.812863	-0.0145952	3.527	1.05258	-0.726089	-0.200476	-0.710807	59.5	15.4196	1.97391	29.4802	-14.6746	7.98333	1.63737
Alaska	S. latissima	Herring	2	12	Konar	59.4811	-151.522	5	35	22.5	30.05.2018	20.2	06.09.2018	98.86	2.3	10.2269	12.207	8.481	142.494	67.905	-10.2222	0.103401	-0.00104187	3.726	1.04765	-0.704918	0.188267	-0.750542	59.5	15.4196	1.97391	29.4802	-14.6746	7.98333	1.64373
Alaska	S. latissima	Jakolof	1	39	Konar	59.4684	-151.538	3	27	21.1	30.05.2018	21.5	09.07.2018	39.77	-0.4	8.8377	13.173	6.978	13.7432	4.18	1.89573	-0.0476675	0.000451036	6.195	1.01561	0.0442142	-0.97817	-0.26135	59.5	15.4196	1.97391	29.4802	-14.6746	7.98333	1.28373
Alaska	S. latissima	Hesketh	1	21	Konar	59.5072	-151.549	11	21	18	30.05.2018	19.8	09.07.2018	39.89	-1.8	8.20918	11.041	6.471	116.577	14.4876	10	-0.250689	0.00226909	4.57	1.03538	-0.57698	-0.278013	-0.811944	59.5	15.4196	1.97391	29.4802	-14.6746	7.98333	1.66694
Alaska	S. latissima	Jakolof	2	45	Konar	59.4684	-151.538	2	17	21.9	30.05.2018	0	06.09.2018	98.78	21.9	10.6747	12.497	8.879	10.2513	3.04848	-100	1.01235	-0.0316981	3.618	1.00953	-0.0487848	-0.645928	-0.770455	59.5	15.4196	1.97391	29.4802	-14.6746	7.98333	1.46517
Alaska	S. latissima	Hesketh	2	29	Konar	59.5072	-151.549	9	8	20.1	30.05.2018	22.5	06.09.2018	98.8	-2.4	10.1836	12.207	8.68	35.271	5.7118	11.9403	-0.120853	0.00109036	3.527	1.05258	-0.726089	-0.200476	-0.710807	59.5	15.4196	1.97391	29.4802	-14.6746	7.98333	1.63737
Alaska	S. latissima	Hesketh	1	18	Konar	59.5072	-151.549	11	46	18.6	30.05.2018	20.6	09.07.2018	39.89	-2	8.20918	11.041	6.471	116.577	14.4876	10.7527	-0.269558	0.00243579	4.57	1.03538	-0.57698	-0.278013	-0.811944	59.5	15.4196	1.97391	29.4802	-14.6746	7.98333	1.66694
N Norway	L. hyperborea	Mortens Site	1	313	Filbee-Dexter	69.6307	17.9442	295	267	13.58	12.05.2018	19.3	03.07.2018	52	-5.72	6.458	8.08	4.52	97.6617		42.1208	-0.810015	0.00636481	3.045	1.09157	-0.514346	-0.382376	0.712662	69.6	18.9497	1.63617	30.8777	-18.07	3.15	1.60938
N Norway	L. hyperborea	Edoya	2	291	Filbee-Dexter	69.6094	17.908	296	279	11.78	12.05.2018	14.8	10.09.2018	121	-3.02	9.53603	12.3039	6.775	79.0635	12.7274	25.6367	-0.211873	0.00175313	5.52889	1.07174	-0.761148	-0.016417	0.525804	69.6	18.9497	1.63617	30.8777	-18.07	3.15	1.30337
N Norway	L. hyperborea	Edoya	2	293	Filbee-Dexter	69.6094	17.908	296	278	11	12.05.2018	14.2	10.09.2018	121	-3.2	9.53603	12.3039	6.775	79.0635	12.7274	29.0909	-0.240421	0.00195363	5.52889	1.07174	-0.761148	-0.016417	0.525804	69.6	18.9497	1.63617	30.8777	-18.07	3.15	1.30337
N Norway	L. hyperborea	Lost chain	1	300	Filbee-Dexter	69.6126	17.917	271	247	14.11	12.05.2018	17.9	03.07.2018	52	-3.79	6.458	8.08	4.52	97.6617		26.8604	-0.516546	0.00430395	3.045	1.09157	-0.514346	-0.382376	0.712662	69.6	18.9497	1.63617	30.8777	-18.07	3.15	1.60938
N Norway	L. hyperborea	Edoya	2	288	Filbee-Dexter	69.6094	17.908	270	282	17.14	12.05.2018	24	10.09.2018	121	-6.86	9.53603	12.3039	6.775	79.0635	12.7274	40.0233	-0.330771	0.00265088	5.52889	1.07174	-0.761148	-0.016417	0.525804	69.6	18.9497	1.63617	30.8777	-18.07	3.15	1.30337
N Norway	L. hyperborea	Mortens Site	1	314	Filbee-Dexter	69.6307	17.9442	295	265	12.57	12.05.2018	18.5	03.07.2018	52	-5.93	6.458	8.08	4.52	97.6617		47.1758	-0.907227	0.00697217	3.045	1.09157	-0.514346	-0.382376	0.712662	69.6	18.9497	1.63617	30.8777	-18.07	3.15	1.60938
N Norway	L. hyperborea	Mortens Site	1	313	Filbee-Dexter	69.6307	17.9442	295	267	13.58	12.05.2018	19.3	03.07.2018	52	-5.72	6.458	8.08	4.52	97.6617		42.1208	-0.810015	0.00636481	3.045	1.09157	-0.514346	-0.382376	0.712662	69.6	18.9497	1.63617	30.8777	-18.07	3.15	1.60938
N Norway	L. hyperborea	Edoya	2	283	Filbee-Dexter	69.6094	17.908	270	284	13.6	12.05.2018	18.6	10.09.2018	121	-5	9.53603	12.3039	6.775	79.0635	12.7274	36.7647	-0.303841	0.00243395	5.52889	1.07174	-0.761148	-0.016417	0.525804	69.6	18.9497	1.63617	30.8777	-18.07	3.15	1.30337
N Norway	L. hyperborea	Edoya	2	284	Filbee-Dexter	69.6094	17.908	296	280	11.73	12.05.2018	7.2	10.09.2018	121	4.53	9.53603	12.3039	6.775	79.0635	12.7274	-38.6189	0.319165	-0.00363494	5.52889	1.07174	-0.761148	-0.016417	0.525804	69.6	18.9497	1.63617	30.8777	-18.07	3.15	1.30337
N Norway	L. hyperborea	Mortens Site	1	309	Filbee-Dexter	69.6307	17.9442	293	261	11.05	12.05.2018	10.1	03.07.2018	52	0.95	6.458	8.08	4.52	97.6617		-8.59729	0.165332	-0.00157922	3.045	1.09157	-0.514346	-0.382376	0.712662	69.6	18.9497	1.63617	30.8777	-18.07	3.15	1.60938
N Norway	L. hyperborea	Mortens Site	1	309	Filbee-Dexter	69.6307	17.9442	293	261	11.05	12.05.2018	10.1	03.07.2018	52	0.95	6.458	8.08	4.52	97.6617		-8.59729	0.165332	-0.00157922	3.045	1.09157	-0.514346	-0.382376	0.712662	69.6	18.9497	1.63617	30.8777	-18.07	3.15	1.60938
N Norway	L. hyperborea	Mortens Site	1	310	Filbee-Dexter	69.6307	17.9442	293	263	17	12.05.2018	21.7	03.07.2018	52	-4.7	6.458	8.08	4.52	97.6617		27.6471	-0.531674	0.00446141	3.045	1.09157	-0.514346	-0.382376	0.712662	69.6	18.9497	1.63617	30.8777	-18.07	3.15	1.60938
N Norway	L. hyperborea	Mortens Site	1	310	Filbee-Dexter	69.6307	17.9442	293	263	17	12.05.2018	21.7	03.07.2018	52	-4.7	6.458	8.08	4.52	97.6617		27.6471	-0.531674	0.00446141	3.045	1.09157	-0.514346	-0.382376	0.712662	69.6	18.9497	1.63617	30.8777	-18.07	3.15	1.60938
N Norway	L. hyperborea	Mortens Site	2	322	Filbee-Dexter	69.6307	17.9442	295	266	11.75	12.05.2018	20.3	10.09.2018	121	-8.55	10.178	12.98	6.78	97.6617		72.766	-0.601372	0.00424112	5.801	1.07174	-0.761148	-0.016417	0.525804	69.6	18.9497	1.63617	30.8777	-18.07	3.15	1.30337
N Norway	L. hyperborea	Lost chain	2	306	Filbee-Dexter	69.6126	17.917	299	258	20.33	12.05.2018	37.7	10.09.2018	121	-17.37	10.178	12.98	6.78	97.6617		85.4402	-0.706118	0.00492335	5.801	1.07174	-0.761148	-0.016417	0.525804	69.6	18.9497	1.63617	30.8777	-18.07	3.15	1.30337
N Norway	L. hyperborea	Edoya	2	295	Filbee-Dexter	69.6094	17.908	296	277	10.36	12.05.2018	12.8	10.09.2018	121	-2.44	9.53603	12.3039	6.775	79.0635	12.7274	23.5521	-0.194646	0.00160802	5.52889	1.07174	-0.761148	-0.016417	0.525804	69.6	18.9497	1.63617	30.8777	-18.07	3.15	1.30337
N Norway	L. hyperborea	Lost chain	2	305	Filbee-Dexter	69.6126	17.917	299	258	20.33	12.05.2018	37.7	10.09.2018	121	-17.37	10.178	12.98	6.78	97.6617		85.4402	-0.706118	0.00492335	5.801	1.07174	-0.761148	-0.016417	0.525804	69.6	18.9497	1.63617	30.8777	-18.07	3.15	1.30337
N Norway	L. hyperborea	Mortens Site	1	314	Filbee-Dexter	69.6307	17.9442	295	265	12.57	12.05.2018	18.5	03.07.2018	52	-5.93	6.458	8.08	4.52	97.6617		47.1758	-0.907227	0.00697217	3.045	1.09157	-0.514346	-0.382376	0.712662	69.6	18.9497	1.63617	30.8777	-18.07	3.15	1.60938
N Norway	L. hyperborea	Mortens Site	2	317	Filbee-Dexter	69.6307	17.9442	293	264	14	12.05.2018	21.3	10.09.2018	121	-7.3	10.178	12.98	6.78	97.6617		52.1429	-0.430933	0.00327716	5.801	1.07174	-0.761148	-0.016417	0.525804	69.6	18.9497	1.63617	30.8777	-18.07	3.15	1.30337
N Norway	L. hyperborea	Mortens Site	2	317	Filbee-Dexter	69.6307	17.9442	293	264	14	12.05.2018	21.3	10.09.2018	121	-7.3	10.178	12.98	6.78	97.6617		52.1429	-0.430933	0.00327716	5.801	1.07174	-0.761148	-0.016417	0.525804	69.6	18.9497	1.63617	30.8777	-18.07	3.15	1.30337
N Norway	L. hyperborea	Lost chain	1	299	Filbee-Dexter	69.6126	17.917	271	248	10.95	12.05.2018	13.4	03.07.2018	52	-2.45	6.458	8.08	4.52	97.6617		22.3744	-0.430277	0.00358648	3.045	1.09157	-0.514346	-0.382376	0.712662	69.6	18.9497	1.63617	30.8777	-18.07	3.15	1.60938
N Norway	L. hyperborea	Lost chain	1	297	Filbee-Dexter	69.6126	17.917	299	257	15.25	12.05.2018	28.2	03.07.2018	52	-12.95	6.458	8.08	4.52	97.6617		84.918	-1.63304	0.0112707	3.045	1.09157	-0.514346	-0.382376	0.712662	69.6	18.9497	1.63617	30.8777	-18.07	3.15	1.60938
N Norway	L. hyperborea	Edoya	2	285	Filbee-Dexter	69.6094	17.908	270	281	15.15	12.05.2018	17.8	10.09.2018	121	-2.65	9.53603	12.3039	6.775	79.0635	12.7274	17.4917	-0.14456	0.00125568	5.52889	1.07174	-0.761148	-0.016417	0.525804	69.6	18.9497	1.63617	30.8777	-18.07	3.15	1.30337
N Norway	L. hyperborea	Mortens Site	2	318	Filbee-Dexter	69.6307	17.9442	293	256	13.84	12.05.2018	18.7	10.09.2018	121	-4.86	10.178	12.98	6.78	97.6617		35.1156	-0.290212	0.00234126	5.801	1.07174	-0.761148	-0.016417	0.525804	69.6	18.9497	1.63617	30.8777	-18.07	3.15	1.30337
N Norway	L. hyperborea	Mortens Site	2	318	Filbee-Dexter	69.6307	17.9442	293	256	13.84	12.05.2018	18.7	10.09.2018	121	-4.86	10.178	12.98	6.78	97.6617		35.1156	-0.290212	0.00234126	5.801	1.07174	-0.761148	-0.016417	0.525804	69.6	18.9497	1.63617	30.8777	-18.07	3.15	1.30337
N Norway	L. hyperborea	Mortens Site	2	322	Filbee-Dexter	69.6307	17.9442	295	266	11.75	12.05.2018	20.3	10.09.2018	121	-8.55	10.178	12.98	6.78	97.6617		72.766	-0.601372	0.00424112	5.801	1.07174	-0.761148	-0.016417	0.525804	69.6	18.9497	1.63617	30.8777	-18.07	3.15	1.30337
N Norway	L. hyperborea	Mortens Site	2	321	Filbee-Dexter	69.6307	17.9442	295	268	14.04	12.05.2018	21.3	10.09.2018	121	-7.26	10.178	12.98	6.78	97.6617		51.7094	-0.42735	0.00325515	5.801	1.07174	-0.761148	-0.016417	0.525804	69.6	18.9497	1.63617	30.8777	-18.07	3.15	1.30337
N Norway	L. hyperborea	Mortens Site	2	321	Filbee-Dexter	69.6307	17.9442	295	268	14.04	12.05.2018	21.3	10.09.2018	121	-7.26	10.178	12.98	6.78	97.6617		51.7094	-0.42735	0.00325515	5.801	1.07174	-0.761148	-0.016417	0.525804	69.6	18.9497	1.63617	30.8777	-18.07	3.15	1.30337
N Norway	L. hyperborea	Lost chain	1	298	Filbee-Dexter	69.6126	17.917	299	259	13.21	12.05.2018	17.5	03.07.2018	52	-4.29	6.458	8.08	4.52	97.6617		32.4754	-0.624527	0.00507355	3.045	1.09157	-0.514346	-0.382376	0.712662	69.6	18.9497	1.63617	30.8777	-18.07	3.15	1.60938
N Norway	S. latissima	Edoya	2	282	Filbee-Dexter	69.6094	17.908	297	285	14.93	12.05.2018	3.1	10.09.2018	121	11.83	9.53603	12.3039	6.775	79.0635	12.7274	-79.2364	0.654847	-0.0112167	5.52889	1.07174	-0.761148	-0.016417	0.525804	69.6	16.7198	1.95573	31.8081	-18.3033	3.14	1.30337
N Norway	S. latissima	Edoya	2	286	Filbee-Dexter	69.6094	17.908	297	287	16.43	12.05.2018	14.2	10.09.2018	121	2.23	9.53603	12.3039	6.775	79.0635	12.7274	-13.5727	0.112171	-0.00113138	5.52889	1.07174	-0.761148	-0.016417	0.525804	69.6	16.7198	1.95573	31.8081	-18.3033	3.14	1.30337
N Norway	S. latissima	Edoya	2	292	Filbee-Dexter	69.6094	17.908	297	288	16.8	12.05.2018	3.3	10.09.2018	121	13.5	9.53603	12.3039	6.775	79.0635	12.7274	-80.3571	0.664109	-0.0117404	5.52889	1.07174	-0.761148	-0.016417	0.525804	69.6	16.7198	1.95573	31.8081	-18.3033	3.14	1.30337
N Norway	S. latissima	Mortens Site	2	324	Filbee-Dexter	69.6307	17.9442	294	304	18.03	12.05.2018	13.8	10.09.2018	121	4.23	10.178	12.98	6.78	97.6617		-23.4609	0.193892	-0.0020776	5.801	1.07174	-0.761148	-0.016417	0.525804	69.6	16.7198	1.95573	31.8081	-18.3033	3.14	1.30337
N Norway	S. latissima	Edoya	2	290	Filbee-Dexter	69.6094	17.908	297	286	18.59	12.05.2018	14.5	10.09.2018	121	4.09	9.53603	12.3039	6.775	79.0635	12.7274	-22.0011	0.181827	-0.00193537	5.52889	1.07174	-0.761148	-0.016417	0.525804	69.6	16.7198	1.95573	31.8081	-18.3033	3.14	1.30337
N Norway	S. latissima	Lost chain	1	303	Filbee-Dexter	69.6126	17.917	300	241	16.57	12.05.2018	16.3	03.07.2018	52	0.67	6.458	8.08	4.52	97.6617		-1.62945	0.0313356	-0.000297815	3.045	1.09157	-0.514346	-0.382376	0.712662	69.6	16.7198	1.95573	31.8081	-18.3033	3.14	1.60938
N Norway	S. latissima	Edoya	2	296	Filbee-Dexter	69.6094	17.908	269	276	17.12	12.05.2018	12.3	10.09.2018	121	4.82	9.53603	12.3039	6.775	79.0635	12.7274	-28.1542	0.232679	-0.0025558	5.52889	1.07174	-0.761148	-0.016417	0.525804	69.6	16.7198	1.95573	31.8081	-18.3033	3.14	1.30337
N Norway	S. latissima	Edoya	2	287	Filbee-Dexter	69.6094	17.908	269	275	18.52	12.05.2018	12.7	10.09.2018	121	5.82	9.53603	12.3039	6.775	79.0635	12.7274	-31.4255	0.259715	-0.00292598	5.52889	1.07174	-0.761148	-0.016417	0.525804	69.6	16.7198	1.95573	31.8081	-18.3033	3.14	1.30337
N Norway	S. latissima	Lost chain	2	307	Filbee-Dexter	69.6126	17.917	300	243	13.61	12.05.2018	0.4	10.09.2018	121	13.21	10.178	12.98	6.78	97.6617		-97.061	0.802157	-0.0193821	5.801	1.07174	-0.761148	-0.016417	0.525804	69.6	16.7198	1.95573	31.8081	-18.3033	3.14	1.30337
N Norway	S. latissima	Edoya	2	289	Filbee-Dexter	69.6094	17.908	269	273	19.72	12.05.2018	10.5	10.09.2018	121	9.22	9.53603	12.3039	6.775	79.0635	12.7274	-46.7546	0.386401	-0.00486572	5.52889	1.07174	-0.761148	-0.016417	0.525804	69.6	16.7198	1.95573	31.8081	-18.3033	3.14	1.30337
N Norway	S. latissima	Mortens Site	1	315	Filbee-Dexter	69.6307	17.9442	294	302	19.13	12.05.2018	18.3	03.07.2018	52	1.23	6.458	8.08	4.52	97.6617		-4.33873	0.0834372	-0.000809734	3.045	1.09157	-0.514346	-0.382376	0.712662	69.6	16.7198	1.95573	31.8081	-18.3033	3.14	1.60938
N Norway	S. latissima	Mortens Site	1	316	Filbee-Dexter	69.6307	17.9442	294	303	25.95	12.05.2018	30.2	03.07.2018	52	3.15	6.458	8.08	4.52	97.6617		16.3776	-0.314955	0.00281605	3.045	1.09157	-0.514346	-0.382376	0.712662	69.6	16.7198	1.95573	31.8081	-18.3033	3.14	1.60938
N Norway	S. latissima	Mortens Site	1	316	Filbee-Dexter	69.6307	17.9442	294	303	25.95	12.05.2018	30.2	03.07.2018	52	3.15	6.458	8.08	4.52	97.6617		16.3776	-0.314955	0.00281605	3.045	1.09157	-0.514346	-0.382376	0.712662	69.6	16.7198	1.95573	31.8081	-18.3033	3.14	1.60938
N Norway	S. latissima	Lost chain	1	301	Filbee-Dexter	69.6126	17.917	298	250	15.07	12.05.2018	16.2	03.07.2018	52	-0.73	6.458	8.08	4.52	97.6617		7.49834	-0.144199	0.00130683	3.045	1.09157	-0.514346	-0.382376	0.712662	69.6	16.7198	1.95573	31.8081	-18.3033	3.14	1.60938
N Norway	S. latissima	Mortens Site	2	323	Filbee-Dexter	69.6307	17.9442	294	301	20.62	12.05.2018	15.4	10.09.2018	121	5.22	10.178	12.98	6.78	97.6617		-25.3152	0.209217	-0.00228378	5.801	1.07174	-0.761148	-0.016417	0.525804	69.6	16.7198	1.95573	31.8081	-18.3033	3.14	1.30337
N Norway	S. latissima	Lost chain	1	304	Filbee-Dexter	69.6126	17.917	300	242	18.81	12.05.2018	18.2	03.07.2018	52	1.01	6.458	8.08	4.52	97.6617		-3.24296	0.0623645	-0.000601473	3.045	1.09157	-0.514346	-0.382376	0.712662	69.6	16.7198	1.95573	31.8081	-18.3033	3.14	1.60938
N Norway	S. latissima	Mortens Site	1	311	Filbee-Dexter	69.6307	17.9442	292	253	17.72	12.05.2018	16.9	03.07.2018	52	1.22	6.458	8.08	4.52	97.6617		-4.62754	0.0889911	-0.00086138	3.045	1.09157	-0.514346	-0.382376	0.712662	69.6	16.7198	1.95573	31.8081	-18.3033	3.14	1.60938
N Norway	S. latissima	Edoya	2	294	Filbee-Dexter	69.6094	17.908	269	274	18.65	12.05.2018	6.9	10.09.2018	121	11.75	9.53603	12.3039	6.775	79.0635	12.7274	-63.0027	0.520683	-0.0075307	5.52889	1.07174	-0.761148	-0.016417	0.525804	69.6	16.7198	1.95573	31.8081	-18.3033	3.14	1.30337
N Norway	S. latissima	Mortens Site	2	319	Filbee-Dexter	69.6307	17.9442	292	262	23.29	12.05.2018	7.6	10.09.2018	121	15.69	10.178	12.98	6.78	97.6617		-67.368	0.55676	-0.00858101	5.801	1.07174	-0.761148	-0.016417	0.525804	69.6	16.7198	1.95573	31.8081	-18.3033	3.14	1.30337
N Norway	S. latissima	Lost chain	2	308	Filbee-Dexter	69.6126	17.917	300	244	20.48	12.05.2018	18.9	10.09.2018	121	1.58	10.178	12.98	6.78	97.6617		-7.71484	0.063759	-0.000631426	5.801	1.07174	-0.761148	-0.016417	0.525804	69.6	16.7198	1.95573	31.8081	-18.3033	3.14	1.30337
N Norway	S. latissima	Mortens Site	2	324	Filbee-Dexter	69.6307	17.9442	294	304	18.03	12.05.2018	13.8	10.09.2018	121	4.23	10.178	12.98	6.78	97.6617		-23.4609	0.193892	-0.0020776	5.801	1.07174	-0.761148	-0.016417	0.525804	69.6	16.7198	1.95573	31.8081	-18.3033	3.14	1.30337
N Norway	S. latissima	Mortens Site	2	320	Filbee-Dexter	69.6307	17.9442	292	254	26.22	12.05.2018	10.1	10.09.2018	121	16.12	10.178	12.98	6.78	97.6617		-61.4798	0.508097	-0.00741328	5.801	1.07174	-0.761148	-0.016417	0.525804	69.6	16.7198	1.95573	31.8081	-18.3033	3.14	1.30337
N Norway	S. latissima	Mortens Site	1	312	Filbee-Dexter	69.6307	17.9442	292	255	19.18	12.05.2018	18.2	03.07.2018	52	1.38	6.458	8.08	4.52	97.6617		-5.10949	0.0982594	-0.000957341	3.045	1.09157	-0.514346	-0.382376	0.712662	69.6	16.7198	1.95573	31.8081	-18.3033	3.14	1.60938
N Norway	S. latissima	Mortens Site	1	312	Filbee-Dexter	69.6307	17.9442	292	255	19.18	12.05.2018	18.2	03.07.2018	52	1.38	6.458	8.08	4.52	97.6617		-5.10949	0.0982594	-0.000957341	3.045	1.09157	-0.514346	-0.382376	0.712662	69.6	16.7198	1.95573	31.8081	-18.3033	3.14	1.60938
N Norway	S. latissima	Mortens Site	1	311	Filbee-Dexter	69.6307	17.9442	292	253	17.72	12.05.2018	16.9	03.07.2018	52	1.22	6.458	8.08	4.52	97.6617		-4.62754	0.0889911	-0.00086138	3.045	1.09157	-0.514346	-0.382376	0.712662	69.6	16.7198	1.95573	31.8081	-18.3033	3.14	1.60938
N Norway	S. latissima	Mortens Site	2	320	Filbee-Dexter	69.6307	17.9442	292	254	26.22	12.05.2018	10.1	10.09.2018	121	16.12	10.178	12.98	6.78	97.6617		-61.4798	0.508097	-0.00741328	5.801	1.07174	-0.761148	-0.016417	0.525804	69.6	16.7198	1.95573	31.8081	-18.3033	3.14	1.30337
N Norway	S. latissima	Mortens Site	2	323	Filbee-Dexter	69.6307	17.9442	294	301	20.62	12.05.2018	15.4	10.09.2018	121	5.22	10.178	12.98	6.78	97.6617		-25.3152	0.209217	-0.00228378	5.801	1.07174	-0.761148	-0.016417	0.525804	69.6	16.7198	1.95573	31.8081	-18.3033	3.14	1.30337
N Norway	S. latissima	Mortens Site	2	319	Filbee-Dexter	69.6307	17.9442	292	262	23.29	12.05.2018	7.6	10.09.2018	121	15.69	10.178	12.98	6.78	97.6617		-67.368	0.55676	-0.00858101	5.801	1.07174	-0.761148	-0.016417	0.525804	69.6	16.7198	1.95573	31.8081	-18.3033	3.14	1.30337
N Norway	S. latissima	Mortens Site	1	315	Filbee-Dexter	69.6307	17.9442	294	302	19.13	12.05.2018	18.3	03.07.2018	52	1.23	6.458	8.08	4.52	97.6617		-4.33873	0.0834372	-0.000809734	3.045	1.09157	-0.514346	-0.382376	0.712662	69.6	16.7198	1.95573	31.8081	-18.3033	3.14	1.60938
N Norway	S. latissima	Lost chain	1	302	Filbee-Dexter	69.6126	17.917	298	251	18.3	12.05.2018	17.9	03.07.2018	52	0.8	6.458	8.08	4.52	97.6617		-2.18579	0.0420345	-0.000402753	3.045	1.09157	-0.514346	-0.382376	0.712662	69.6	16.7198	1.95573	31.8081	-18.3033	3.14	1.60938

## Sheet: Data C
Region	Site	Species	retrieval	WWperday	CtoN ratio	Carbon percent	Nitrogen percent	k	kRrefractory	Latitude	MeanLight	Exposure	MeanTemperature	Temperature range
Alaska	Herring	S. latissima	1	0	15.4196	29.4802	1.97391	0	-0.007388	59.5	80.1847	1.62153	8.27276	6.224
Alaska	Herring	S. latissima	2	0.256576	15.4196	29.4802	1.97391	-0.00377519	-0.0078766	59.5	142.494	1.64373	10.2269	3.726
Alaska	Hesketh	S. latissima	1	0	15.4196	29.4802	1.97391	0	-0.0065466	59.5	116.577	1.66694	8.20918	4.57
Alaska	Hesketh	S. latissima	2	0.388927	15.4196	29.4802	1.97391	-0.0108537	-0.0149575	59.5	35.271	1.63737	10.1836	3.527
Alaska	Jakolof	S. latissima	1	0.0859869	15.4196	29.4802	1.97391	-0.00113617	-0.0113314	59.5	13.7432	1.28373	8.8377	6.195
Alaska	Jakolof	S. latissima	2	0.96917	15.4196	29.4802	1.97391	-0.027379	-0.0314837	59.5	10.2513	1.46517	10.6747	3.618
British Columbia	Fulford	S. latissima	1	0.0582249	14.1757	36.2608	2.56427	-0.000567535	-0.0145491	48.7	123.244	0.840723	12.9662	3.466
British Columbia	Fulford	S. latissima	2	0.166977	14.1757	36.2608	2.56427	-0.00168139	-0.00832836	48.7	67.0205	0.667472	12.8873	3.468
British Columbia	Portland	S. latissima	1	0.382787	14.1757	36.2608	2.56427	-0.00398791	-0.0179695	48.7	53.0217	1.19585	13.1493	3.848
British Columbia	Portland	S. latissima	2	0.548957	14.1757	36.2608	2.56427	-0.0146192	-0.0212661	48.7	30.6914	1.51189	12.9965	3.179
British Columbia	Russell	S. latissima	1	0.26556	14.1757	36.2608	2.56427	-0.00268539	-0.0166669	48.7	50.2018	1.27369	12.8988	3.179
British Columbia	Russell	S. latissima	2	0.761861	14.1757	36.2608	2.56427	-0.0159756	-0.0226226	48.7	71.9539	1.47421	12.8586	3.276
England	Batton Bay	L. hyperborea	1	0.11242	17.6532	29.4897	1.67572	-0.00109235	-0.0155732	50.3	287.841	1.41588	17.1323	2.475
England	Batton Bay	S. latissima	1	0.0718029	18.4036	35.0043	1.90848	-0.000699656	-0.0151806	50.3	287.841	1.41588	17.1323	2.475
England	Breakwater	L. hyperborea	1	0.146029	17.6532	29.4897	1.67572	-0.00144448	-0.0159254	50.3	232.26	1.41588	17.0303	2.666
England	Breakwater	L. hyperborea	2	0.151508	17.6532	29.4897	1.67572	-0.00178066	-0.00821662	50.3	89.2851	1.0815	16.508	2.191
England	Breakwater	S. latissima	1	0.107222	18.4036	35.0043	1.90848	-0.00104699	-0.0155279	50.3	232.26	1.41588	17.0303	2.666
England	Breakwater	S. latissima	2	0.245322	18.4036	35.0043	1.90848	-0.00298524	-0.00942119	50.3	89.2851	1.0815	16.508	2.191
England	Ramscliff Pt	L. hyperborea	1	0.323995	17.6532	29.4897	1.67572	-0.00324908	-0.01773	50.3	240.235	1.70305	17.2687	2.76
England	Ramscliff Pt	L. hyperborea	2	0	17.6532	29.4897	1.67572	0	-0.00480224	50.3	196.508	1.65489	16.6966	2.571
England	Ramscliff Pt	S. latissima	1	0.184875	18.4036	35.0043	1.90848	-0.00182934	-0.0163102	50.3	240.235	1.70305	17.2687	2.76
England	Ramscliff Pt	S. latissima	2	0.067775	18.4036	35.0043	1.90848	-0.000683362	-0.00711932	50.3	196.508	1.65489	16.6966	2.571
France	Roscoff1	L. hyperborea	1	0.253185	28.0343	37.5452	1.39576	-0.00307598	-0.0134725	48.7	18.1485	1.20183	16.4736	1.524
France	Roscoff1	L. hyperborea	2	0.0623138	28.0343	37.5452	1.39576	-0.000727276	-0.00499533	48.7	18.1485	1.40611	16.2766	1.906
France	Roscoff1	S. latissima	1	0.883737	37.3459	35.9368	1.00027	-0.0105628	-0.0209593	48.7	18.1485	1.20183	16.4736	1.524
France	Roscoff1	S. latissima	2	0.49457	37.3459	35.9368	1.00027	-0.00682407	-0.0110921	48.7	18.1485	1.40611	16.2766	1.906
France	Roscoff2	L. hyperborea	1	0.0750277	28.0343	37.5452	1.39576	-0.000740905	-0.0111374	48.7	26.9545	1.59851	16.569	2.191
France	Roscoff2	L. hyperborea	2	0.114697	28.0343	37.5452	1.39576	-0.00123202	-0.00550007	48.7	26.9545	1.46577	16.2461	2.669
France	Roscoff2	S. latissima	1	0.508273	37.3459	35.9368	1.00027	-0.00571344	-0.01611	48.7	26.9545	1.59851	16.569	2.191
France	Roscoff2	S. latissima	2	0.426211	37.3459	35.9368	1.00027	-0.00530005	-0.0095681	48.7	26.9545	1.46577	16.2461	2.669
France	Roscoff3	L. hyperborea	1	0.358695	28.0343	37.5452	1.39576	-0.00420252	-0.0145991	48.7	24.383	1.49668	16.2312	1.62
France	Roscoff3	L. hyperborea	2	0.0723804	28.0343	37.5452	1.39576	-0.000713265	-0.00498132	48.7	24.383	1.61529	16.0276	2.098
France	Roscoff3	S. latissima	1	0.412568	37.3459	35.9368	1.00027	-0.0044214	-0.0148179	48.7	24.383	1.49668	16.2312	1.62
France	Roscoff3	S. latissima	2	0.470641	37.3459	35.9368	1.00027	-0.00588168	-0.0101497	48.7	24.383	1.61529	16.0276	2.098
N Norway	Edoya	L. hyperborea	2	0	18.9497	30.8777	1.63617	0	-0.00220519	69.6	79.0635	1.30337	9.53603	5.52889
N Norway	Edoya	S. latissima	2	0.376554	16.7198	31.8081	1.95573	-0.00548775	-0.0088387	69.6	79.0635	1.30337	9.53603	5.52889
N Norway	Lost chain	L. hyperborea	1	0	18.9497	30.8777	1.63617	0	-0.00173874	69.6	97.6617	1.60938	6.458	3.045
N Norway	Lost chain	L. hyperborea	2	0	18.9497	30.8777	1.63617	0	0	69.6	97.6617	1.30337	10.178	5.801
N Norway	Lost chain	S. latissima	1	0	16.7198	31.8081	1.95573	0	-0.00779621	69.6	97.6617	1.60938	6.458	3.045
N Norway	Lost chain	S. latissima	2	0.432958	16.7198	31.8081	1.95573	-0.0100068	-0.0133577	69.6	97.6617	1.30337	10.178	5.801
N Norway	Mortens Site	L. hyperborea	1	0	18.9497	30.8777	1.63617	0	-0.00374261	69.6	97.6617	1.60938	6.458	3.045
N Norway	Mortens Site	L. hyperborea	2	0	18.9497	30.8777	1.63617	0	-7.22777e-05	69.6	97.6617	1.30337	10.178	5.801
N Norway	Mortens Site	S. latissima	1	0	16.7198	31.8081	1.95573	0	-0.00775051	69.6	97.6617	1.60938	6.458	3.045
N Norway	Mortens Site	S. latissima	2	0.366991	16.7198	31.8081	1.95573	-0.00508892	-0.00843987	69.6	97.6617	1.30337	10.178	5.801
New England	Bakers Island 1	S. latissima	1	1.35455	30.2107	38.4484	1.2789	-0.0358882	-0.0432603	42.5			21.04	7
New England	Bakers Island 2	S. latissima	1	1.58627	30.2107	38.4484	1.2789	-0.0437308	-0.0511029	42.5			21.04	7
New England	Bakers Island 3	S. latissima	1	0.99008	30.2107	38.4484	1.2789	-0.028742	-0.0366516	42.5			21.04	7
Nova Scotia	Paddys Head	S. latissima	1	0.165494	88.6779	34.8712	0.412213	-0.00168577	-0.00963607	44.5		1.41052
Nova Scotia	Sandy Cove	S. latissima	1	0.0831496	88.6779	34.8712	0.412213	-0.000816472	-0.00909127	44.5	899.464	1.46131	12.9334	11.394
Nova Scotia	Sandy Cove	S. latissima	2	0.295511	88.6779	34.8712	0.412213	-0.00363723	-0.00835194	44.5	681.797	1.4813	18.2192	10.627
Nova Scotia	The Lodge	S. latissima	1	0.166162	88.6779	34.8712	0.412213	-0.00166635	-0.00961664	44.5	261.715	1.67785	10.7753	18.619
Nova Scotia	The Lodge	S. latissima	2	0.359432	88.6779	34.8712	0.412213	-0.00478726	-0.00934305	44.5		1.64255	17.0438	10.952
Portugal	1	L. hyperborea	1	3.125	14.8155	31.007	2.10985	-0.0951308	-0.107802	41.2	698.024	1.1603	14.9775	7.447
Portugal	1	L. hyperborea	2	3.0303	14.8155	31.007	2.10985	-0.034079	-0.0385347	41.2	260.804	1.1603	13.9696	5.063
Portugal	1	S. latissima	1	1.44801	20.6903	31.3359	1.57939	-0.0300067	-0.0426774	41.2	698.024	1.1603	14.9775	7.447
Portugal	1	S. latissima	2	1.66667	20.6903	31.3359	1.57939	-0.0336994	-0.0381551	41.2	260.804	1.1603	13.9696	5.063
Portugal	2	L. hyperborea	1	3.125	14.8155	31.007	2.10985	-0.096682	-0.109353	41.2	144.673	1.34369	15.0274	6.589
Portugal	2	L. hyperborea	2	3.0303	14.8155	31.007	2.10985	-0.0334038	-0.0378594	41.2	164.472	1.413	14.0262	3.158
Portugal	2	S. latissima	1	2.35106	20.6903	31.3359	1.57939	-0.0603263	-0.0729971	41.2	144.673	1.34369	15.0274	6.589
Portugal	2	S. latissima	2	1.66667	20.6903	31.3359	1.57939	-0.0349066	-0.0393623	41.2	164.472	1.413	14.0262	3.158
Portugal	3	L. hyperborea	1	3.125	14.8155	31.007	2.10985	-0.09644	-0.109111	41.2	525.479	0.823591	14.9835	6.494
Portugal	3	L. hyperborea	2	3.0303	14.8155	31.007	2.10985	-0.033345	-0.0378007	41.2	49.3039	0.72875	13.9728	3.158
Portugal	3	S. latissima	1	2.98961	20.6903	31.3359	1.57939	-0.0792595	-0.0919303	41.2	525.479	0.823591	14.9835	6.494
Portugal	3	S. latissima	2	3.0303	20.6903	31.3359	1.57939	-0.0332393	-0.037695	41.2	49.3039	0.72875	13.9728	3.158
Rhode I	ft_wetherill	S. latissima	1	2.04019	20.2384	38.3474	1.95725	-0.0658661	-0.0741409	41.5	2.2119	1.54352	19.1648	7.722
Rhode I	ft_wetherill	S. latissima	2	2	20.2384	38.3474	1.95725	-0.0362443	-0.0410713	41.5	2.2119	1.55962	18.8687	0.577
Rhode I	kings_beach	S. latissima	1	1.80179	20.2384	38.3474	1.95725	-0.0430369	-0.0513117	41.5	2.2119	1.54352	19.1648	7.722
Rhode I	kings_beach	S. latissima	2	1.19048	20.2384	38.3474	1.95725	-0.0362443	-0.0410713	41.5	2.2119	1.55962	18.8687	8.299
S Norway	S13	L. hyperborea	1	0.574089	26.3421	36.7485	1.41755	-0.00733552	-0.014576	58.4	599.512	1.80466	16.6156	3.146
S Norway	S13	L. hyperborea	2	0.619202	26.3421	36.7485	1.41755	-0.0112443	-0.0167987	58.4	304.115	1.77608	13.2019	5.018
S Norway	S13	S. latissima	1	0.797992	36.5098	37.0782	1.05704	-0.0108711	-0.0181116	58.4	599.512	1.80466	16.6156	3.146
S Norway	S13	S. latissima	2	0.604299	36.5098	37.0782	1.05704	-0.00812862	-0.0136829	58.4	304.115	1.77608	13.2019	5.018
S Norway	S3	L. hyperborea	1	0.393897	26.3421	36.7485	1.41755	-0.00426577	-0.0117744	58.4	720.832	1.20731	15.7151	4.681
S Norway	S3	L. hyperborea	2	0.401637	26.3421	36.7485	1.41755	-0.00499324	-0.0105476	58.4	240.364	1.34922	11.9197	2.908
S Norway	S3	S. latissima	1	1.02679	36.5098	37.0782	1.05704	-0.0146146	-0.0221232	58.4	720.832	1.20731	15.7151	4.681
S Norway	S3	S. latissima	2	0.72546	36.5098	37.0782	1.05704	-0.0121664	-0.0177207	58.4	240.364	1.34922	11.9197	2.908
S Norway	S5	L. hyperborea	1	0.47619	26.3421	36.7485	1.41755	-0.00696257	-0.0143347	58.4	311.161	1.80466	15.6469	4.299
S Norway	S5	L. hyperborea	2	0.503584	26.3421	36.7485	1.41755	-0.00665692	-0.0122112	58.4	94.1214	1.77608	11.8057	3.393
S Norway	S5	S. latissima	1	0.408433	36.5098	37.0782	1.05704	-0.00449747	-0.0118696	58.4	311.161	1.80466	15.6469	4.299
S Norway	S5	S. latissima	2	0.299357	36.5098	37.0782	1.05704	-0.00360511	-0.00915943	58.4	94.1214	1.77608	11.8057	3.393
St Lawrence	Site 1	S. latissima	1	1.50504	24.7752	36.0801	1.49516	-0.0332666	-0.0448513	47.7	38.5066		6.26135	15.755
St Lawrence	Site 2	S. latissima	2	0.563725	24.7752	36.0801	1.49516	-0.0159078	-0.019883	47.7	37.7566		7.13714	12.61
St Lawrence	Site 3	S. latissima	1	1.4651	24.7752	36.0801	1.49516	-0.0193989	-0.0309836	47.7	37.7566		6.26135	15.71
St Lawrence	Site 3	S. latissima	2	0.980392	24.7752	36.0801	1.49516	-0.0293699	-0.0333451	47.7	37.7566		7.13714	12.61
W Scotland	Danger Reef	L. hyperborea	1	0.417336	28.9535	36.289	1.35792	-0.00437378	-0.0138032	56.5	105.719	1.51658	13.0739	1.929
W Scotland	Danger Reef	L. hyperborea	2	0.34097	28.9535	36.289	1.35792	-0.00372559	-0.00935705	56.5	11.8244	1.53411	13.7867	0.769
W Scotland	Danger Reef	S. latissima	1	0.570436	32.0433	35.1735	1.28349	-0.00658551	-0.0160149	56.5	105.719	1.51658	13.0739	1.929
W Scotland	Danger Reef	S. latissima	2	0.548389	32.0433	35.1735	1.28349	-0.00728652	-0.012918	56.5	11.8244	1.53411	13.7867	0.769
W Scotland	Goat Island	L. hyperborea	1	0.674877	28.9535	36.289	1.35792	-0.00753607	-0.0169655	56.5	165.146	1.61287	13.1331	1.833
W Scotland	Goat Island	L. hyperborea	2	0.378914	28.9535	36.289	1.35792	-0.0044271	-0.0100586	56.5	9.3878	1.48516	13.5421	1.059
W Scotland	Goat Island	S. latissima	1	0.361083	32.0433	35.1735	1.28349	-0.00378456	-0.013214	56.5	165.146	1.61287	13.1331	1.833
W Scotland	Goat Island	S. latissima	2	0.397768	32.0433	35.1735	1.28349	-0.00453373	-0.0101652	56.5	9.3878	1.48516	13.5421	1.059
W Scotland	The Greggs	L. hyperborea	1	0.567169	28.9535	36.289	1.35792	-0.00621113	-0.0156406	56.5	179.304	1.44836	13.2139	1.927
W Scotland	The Greggs	L. hyperborea	2	0.361075	28.9535	36.289	1.35792	-0.00399526	-0.00962672	56.5	26.5271	1.44985	13.8352	0.962
W Scotland	The Greggs	S. latissima	1	0.681971	32.0433	35.1735	1.28349	-0.00772535	-0.0171548	56.5	179.304	1.44836	13.2139	1.927
W Scotland	The Greggs	S. latissima	2	0.518059	32.0433	35.1735	1.28349	-0.00675197	-0.0123834	56.5	26.5271	1.44985	13.8352	0.962

## Sheet: Data D
Cotton Strip ID (cage)	Region	Site	retrieval	Daysrun	Latitude	Temperature	Plossperday
Bag 181	Portugal	1	2	59	41.1774	13.9696	0.726392
Bag 182	Portugal	1	2	59	41.1774	13.9696	0.756659
Bag 183	Portugal	1	2	59	41.1774	13.9696	0.739003
Bag 184	Portugal	1	2	59	41.1774	13.9696	0.70117
Bag 185	Portugal	2	2	59	41.1763	14.0262	0.62046
Bag 186	Portugal	2	2	59	41.1763	14.0262	0.74657
Bag 187	Portugal	2	2	59	41.1763	14.0262	0.648204
Bag 188	Portugal	2	2	59	41.1763	14.0262	0.749092
Bag 189	Portugal	3	2	59	41.1771	13.9728	0.678471
Bag 190	Portugal	3	2	59	41.1771	13.9728	0.731437
Bag 191	Portugal	3	2	59	41.1771	13.9728	0.698648
Bag 192	Portugal	3	2	59	41.1771	13.9728	0.686037
407	British Columbia	Fulford	2	32	48.748	12.9662	2.20889
413	British Columbia	Russell	2	32	47.75	12.8988	2.14379
420	British Columbia	Fulford	2	32	48.7505	12.8988	2.11589
377	British Columbia	Fulford	2	32	48.748	12.9662	1.99498
380	British Columbia	Russell	2	32	48.7505	12.8586	2.05078
387	British Columbia	Fulford	2	32	48.748	12.9662	1.71596
388	British Columbia	Fulford	2	32	48.748	12.9662	2.19959
389	British Columbia	Russell	2	32	48.7505	12.8988	2.04148
554	Scotland	1	2	29	56.472	13.7867	0.856938
557	Scotland	1	2	29	56.472	13.7867	0.831281
562	Scotland	1	2	29	56.472	13.7867	0.64142
567	Scotland	2	2	29	56.4784	13.8352	1.10324
573	Scotland	2	2	29	56.4784	13.8352	1.20074
580	Scotland	3	2	29	56.5252	13.5421	1.2931
583	Scotland	3	2	29	56.5252	13.5421	1.24692
589	Scotland	3	2	29	56.5252	13.5421	1.02114
C1	France	Site 1	2	64	48.7089	16.2766	1.1277
C2	France	Site 1	2	64	48.7089	16.2766	1.29511
C3	France	Site 1	2	64	48.7089	16.2766	1.29976
C4	France	Site 1	2	64	48.7089	16.2766	0.992839
C1	France	Site 2	2	64	48.7092	16.2461	1.36719
C2	France	Site 2	2	64	48.7092	16.2461	1.4881
C3	France	Site 2	2	64	48.7092	16.2461	1.38346
C4	France	Site 2	2	64	48.7092	16.2461	1.36486
C1	France	Site 3	2	64	48.7325	16.0276	0.937035
C2	France	Site 3	2	64	48.7325	16.0276	0.85333
C3	France	Site 3	2	64	48.7325	16.0276	0.806827
C4	France	Site 3	2	64	48.7325	16.0276	1.03237
RI FW-794	Rhode I Sound	ft_wetherill	2	49	41.4773	19.1648	1.49417
RI FW-cotton- 826	Rhode I Sound	ft_wetherill	2	49	41.4773	19.1648	1.47595
RI FW-793	Rhode I Sound	ft_wetherill	2	49	41.4773	19.1648	1.41217
RI FW-824	Rhode I Sound	ft_wetherill	2	49	41.4773	19.1648	1.21781
242 C	Norwegian Sea	Lost chain	2	69	69.6126	10.178	0.368789
267 C	Norwegian Sea	Mortens Site	2	69	69.6307	10.178	0.366632
255 C	Norwegian Sea	Mortens Site	2	69	69.6307	10.178	0.537008
312	Skagerrak	S3	2	20	58.396	11.9197	2.18006
313	Skagerrak	S3	2	20	58.396	11.9197	1.03423
316	Skagerrak	S3	2	20	58.396	11.9197	1.22024
319	Skagerrak	S3	2	20	58.396	11.9197	2.62649
ArS13-315	Skagerrak	S13	2	20	58.417	13.2019	0.104167
ArS13-320	Skagerrak	S13	2	20	58.417	13.2019	-0.133929
ARS13-cotton unlabeled	Skagerrak	S13	2	20	58.417	13.2019	-0.0967262

## Sheet: Data E
Region	Site	wet weight per day g	latitude	seafloor temperature	coastal residence time d	% export current	% export RCP4.5	% export RCP8.5
Gulf of St. Lawrence	Site 1	-1.50504	47.7	8.99135	28.9637	0.693159	0.686284	0.652354
Gulf of St. Lawrence	Site 2	-0.563725	47.7	9.86714	28.9637	0.709999	0.703123	0.669193
Gulf of St. Lawrence	Site 3	-1.27122	47.7	9.42925	28.9637	0.68972	0.682845	0.648915
Norwegian Sea	Edoya	-0.222106	69.6	12.266	185.115	0.614987	0.571042	0.354187
Norwegian Sea	Lost chain	-0.0834709	69.6	11.048	185.115	0.763786	0.719842	0.502986
Norwegian Sea	Mortens Site	-0.118999	69.6	11.048	185.115	0.777613	0.733669	0.516813
Gulf of Alaska	Herring	-0.145108	59.5	11.9798	237.241	0.418931	0.362613	0.101309
Gulf of Alaska	Hesketh	-0.228126	59.5	11.9264	237.241	0.347541	0.291223	0.077391
Gulf of Alaska	Jakolof	-0.574803	59.5	12.4862	237.241	0.0673209	0.0391617	0
British Columbia	Fulford	-0.120102	48.7	15.6568	193.088	0.402216	0.356379	0.130185
British Columbia	Portland	-0.489332	48.7	15.8029	189.042	0.140328	0.095452	0
British Columbia	Russell	-0.513711	48.7	15.6087	193.088	0.106298	0.0604608	0
Scotland	Danger Reef	-0.469283	56.5	16.1603	837.684	0	0	0
Scotland	Goat Island	-0.453161	56.5	16.0676	837.684	0	0	0
Scotland	The Greggs	-0.532068	56.5	16.2546	837.684	0	0	0
Nova Scotia	Sandy Cove	-0.18933	44.5	18.3063	456.194	0.204215	0.150067	0
Nova Scotia	The Lodge	-0.262797	44.5	13.5053	496.402	0.210282	0.0924421	0
Portugal	1	-2.3175	41.2	17.2036	57.5923	0	0	0
Portugal	2	-2.54326	41.2	17.2568	57.5923	0	0	0
Portugal	3	-3.0438	41.2	17.2082	57.5923	0	0	0
Skagerrak	S13	-0.648896	58.4	17.6388	1828.97	0	0	0
Skagerrak	S3	-0.636947	58.4	16.5474	1803.59	0	0	0
Skagerrak	S5	-0.421891	58.4	16.4563	1728.68	0	0	0
France	Roscoff1	-0.385319	48.7	19.1051	1087.5	0	0	0
France	Roscoff2	-0.282503	48.7	19.1375	1087.5	0	0	0
France	Roscoff3	-0.330141	48.7	18.8594	1087.5	0	0	0
England	Batton Bay	-0.0921114	50.3	19.8623	855.276	0	0	0
England	Breakwater	-0.167394	50.3	19.4992	855.276	0	0	0
England	Ramscliff Pt	-0.165605	50.3	19.7127	855.276	0	0	0
Gulf of Maine	Bakers Island 1	-1.35455	42.5	23.77	476.446	0	0	0
Gulf of Maine	Bakers Island 2	-1.58627	42.5	23.77	476.446	0	0	0
Gulf of Maine	Bakers Island 3	-1.03969	42.5	23.77	476.446	0	0	0
Rhode I Sound	ft_wetherill	-2.0287	41.5	21.7467	498.477	0	0	0
Rhode I Sound	kings_beach	-1.62713	41.5	21.7467	498.477	0	0	0

## Sheet: Data F
Region	Site	ECOREGION	CRT	CRT Ecoregion	CRT sd
Gulf of St. Lawrence	Site 1	Gulf of St. Lawrence - Eastern Scotian Shelf	28.9637	227.52	181.93
Gulf of St. Lawrence	Site 2	Gulf of St. Lawrence - Eastern Scotian Shelf	28.9637	227.52	181.93
Gulf of St. Lawrence	Site 3	Gulf of St. Lawrence - Eastern Scotian Shelf	28.9637	227.52	181.93
Norwegian Sea	Edoya	Northern Norway and Finnmark	185.115	56.4	84.6
Norwegian Sea	Lost chain	Northern Norway and Finnmark	185.115	56.4	84.6
Norwegian Sea	Mortens Site	Northern Norway and Finnmark	185.115	56.4	84.6
Gulf of Alaska	Herring	Gulf of Alaska	237.241	107.41	83.28
Gulf of Alaska	Hesketh	Gulf of Alaska	237.241	107.41	83.28
Gulf of Alaska	Jakolof	Gulf of Alaska	237.241	107.41	83.28
British Columbia	Fulford	Puget Trough/Georgia Basin	193.088	182.23	114.89
British Columbia	Portland	Puget Trough/Georgia Basin	189.042	182.23	114.89
British Columbia	Russell	Puget Trough/Georgia Basin	193.088	182.23	114.89
Scotland	Danger Reef	Celtic Seas	837.684	396.54	355.82
Scotland	Goat Island	Celtic Seas	837.684	396.54	355.82
Scotland	The Greggs	Celtic Seas	837.684	396.54	355.82
Nova Scotia	Paddys Head	Scotian Shelf	490.433	157.08	180.23
Nova Scotia	Sandy Cove	Scotian Shelf	456.194	157.08	180.23
Nova Scotia	The Lodge	Scotian Shelf	496.402	157.08	180.23
Portugal	1	South European Atlantic Shelf	57.5923	168.52	224.61
Portugal	2	South European Atlantic Shelf	57.5923	168.52	224.61
Portugal	3	South European Atlantic Shelf	57.5923	168.52	224.61
Skagerrak	S13	North Sea	1828.97	1021.63	1228.12
Skagerrak	S3	North Sea	1803.59	1021.63	1228.12
Skagerrak	S5	North Sea	1728.68	1021.63	1228.12
France	Roscoff1	Celtic Seas	1087.5	396.54	355.82
France	Roscoff2	Celtic Seas	1087.5	396.54	355.82
France	Roscoff3	Celtic Seas	1087.5	396.54	355.82
England	Batton Bay	Celtic Seas	855.276	396.54	355.82
England	Breakwater	Celtic Seas	855.276	396.54	355.82
England	Ramscliff Pt	Celtic Seas	855.276	396.54	355.82
Gulf of Maine	Bakers Island 1	Gulf of Maine/Bay of Fundy	476.446	296.81	175.47
Gulf of Maine	Bakers Island 2	Gulf of Maine/Bay of Fundy	476.446	296.81	175.47
Gulf of Maine	Bakers Island 3	Gulf of Maine/Bay of Fundy	476.446	296.81	175.47
Rhode I Sound	ft_wetherill	Virginian	498.477	197.1	208.24
Rhode I Sound	kings_beach	Virginian	498.477	197.1	208.24

## Sheet: Metadata
Data files
Entered 18.May.2022 by Karen Filbee-Dexter
Each sheet is refered to in the main manuscript or supplement.
Data A
Logger files at each site for the duration of the experiment. HOBO Pendant loggers.
Temperatures were averaged over the period of deployment for the analyses
Data descriptors
Temperature	seafloor temperature
Light	PAR
retrieval	the first or second retrieval of the litterbags
Data B
Raw data of litterbag biomass, Nitrogen, Carbon and stables isotopes.
Data descriptors
Species	kelp species
Site	the site within the region that the experiment was deployed
retrieval	the first or second retrieval of the litterbags
Partner.name	the researcher who conducted the experiment
Lat	latitute
Lon	longitude
Cage.Label	the label of the cage the bags were put in
Bag.label	the label for each bag
WW..g..pre	inital weight of kelp (g)
WW.retrieval	weight on retrieval (g)
Days	total days of deployment for the bag
WW.change	change in kelp wet weight g
MeanTemperature	average temperature at seafloor over period of deployment
MaxTemperature	maximum temperature at seafloor over period of deployment
minTemperature	minimum temperature at seafloor over period of deployment
MeanLight	average PAR from light logger
SDLight	sd light logger
PWeight	percent of biomass loss, formula = (retrieval weight - initial weight)/inital weight*100; biomass loss is negative
WWperday	rate of loss of wet weight in g per day
k	k value for decomposition
Temp.range	range of sea temperature on the seafloor, formula = maximum temperature - minimum temperature
g3	measure of wave energy on the seafloor, inside the bag, formula = mean(X)*mean(Y)*mean(Z)
X	HOBO g logger, x axis acceleration
Y	HOBO g logger, y axis acceleration
Z	HOBO g logger, z axis acceleration
CtoN	Carbon to nitrogen ratio from dry kelp samples
Nitrogen percent	Nitrogen content (%)
Carbon percent	Carbon content (%)
C13	Frequency measures of ‰ δ13C
N15	Frequency measures of ‰ δ15N
Data C
Data descriptors
Average site level data for decomposition rates and predictor variables for use in models
Average values were obtained for litterbags of each species, at each retrieval time and each site
Data D
Data descriptors
Cotton Strip ID (cage)	litterbag cage that the strip was deployed in
Temperature	average temperature at seafloor
Plossperday	percent loss of tensile strength per day
Data E
Export potential of kelp material to the deep ocean.
Export potential represents the percent of detrital material that could cross the shelf break (200 m isobath) and sink to the deep sea
Average coastal residence times (days) are simulated for each site location
Predicted changed in export based on predicted sea surface temperature increase under short-term (2020-2050) RCP4.5 and long-term (2070-2100) RCP8.5
Data descriptors
wet weight per day g	average decomposition rate, across retrievals, sites, and the two kelp species
coastal residence time d	average coastal residence times (CRT; days), mean tracked parcels of coastal water bodies in 3 dimensions from at 0.125º resolution, and then calculated an average CRT for each starting point from 1998 to 2007
% export current	percent export across 200 m depth. Formula = 100-(CRT*WWperday/initial weight*100)
% export RCP4.5	with predicted decomposition rate Wwperday from decomposition temperature model +0.46 degrees C, which is predicted for northern hemisphere for 2050
% export RCP8.5	with predicted decomposition rate WWperday from model +2.73 degrees C, predicted for northern hemisphere for 2100
Data F
Coastal residence time for site location compared to broader ecoregion the study site is located in
Region	Study region
Site	Study site
ECOREGION	Ecoregion of study site
CRT	Coastal residence time for study site location
CRT Ecoregion	Average coastal residence time for entire ecoregion
CRT sd	Standard deviation of coastal residence time for entire ecoregion
